# Supplementary material for: A cross-sectional analysis of pharmaceutical industry-funded events for health professionals in Australia
Source: PubMed Central journal article supplement — BMJ Open. 2017 Jun 30;7(6):e016701. doi: 10.1136/bmjopen-2017-016701 (PMC5726125; doi:10.1136/bmjopen-2017-016701), 2017-06-30
Supplement: bmjopen-2017-016701.draft_revisions.pdf [file bmjopen-2017-016701.draft_revisions.pdf]

# BMJ Open

**Pharmaceutical industry-funded events for health  
professionals:  
A cross-sectional analysis of data released under Australian  
transparency rules**

|                                 |                                                                                                                                                                                                                                                                                                                                                                                                                                                                                                                                                                                                                                                                                                                                   |
|---------------------------------|-----------------------------------------------------------------------------------------------------------------------------------------------------------------------------------------------------------------------------------------------------------------------------------------------------------------------------------------------------------------------------------------------------------------------------------------------------------------------------------------------------------------------------------------------------------------------------------------------------------------------------------------------------------------------------------------------------------------------------------|
| Journal:                        | <i>BMJ Open</i>                                                                                                                                                                                                                                                                                                                                                                                                                                                                                                                                                                                                                                                                                                                   |
| Manuscript ID                   | bmjopen-2017-016701                                                                                                                                                                                                                                                                                                                                                                                                                                                                                                                                                                                                                                                                                                               |
| Article Type:                   | Research                                                                                                                                                                                                                                                                                                                                                                                                                                                                                                                                                                                                                                                                                                                          |
| Date Submitted by the Author:   | 03-Mar-2017                                                                                                                                                                                                                                                                                                                                                                                                                                                                                                                                                                                                                                                                                                                       |
| Complete List of Authors:       | Fabbri, Alice; Universita degli Studi dell'Insubria, Centre of Research in Medical Pharmacology; The University of Sydney, Charles Perkins Centre and Faculty of Pharmacy<br>Grundy, Quinn; The University of Sydney, Charles Perkins Centre and Faculty of Pharmacy<br>Mintzes, Barbara; The University of Sydney, Charles Perkins Centre and Faculty of Pharmacy<br>Swandari, Swestika; The University of Sydney, Charles Perkins Centre and Faculty of Pharmacy<br>Moynihan, Ray; Bond University, Faculty of Health Sciences and Medicine; The University of Sydney, Sydney Medical School<br>Walkom, Emily; University of Newcastle,<br>Bero, Lisa; The University of Sydney, Charles Perkins Centre and Faculty of Pharmacy |
| <b>Primary Subject Heading</b>: | Public health                                                                                                                                                                                                                                                                                                                                                                                                                                                                                                                                                                                                                                                                                                                     |
| Secondary Subject Heading:      | Health policy, Public health                                                                                                                                                                                                                                                                                                                                                                                                                                                                                                                                                                                                                                                                                                      |
| Keywords:                       | Health policy < HEALTH SERVICES ADMINISTRATION & MANAGEMENT, PUBLIC HEALTH, EDUCATION & TRAINING (see Medical Education & Training)                                                                                                                                                                                                                                                                                                                                                                                                                                                                                                                                                                                               |
|                                 |                                                                                                                                                                                                                                                                                                                                                                                                                                                                                                                                                                                                                                                                                                                                   |

SCHOLARONE™  
Manuscripts

1  
2  
3  
4 1 **Pharmaceutical industry-funded events for health professionals:**

5  
6 2 **A cross-sectional analysis of data released under Australian transparency rules**

7  
8  
9 3  
10 4  
11  
12  
13  
14 5 Alice Fabbri, Quinn Grundy, Barbara Mintzes, Swestika Swandari, Ray Moynihan, Emily  
15 6 Walkom, Lisa A Bero

16  
17 7  
18  
19  
20  
21 8 Alice Fabbri, PhD student, Centre of Research in Medical Pharmacology, University of Insubria,  
22 9 Varese, 21100, Italy

23  
24  
25 10 Quinn Grundy, Postdoctoral Research Fellow, Charles Perkins Centre and Faculty of Pharmacy,  
26 11 The University of Sydney, Camperdown NSW 2006, Australia

27  
28 12 Barbara Mintzes, Senior Lecturer, Charles Perkins Centre and Faculty of Pharmacy,  
29 13 The University of Sydney, Camperdown NSW 2006, Australia

30  
31  
32 14 Swestika Swandari, MPharm student, Charles Perkins Centre and Faculty of Pharmacy,  
33 15 The University of Sydney, Camperdown NSW 2006, Australia

34  
35 16 Ray Moynihan, Senior Research Fellow, Faculty of Health Sciences and Medicine,  
36 17 Bond University, QLD 4229, Australia

37  
38  
39 18 Emily Walkom, Research Academic, School of Medicine and Public Health, University of Newcastle,  
40 19 NSW 2308, Australia

41  
42  
43 20 Lisa A Bero, Professor, Charles Perkins Centre and Faculty of Pharmacy, The University of Sydney,  
44 21 Camperdown NSW 2006, Australia

45  
46 22  
47  
48  
49 23 **Corresponding author:**

50  
51  
52 24 Prof. Lisa A Bero, Email: [lisa.bero@sydney.edu.au](mailto:lisa.bero@sydney.edu.au)

53  
54 25 Telephone: +61 2 8627 1881

1  
2  
3 26 **Word count:** 2208  
4  
5  
6  
7 27  
8  
9  
10 28 **Abstract**  
11  
12 29 **Objectives** To analyse patterns and characteristics of pharmaceutical industry sponsorship of  
13 30 events for Australian health professionals and to understand the implications of changes in  
14 31 reporting standards for payments to health professionals.  
15  
16  
17  
18 32  
19 33 **Design** Cross-sectional analysis.  
20  
21 34  
22  
23 35 **Participants and Setting** 301 publicly available company transparency reports downloaded  
24 36 from the website of Medicines Australia, the pharmaceutical industry trade association, covering  
25 37 the period from October 2011 to September 2015.  
26  
27  
28 38  
29  
30 39 **Results** Forty-two companies sponsored 116,845 events for health professionals, on average 608  
31 40 per week with 30 attendees per event. Events typically included a broad range of health  
32 41 professionals: 82.0% included medical doctors and 38.3% trainees. Oncology, surgery and  
33 42 endocrinology were the most frequent clinical areas of focus. Most events (64.2%) were held in a  
34 43 clinical setting. The median cost per event was AU\$ 263 (Interquartile range \$153-\$1,195) and  
35 44 over 90% included food and beverages.  
36  
37  
38  
39 45  
40  
41  
42 46 **Conclusions** Over this four-year period, industry-sponsored events were widespread and  
43 47 pharmaceutical companies maintained a high frequency of contact with health professionals.  
44 48 Most events were held in clinical settings, suggesting a pervasive commercial presence in  
45 49 everyday clinical practice. Food and beverages, known to be associated with changes to  
46 50 prescribing practice, were almost always provided. New Australian transparency provisions  
47 51 explicitly exclude meals from the reporting requirements, thus a large proportion of potentially  
48 52 influential payments from pharmaceutical companies to health professionals will disappear from  
49 53 public view.  
50  
51  
52  
53  
54  
55  
56  
57  
58  
59  
60

1  
2  
3  
4  
5  
6  
7  
8  
9  
10  
11  
12  
13  
14  
15  
16  
17  
18  
19  
20  
21  
22  
23  
24  
25  
26  
27  
28  
29  
30  
31  
32  
33  
34  
35  
36  
37  
38  
39  
40  
41  
42  
43  
44  
45  
46  
47  
48  
49  
50  
51  
52  
53  
54  
55  
56  
57  
58  
59  
60  
61  
62  
63  
64  
65  
66  
67  
68  
69  
70

## STRENGTHS AND LIMITATIONS OF THIS STUDY

- Transparency reports exist in Australia where companies report every industry-sponsored event for health professionals.
- From these publicly available reports, we have created a searchable world-first database with details of more than 100,000 industry-sponsored events for health professionals, enabling researchers to analyse the intersection of pharmaceutical marketing and medical education.
- The submission of transparency reports by companies to Medicines Australia is voluntary and we could not verify the accuracy and completeness of data.
- Since the Code of Conduct's transparency reporting requirements applies only to members of Medicines Australia, the available reports likely underestimate the true extent of industry sponsorship of events for health professionals.

## 71 Introduction

72

73

74 Full disclosure of financial relationships between the pharmaceutical industry and health  
75 professionals is a key strategy adopted to make these interactions more transparent. Many  
76 jurisdictions have recently introduced transparency provisions, including the United States (US)  
77 and the European Union, but the extent of the disclosure obligation varies. For example, meals  
78 and drinks fall outside the scope of disclosure obligations under new voluntary transparency  
79 provisions introduced by the European Federation of Pharmaceutical Industry Associations.(1)  
80 At the same time, in the US, over 100 medical societies recently backed a bill that would exempt  
81 pharmaceutical and medical device companies from reporting an entire category of payments to  
82 doctors: those related to continuing medical education.(2)

83

84 Australia was one of the first countries to move towards public reporting of these payments.  
85 Since 2007, Medicines Australia, the trade association of the prescription medicines industry, has  
86 required member companies to provide detailed reports of sponsorship of events for health  
87 professionals, including hospitality and travel for attendees, room rentals, speaker honoraria, and  
88 food, with reports published on the Medicines Australia website.(3) These disclosure provisions  
89 were a condition for approval of Medicines Australia's Code of Conduct by the Australian  
90 Competition and Consumer Commission and were upheld following a legal appeal by  
91 industry.(4) Reports include events for all registered healthcare professionals, making Australia  
92 one of the few countries with transparency extending to non-physicians.(5,6) Changes to this  
93 policy were introduced in 2015, with the focus on events replaced by disclosure of payments to  
94 individuals.(3) Moreover, the new Code no longer requires reporting of payments for food and  
95 beverages.

96

97 At a time when disclosure policies are being debated and revised in several settings, Australian  
98 data can provide valuable insights into patterns of industry sponsorship and on characteristics of  
99 transparency provisions that are needed to capture expenditures of pharmaceutical companies on  
100 health professionals. Apart from two analyses of data from the first six months of the Australian

1  
2  
3 101 disclosure scheme,(5,7) and one brief report on events involving nurses,(6) no comprehensive  
4  
5 102 longer-term analyses have been conducted.  
6

7 103  
8  
9 104 The objectives of this study are: to describe the nature and frequency of industry-sponsored  
10 105 events for health professionals; to create an open-access searchable database of these events; and  
11 106 to estimate the information that will be lost under newly introduced reporting standards.  
12  
13  
14 107  
15 108

## 17 109 **Methods**

### 20 110 21 111 *Data Sources*

22 112  
23 113 We downloaded all the available reports from the Medicines Australia website  
24 114 ([www.medicinesaustralia.com.au](http://www.medicinesaustralia.com.au)) in PDF format. The 301 PDF reports of approximately 15,000  
25 115 pages covered the period October 2011 to September 2015. The PDFs had been originally  
26 116 created in Microsoft Excel. We requested the original Excel files from Medicines Australia but  
27 117 were refused on the basis that member companies had not given permission for their release. We  
28 118 converted the PDF files into Excel format using free, online converter programs, cleaned the data  
29 119 to address errors introduced during file conversion, and ensured consistency of reporting in each  
30 120 column.  
31  
32 121

### 33 122 *Coding*

34 123  
35 124 We designed a coding scheme based on the available data and variables of theoretical interest  
36 125 based on the literature on industry-professional interactions.(8,9) The research team iteratively  
37 126 developed a set of keywords to define each variable of interest (Supplementary File 1). Using  
38 127 Excel's filter function, we used the keywords to search the unstructured descriptive text and to  
39 128 dichotomously code event features as "present/absent", including:

- 40 129 • sponsoring companies, grouped based on mergers and acquisitions as of March 31<sup>st</sup> 2016;
- 41 130 • geographical location by Australian state or overseas location;

- 1  
2  
3  
4 131 • professional status of attendees (e.g. specialists, nurses, trainees);  
5 132 • clinical focus based on clinical specialty of attendees and event description (e.g.  
6 oncology, endocrinology, cardiology);  
7 133  
8  
9 134 • type of event (e.g. journal club, workshop, in-services);  
10 135 • type of hospitality provided (e.g. breakfast, lunch, dinner)  
11  
12  
13

14 137 *Statistical analysis*  
15  
16 138

17  
18 139 We present frequency tables for the characteristics of the events, and median spending levels per  
19 140 event and company. Cost variables are reported in AU\$. As the data were not normally  
20 141 distributed, we used Mann-Whitney U tests for the differences between medians. Analyses were  
21 142 performed using SPSS-Version 22.  
22  
23  
24  
25 143  
26  
27  
28  
29  
30  
31  
32  
33  
34  
35  
36  
37  
38  
39  
40  
41  
42  
43  
44  
45  
46  
47  
48  
49  
50  
51  
52  
53  
54  
55  
56  
57  
58  
59  
60

1  
2  
3 144 **Results**  
4

5 145  
6

7 146 *General Overview*  
8

9 147  
10

11 148 From October 2011 to September 2015, 42 pharmaceutical companies in Australia sponsored  
12 149 116,845 events involving health professionals. On average, there were 2,434 events per month  
13 150 and 608 events per week. Each year, the number of events sharply decreased in December  
14 151 through February, likely reflecting the holiday season.  
15  
16 152

17  
18  
19 153 Table 1 provides illustrative examples of sponsored events as presented verbatim in the company  
20 154 reports, chosen to reflect variations in reporting and event type. Events varied greatly in scope  
21 155 and intensity, ranging from a half hour journal club with sandwiches in a hospital meeting room,  
22 156 to a several day conference with overseas flight, accommodation and hospitality provided. The  
23 157 professional status was sometimes described generically as “healthcare professionals” or  
24 158 contained a list of the professions in attendees. The level of detail companies reported regarding  
25 159 the program’s content and the extent of explicit product promotion also varied; most of the event  
26 160 descriptions were disease-focused (e.g. “Journal Club on Chronic Obstructive Pulmonary  
27 161 Disease”) but in some cases the events mentioned specific drug names (e.g. “Introducing Zoely  
28 162 and other Emerging Trends in Contraception”).  
29  
30  
31  
32  
33  
34  
35  
36  
37 163  
38  
39  
40  
41  
42  
43  
44  
45  
46  
47  
48  
49  
50  
51  
52  
53  
54  
55  
56  
57  
58  
59  
60



1  
2  
3 164 *Attendees*  
4  
5 165

6 166 Over this four-year period, there were 3,481,750 individual attendances at industry-  
7  
8 167 sponsored events. On average there were 30 participants (SD=137.12) per event;  
9  
10 168 97.2% (n=113,595) of the events had fewer than 100 attendees and 0.2% (n=210) had  
11  
12 169 more than 1000 participants. Over 40% (n=47,084) of events included participants  
13  
14 170 from multiple professions. Table 2 lists the professional status of attendees and the  
15  
16 171 most frequent clinical areas of focus for the events. Events were most frequently  
17  
18 172 oncology-related, while otolaryngology and andrology were least represented.  
19

20 174 *Location and characteristics of sponsored events*  
21  
22 175

23 176 Three quarters of events were held in the three Australian states with the largest  
24  
25 177 populations: New South Wales (30.7%, n=35,888), Victoria (26.9%, n=31,448), and  
26  
27 178 Queensland (18.8%, n= 21,963), and few were held overseas (1.9%, n= 2,262).  
28  
29 179 Nearly two thirds of events (64.2%, n=74,998) were held in a clinical setting, such as  
30  
31 180 hospitals, clinics or doctors' offices. Non-clinical venues included restaurants, hotels  
32  
33 181 and convention centres. One third of the events were described as a generic "meeting"  
34  
35 182 (37.5%, n=43,810) while others were described as journal clubs (28.5%, n=33,281),  
36  
37 183 clinical meetings (3%, n=3,533), grand rounds (3.8%, n=4,472), in-services (2.6%,  
38  
39 184 n=3,038), or workshops (2.6%, n=3,029). Only 4.2% (n=4,290) were described as  
40  
41 185 scientific meetings (e.g. conferences or congresses).  
42

43 186  
44 187 *Costs and hospitality*  
45

46 188  
47 189 Reporting companies spent AU\$ 286,117,928 on events for health professionals. On  
48  
49 190 average, companies spent AU\$ 2,449 per event (SD \$15,020) while the median cost  
50  
51 191 was AU\$ 263 (Interquartile range (IQR)\$153-\$1,195). The median cost per person  
52  
53 192 was AU\$ 14 (IQR \$10- \$68). In 81.7% of the events (n=95,483) the costs were below  
54  
55 193 AU\$ 100 per attendee and in 2.1% (n=2,438) the costs were over AU\$ 1000 per  
56  
57 194 attendee.  
58  
59 195  
60

1  
2  
3 196 Table 3 shows the median cost per person by characteristics of events. The median  
4  
5 197 total cost per person was significantly higher when the event format was a scientific  
6  
7 198 meeting (AU\$ 93, IQR \$33-659) compared with other event types ( $p<0.001$ ), for  
8  
9 199 events held overseas (AU\$ 710, IQR \$91-7,300) compared with events held in  
10  
11 200 Australia ( $p<0.001$ ) or outside the clinical settings (AU\$ 91, IQR \$28-154) as  
12  
13 201 compared with events in the clinical setting ( $p<0.001$ ).  
14

15 202  
16 203 Reported “hospitality or financial support” provided to attendees included registration  
17  
18 204 fees, travel, accommodation, parking and food and beverage. Food was provided at  
19  
20 205 90.4% ( $n=105,667$ ) of events: 22.2% included lunches ( $n=25,935$ ), 17.0% dinners  
21  
22 206 ( $n=19,873$ ), 12.0% teas ( $n=14,067$ ), 11.0% breakfasts ( $n=12,806$ ), 2.7% were all-day  
23  
24 207 events with meals ( $n=3,113$ ), and for 25.6% ( $n=29,873$ ), type of food and beverage  
25  
26 208 was unspecified. Total cost of food was more than AU\$ 84 million (AU\$ 84,862,791),  
27  
28 209 accounting for 29.7% of the total cost of these functions. However, for 65%  
29  
30 210 ( $n=75,949$ ) of events, the total listed cost for food and beverage was equal to the listed  
31  
32 211 total cost of the event, indicating that the company’s sponsorship extended to food  
33  
34 212 and beverage only. The median cost of food per person was AU\$ 12 (IQR \$8-\$20).  
35

### 36 213 37 214 *The top companies*

38 215  
39 216 Of the 42 pharmaceutical companies that provided reports, the top five in terms of the  
40  
41 217 numbers of sponsored events were AstraZeneca, Novartis, Merck Sharp & Dohme,  
42  
43 218 Roche, and Pfizer (Table 4). Boehringer Ingelheim had the highest cost per event with  
44  
45 219 a median cost of AU\$ 2,007 (IQR \$1,308-\$2,654), while Eli Lilly spent the least with  
46  
47 220 a median cost per function of AU\$ 145 (IQR \$62-\$455). Table 4 provides an  
48  
49 221 overview of event sponsorship by the top 20 companies, representing 87.8% of  
50  
51 222 events.  
52

### 53 223 54 224 *Availability of database*

55 225 The analysable dataset in CSV file format we have created is available at: doi [to be  
56  
57 226 inserted prior to publication]  
58

59 227  
60

1  
2  
3 228 **Discussion**  
4  
5 229

6 230 Pharmaceutical industry-funded events for health professionals were frequent and  
7  
8 231 pervasive with almost three and a half million individual attendances at over 116,000  
9  
10 232 events in the four-year period between 2011 and 2015. As a frame of reference, in  
11 233 2014 there were 610,148 registered health professionals in Australia,(10) suggesting  
12  
13 234 that there was wide exposure to these events. Events typically included a broad range  
14  
15 235 of professionals and multidisciplinary teams, including most commonly: medical  
16 236 specialists, nurses, trainees and primary care doctors. Nearly two-thirds of events  
17  
18 237 were held in clinical settings. Average costs per person were modest and the vast  
19  
20 238 majority of events (90.4%) included the provision of food and beverages.  
21 239 Additionally, for most events (65%), the only funding provided was for food and  
22  
23 240 beverages. Thus, our analysis suggests that the new Australian and European  
24  
25 241 transparency rules will decrease transparency because hospitality in the form of food  
26  
27 242 and/or beverages will be exempt from reporting.(1,3)  
28

29  
30  
31 243

32 244 Although professional education is critical for improving patient care, previous  
33 245 studies of internal pharmaceutical industry documents have shown that sponsored  
34 246 events have been effectively used as a marketing tool.(11,12) A systematic review  
35 247 from 2010 found that with rare exceptions, exposure to pharmaceutical industry  
36 248 information is associated with either no effect on prescribing or with adverse effects  
37 249 such as lower prescribing quality, higher frequency or costs.(13) More recently,  
38  
39 250 analyses of the Open Payments database in the US, have shown that payments for  
40 251 educational training and even the provision of low cost free meals, commonly  
41 252 provided at sponsored events, are associated with increased prescribing of promoted,  
42  
43 253 costly, brand-name medications.(14,15)  
44  
45  
46  
47  
48

49

50 255 Finally, we also found a high prevalence of trainee attendance at these events.  
51 256 Targeting medical trainees can lead to a process of normalisation and enculturation  
52 257 while trainees develop their professional identity. (16) This has been described as an  
53  
54 258 effective strategy “to influence physicians from the bottom up.”(12) Medical school  
55  
56 259 policies limiting trainee-industry interaction have been associated with a shift in  
57  
58  
59  
60

10

1  
2  
3 260 attitude (17) and reduced prescribing of costly new medicines without therapeutic  
4 261 advantages.(18)  
5  
6  
7

8 262

9 263 Our study has a number of limitations. Firstly, we relied on reports submitted by  
10 264 companies to Medicines Australia and could not verify the accuracy and completeness  
11 265 of data. Secondly, since the Code of Conduct's transparency reporting requirements  
12 266 applies only to members of Medicines Australia, the available reports likely  
13 267 underestimate the true extent of industry sponsorship of events for health  
14 268 professionals. For example, non-member manufacturers of prescription medicines and  
15 269 manufacturers of generic medicines, over-the-counter medicines and medical devices  
16 270 are not covered by these rules. Thirdly, with regard to the coding scheme, the research  
17 271 team identified a set of keywords to define each variable of interest and it is possible  
18 272 that some synonyms were missed due to variability in the data provided. Fourthly, we  
19 273 did not assess the content of events due to the unstructured and variable nature of  
20 274 reporting. Fifthly, our analysis focuses on industry sponsorship of events and did not  
21 275 examine differences in how event organizers manage potential influences. And  
22 276 finally, costs were not adjusted for inflation as this would likely have a limited impact  
23 277 on the Australian dollar over such a short time period. Notwithstanding these  
24 278 limitations, we have conducted a cross-sectional analysis of the only publicly  
25 279 available data on industry-sponsored events for health professionals.  
26  
27

28 280

29 281 In conclusion, our findings have several international implications for future research  
30 282 and policy initiatives. While Australian transparency reports are difficult to analyse  
31 283 due to their format, we have created an open-access searchable world-first database  
32 284 with details of more than 100,000 industry-sponsored events, enabling researchers to  
33 285 analyse the intersection of pharmaceutical marketing and medical education.  
34 286 Similarly, individual institutions such as hospitals or universities may use the data to  
35 287 see what industry-sponsored activities are happening within their own backyards, and  
36 288 whether they meet contemporary expectations for transparency and independence.  
37

38 289

39 290 At the policy level, at a time when new rules are being debated and revised globally,  
40 291 our findings underscore the need for more disclosure, not less. Transparency rules  
41 292 should be as inclusive as possible with regard to the type of companies required to  
42  
43  
44  
45  
46  
47  
48  
49  
50  
51  
52  
53  
54  
55  
56  
57  
58  
59  
60

1  
2  
3 293 report and also in terms of the scope of payments and categories of health  
4 294 professionals covered. The onus of reporting should not be on the industry only; for  
5 295 example, public sector hospitals could be required to report meal subsidies from  
6 296 pharmaceutical and device manufacturers. A stronger policy option, already  
7 297 implemented at several academic medical centres in the US, would be to eliminate the  
8 298 provision of free food by manufacturers.<sup>(19)</sup> In the long term, ways of expanding  
9 299 funding for independent continuing professional education should be explored. In the  
10 300 short term, health professionals should be more aware of the independent sources of  
11 301 information on drugs that are already available (e.g. NPSMedicineWise, the  
12 302 Australian Medicines Handbook and the independent drug bulletins).

13  
14  
15  
16  
17  
18  
19  
20  
21 303

22 304 Finally, our findings show decision-makers the extent of industry-sponsored activity  
23 305 which will be hidden if “free food” fails to be included in future transparency  
24 306 regimes.

25  
26 307

27  
28 308

29  
30 309

31  
32 310  
33  
34  
35  
36  
37  
38  
39  
40  
41  
42  
43  
44  
45  
46  
47  
48  
49  
50  
51  
52  
53  
54  
55  
56  
57  
58  
59  
60

**References**

- 1  
2  
3 311  
4  
5  
6  
7 312  
8  
9 313 1. EFPIA Code on disclosure of transfers of value from pharmaceutical  
10 314 companies to healthcare professionals and healthcare organisations. 6 June  
11 315 2014.<http://transparency.efpia.eu/uploads/Modules/Documents/efpia->  
12 316 [disclosure-code-2014.pdf](http://transparency.efpia.eu/uploads/Modules/Documents/efpia-disclosure-code-2014.pdf) (accessed on 5 September 2016).  
13  
14  
15 317 2. Rubenfire A. Doctors back bill to exempt CME from Open Payments  
16 318 reporting. Modern Healthcare. 22 July 2016.  
17 319 <http://www.modernhealthcare.com/article/20160722/NEWS/160729951>  
18 320 (accessed on 5 September 2016)  
19  
20 321 3. Medicines Australia, Code of Conduct Edition 18, 2015.  
21 322 [https://medicinesaustralia.com.au/wp-](https://medicinesaustralia.com.au/wp-content/uploads/sites/52/2010/01/20150617-PUB-Code-Edition-18-FINAL.pdf)  
22 323 [content/uploads/sites/52/2010/01/20150617-PUB-Code-Edition-18-](https://medicinesaustralia.com.au/wp-content/uploads/sites/52/2010/01/20150617-PUB-Code-Edition-18-FINAL.pdf)  
23 324 [FINAL.pdf](https://medicinesaustralia.com.au/wp-content/uploads/sites/52/2010/01/20150617-PUB-Code-Edition-18-FINAL.pdf) (accessed on 20 September 2016).  
24  
25 325 4. Australian Competition and Consumer Commission. Australian competition  
26 326 tribunal affirms ACCC's decision on extra reporting for Medicines Australia  
27 327 Code. Press release, 27 June 2007.  
28 328 [http://www.accc.gov.au/content/index.phtml/itemId/790845/fromItemId/6215](http://www.accc.gov.au/content/index.phtml/itemId/790845/fromItemId/621589?pageDefinitionItemId=16940)  
29 329 [89?pageDefinitionItemId=16940](http://www.accc.gov.au/content/index.phtml/itemId/790845/fromItemId/621589?pageDefinitionItemId=16940) (accessed on 5 September 2016).  
30 330 5. Robertson J, Walkom E, Moynihan R, et al. Pharmaceutical industry funding  
31 331 of educational events for pharmacists in Australia: an analysis of data from the  
32 332 first 6 months of a mandatory disclosure programme. International Journal of  
33 333 Pharmacy Practice 2010;18(2):88-92.  
34 334 6. Grundy Q, Fabbri A, Swandari S, Mintzes B, Bero, L. Guess who is also  
35 335 coming to dinner? The inclusion of nurses in pharmaceutical industry-  
36 336 sponsored events. JAMA Internal Medicine. doi:  
37 337 10.1001/jamainternmed.2016.5276.  
38 338 7. Robertson J, Moynihan R, Walkom E, et al. Mandatory Disclosure of  
39 339 Pharmaceutical Industry-Funded Events for Health Professionals. PLoS Med  
40 340 2009; 6(11): e1000128.

- 1  
2  
3 341 8. Henry DA, Hill SR, Doran E, et al. Medical specialists and pharmaceutical  
4 342 industry-sponsored research: a survey of the Australian experience. *Med J*  
5 343 *Aust* 2005;182(11):557-60.
- 6  
7  
8 344 9. Wazana A. Physicians and the pharmaceutical industry: is a gift ever just a  
9 345 gift? *JAMA* 2000;283(3):373-80.
- 10  
11 346 10. Australian Institute of Health and Welfare.  
12 347 <http://www.aihw.gov.au/workforce/> (accessed on 16 November 2016).
- 13  
14 348 11. Moynihan R. Doctors' education: the invisible influence of drug company  
15 349 sponsorship. *BMJ* 2008;336:416-7.
- 16  
17  
18 350 12. Steinman MA, Bero LA, Chren MM, Landefeld CS. Narrative review: the  
19 351 promotion of gabapentin: an analysis of internal industry documents. *Ann*  
20 352 *Intern Med* 2006;145(4):284-93.
- 21  
22  
23 353 13. Spurling G, Mansfield P, Montgomery BD, et al. Information from  
24 354 pharmaceutical companies and the quality, quantity, and cost of physicians'  
25 355 prescribing: a systematic review. *PLoS Med* 2010;7(10):e1000352.
- 26  
27  
28 356 14. Yeh JS, Franklin JM, Avorn J, et al. Association of Industry Payments to  
29 357 Physicians With the Prescribing of Brand-name Statins in Massachusetts.  
30 358 *JAMA Intern Med* 2016;176(6):763-8.
- 31  
32  
33 359 15. DeJong C, Aguilar T, Tseng C, et al. Pharmaceutical Industry-Sponsored  
34 360 Meals and Physician Prescribing Patterns for Medicare Beneficiaries. *JAMA*  
35 361 *Intern Med* 2016;176(8):1114-10.
- 36  
37  
38 362 16. Austad KE, Avorn J, Kesselheim AS. Medical students' exposure to and  
39 363 attitudes about the pharmaceutical industry: a systematic review. *PLoS Med*  
40 364 2011;8(5):e1001037.
- 41  
42  
43 365 17. Kao AC, Braddock C, Clay M, et al. Effect of educational interventions and  
44 366 medical school policies on medical students' attitudes toward pharmaceutical  
45 367 marketing practices: a multi-institutional study. *Acad Med* 2011; 86(11):  
46 368 1454-62.
- 47  
48  
49 369 18. King M, Essick C, Bearman P, Ross JS. Medical school gift restriction  
50 370 policies and physician prescribing of newly marketed psychotropic  
51 371 medications: difference-in-differences analysis. *BMJ* 2013; 346: f264.

1  
2  
3 372 19. American Medical Student Association. Conflict of Interest Policies at  
4 373 Academic Medical Centers. Scorecard 2014. <http://amsascorecard.org/>  
5 374 (accessed on 4 November 2016).  
6  
7  
8 375  
9 376  
10 377

---

11 378  
12  
13  
14 379  
15  
16  
17  
18 380 **Contributors:** AF, QG, BM, RM, LB conceived of the study. AF, QG, BM, RM, EW  
19 381 designed the coding scheme. AF, QG and SS acquired and analysed all data. AF  
20 382 drafted the manuscript. All the authors contributed to the writing of the paper and  
21 383 approved the final version. AF is the guarantor.  
22  
23  
24

25  
26 384 **Funding:** The work was partially funded via a University of Sydney Faculty of  
27 385 Pharmacy summer scholarship.  
28  
29  
30 386

31 387 **Role of the Funder/Sponsor:** The funding source had no role in the design and  
32 388 conduct of the study; collection, management, analysis, and interpretation of the data;  
33 389 preparation, review, or approval of the manuscript; and decision to submit the  
34 390 manuscript for publication.  
35  
36  
37  
38 391

39  
40 392 **Competing interests:** All authors have completed the ICMJE uniform disclosure  
41 393 form at [www.icmje.org/coi\\_disclosure.pdf](http://www.icmje.org/coi_disclosure.pdf) (available on request from the  
42 394 corresponding author). Dr. Mintzes reports that she was an expert witness on behalf of  
43 395 plaintiffs in a Canadian class action suit concerning cardiovascular risks of a  
44 396 testosterone gel. This testimony included an analysis of promotion of testosterone to  
45 397 health professionals; there was no specific relationship to the current study. The  
46 398 authors declare no other relationships or activities that could appear to have  
47 399 influenced the submitted work.  
48  
49  
50  
51  
52  
53  
54

55 400  
56  
57  
58  
59  
60



401 **Ethical approval:** Not required.

402

403 **Data sharing:** Upon acceptance for publication, the full dataset will be made  
404 available as a CSV file with a link in the publication.

405

406 **Access to the data:** All authors had full access to all of the data (including statistical  
407 reports and tables) in the study and can take responsibility for the integrity of the data  
408 and the accuracy of the data analysis.

409

410

### Tables and Boxes

411

412 Table 1. Illustrative examples of industry sponsored events

413

| Company         | Date        | Event content                                                                                                                                                                                          | Venue                            | Profession<br>als Present                              | Hospitality                                                   | Total Costs<br>and Costs<br>of<br>hospitality<br>per head                                           |
|-----------------|-------------|--------------------------------------------------------------------------------------------------------------------------------------------------------------------------------------------------------|----------------------------------|--------------------------------------------------------|---------------------------------------------------------------|-----------------------------------------------------------------------------------------------------|
| Astrazene<br>ca | Sep.<br>-15 | Educational Event<br>- Dinner meeting<br>Going for Goal:<br>Optimising<br>Treatment in<br>Type 2 Diabetes<br>and Incretin<br>Based Therapies;<br>and On the Road<br>to Glycemic<br>Control.<br>2 hours | Hotel<br>Realm<br>Barton,<br>ACT | 32 General<br>Practice<br>Nursing<br>Endocrinol<br>ogy | Dinner with<br>Alcoholic<br>and Non<br>Alcoholic<br>Beverages | \$3,305.45<br>includes 1<br>speaker fee<br>for<br>\$1,218.18<br>Hospitality<br>per head:<br>\$65.23 |

|                                        |              |                                                                                                                     |                                                                          |                                                                                                                   |                                                                                                                                   |                                                                                                                      |
|----------------------------------------|--------------|---------------------------------------------------------------------------------------------------------------------|--------------------------------------------------------------------------|-------------------------------------------------------------------------------------------------------------------|-----------------------------------------------------------------------------------------------------------------------------------|----------------------------------------------------------------------------------------------------------------------|
|                                        |              | educational content                                                                                                 |                                                                          |                                                                                                                   |                                                                                                                                   |                                                                                                                      |
| Astrazene<br>ca                        | Mar.<br>-15  | Educational Event<br>- Lunch meeting<br>Restless Legs. 1<br>hour educational<br>content                             | The<br>Golden<br>Horse<br>Footscr<br>ay,<br>VIC                          | 10 General<br>Practice<br>Respiratory<br>Medicine                                                                 | Lunch                                                                                                                             | \$848.82<br>includes<br>speaker fee<br>\$600<br>Hospitality<br>per head:<br>\$24.88                                  |
| Novartis                               | Feb.<br>-15  | Sponsorship of<br>Journal Club on:<br>Chronic<br>Obstructive<br>Pulmonary<br>Disease 1 hr<br>educational<br>content | Gold<br>Coast<br>Univer<br>sity<br>Hospit<br>al<br>Southp<br>ort,<br>QLD | 20 Medical<br>Students,<br>Nurses,<br>Pharmacists                                                                 | Afternoon<br>Tea                                                                                                                  | \$184<br>Hospitality<br>per head:<br>\$9.20                                                                          |
| Novartis                               | Mar.<br>-14  | Sponsorship of<br>Day Seminar on:<br><br>Immunosuppressa<br>nt<br>8 hrs educational<br>content                      | Alfred<br>Health<br>Melbo<br>urne,<br>VIC                                | 120<br>Cardiologis<br>ts, Nurses,<br>Registrars,<br>Renal<br>Physicians,<br>Surgeons,<br>Transplant<br>Physicians | Breakfast,<br>Coffee,<br>Lunch,<br>Afternoon<br>Tea, Light<br>Refreshmen<br>ts,<br>Morning<br>Tea, Non-<br>Alcoholic<br>Beverages | \$2,665<br>Includes<br>Speaker<br>Meal Costs<br>(for 8<br>speakers):<br>\$167<br>Hospitality<br>per head:<br>\$20.82 |
| Merck<br>Sharp &<br>Dohme<br>Australia | Oct. -<br>11 | Oncology Journal<br>Club [hours of<br>education = 1]                                                                | Mercy<br>Wome<br>n's<br>Hospit                                           | 5<br>Oncologists<br>, Nurses                                                                                      | Food &<br>beverages                                                                                                               | \$19.64,<br>Hospitality<br>per head:<br>\$3.92                                                                       |

|                                        |              |                                                                                                                                               |                                                                                   |                                                                                        |                     |                                                                                                                                           |
|----------------------------------------|--------------|-----------------------------------------------------------------------------------------------------------------------------------------------|-----------------------------------------------------------------------------------|----------------------------------------------------------------------------------------|---------------------|-------------------------------------------------------------------------------------------------------------------------------------------|
|                                        |              |                                                                                                                                               | al,<br>Heidel<br>berg,<br>VIC                                                     |                                                                                        |                     |                                                                                                                                           |
| Merck<br>Sharp &<br>Dohme<br>Australia | Oct. -<br>11 | Evening<br>educational<br>meeting<br>"Introducing<br>Zoely and other<br>Emerging Trends<br>in Contraception"<br>[hours of<br>education = 2.5] | Boatho<br>use by<br>the<br>Lake,<br>Barton,<br>ACT                                | 25<br>Obstetricia<br>ns and<br>Gynaecolog<br>ist                                       | Food &<br>beverages | Total Cost<br>\$2180.15<br>Includes<br>speaker fee<br>688.36,<br>speaker food<br>& bev<br>\$59.07,<br>Hospitality<br>per head:<br>\$57.31 |
| Roche<br>Products                      | Apr.<br>-14  | Multi<br>Disciplinary<br>Breast Cancer<br>Clinical Review<br>Meeting<br>Educational<br>Content = 1hr                                          | Royal<br>Adelai<br>de<br>Hospit<br>al<br>North<br>Terrac<br>e<br>Adelai<br>de, SA | 13 Surgery<br>Doctor<br>Oncology<br>Doctor<br>Oncology<br>Nurse<br>Pathology<br>Doctor | Lunch               | \$247<br>Hospitality<br>per head:<br>\$19                                                                                                 |
| Roche<br>Products                      | Jan. -<br>13 | Grand Rounds<br>Educational<br>Content = 1 hr 15<br>mins                                                                                      | Bunbur<br>y<br>Region<br>al<br>Hospit<br>al<br>Bussell<br>Highw<br>ay<br>Bunbur   | 20 Hospital<br>Healthcare<br>Professiona<br>ls                                         | Lunch               | \$272<br>Hospitality<br>per head<br>\$13.60                                                                                               |

|                  |           |                                                                                                                                                                                                     |                                                    |                                                     |                                         |                                                                                                                                                       |
|------------------|-----------|-----------------------------------------------------------------------------------------------------------------------------------------------------------------------------------------------------|----------------------------------------------------|-----------------------------------------------------|-----------------------------------------|-------------------------------------------------------------------------------------------------------------------------------------------------------|
|                  |           |                                                                                                                                                                                                     | y,WA                                               |                                                     |                                         |                                                                                                                                                       |
| Pfizer Australia | Apr. -13  | Pfizer Australia provided Sponsorship for Healthcare Professional to attend The European Congress of Clinical Microbiology and Infectious Disease (ECCMID) 2013. Educational Content - 33.75 hr(s). | International Congresses Centre, Berlin, Germany   | 1 Infectious Disease Specialist                     | Registration Fee, Travel, Accommodation | Total cost \$10,855.00 Includes Registration Fee (1 attendee \$878), Travel (Flights \$8,196, Transfers \$219), Accommodation (6 Room Nights \$1,562) |
| Pfizer Australia | Jun. - 15 | Journal Club - Chronic Pain, Educational Content - 1 hr(s).                                                                                                                                         | Peter MacCallum Cancer Centre, East Melbourne, VIC | 15 Palliative Care Nurse; Palliative Care Physician | Meal / Drinks                           | \$156 Hospitality per head \$10.40                                                                                                                    |

414

415

416

417 Table 2. Professional status of attendees and clinical areas of focus for the events (n =  
418 116,845).

| Characteristic                           | Number of events | Percent |
|------------------------------------------|------------------|---------|
| <b>Professional status of attendees*</b> |                  |         |
| Medical specialist                       | 80,060           | 68.5%   |
| Nurses                                   | 46,214           | 39.6%   |
| Trainees                                 | 44,774           | 38.3%   |
| Primary care doctors                     | 24,662           | 21.1%   |
| Pharmacists                              | 9,781            | 8.4%    |
| <b>Clinical areas of focus**</b>         |                  |         |
| Oncology                                 | 22,987           | 19.7%   |
| Surgery                                  | 13,306           | 11.4%   |
| Endocrinology                            | 12,655           | 10.8%   |
| Cardiology                               | 9,033            | 7.7%    |
| Haematology                              | 8,200            | 7.0%    |

419 \*percentages do not add to 100 because multiple types of professionals could attend an event.

420 \*\*data are presented for the 5 most frequent areas of focus so percentages do not add to 100.

421

422

423 Table 3. Characteristics of events and median cost per person

|                                                 | <b>Number of events</b><br><b>n=116,845</b><br><b>(%)</b> | <b>n</b> | <b>Median total cost per</b><br><b>person*(Interquartile Range)</b><br><b>\$ AU</b> |
|-------------------------------------------------|-----------------------------------------------------------|----------|-------------------------------------------------------------------------------------|
| <b>Location</b>                                 |                                                           |          |                                                                                     |
| Overseas                                        | 2,262 (1.9%)                                              |          | \$ 710 (91-7,300)                                                                   |
| Within Australia                                | 114,583 (98.1%)                                           |          | \$ 14 (10-62)                                                                       |
| <b>Setting</b>                                  |                                                           |          |                                                                                     |
| Clinical setting                                | 74,998 (64.2%)                                            |          | \$ 12 (9-15)                                                                        |
| Non-clinical setting                            | 41,847 (35.8%)                                            |          | \$ 91 (28-154)                                                                      |
| <b>Event type</b>                               |                                                           |          |                                                                                     |
| Scientific meeting (e.g. congress, conferences) | 4,920 (4.2%)                                              |          | \$ 93 (33-659)                                                                      |
| Other types of events                           | 111,925 (95.8%)                                           |          | \$ 14 (10-60)                                                                       |

424 \*Includes hospitality as well as other costs (e.g. venue hire, speaker honoraria, audiovisual  
425 hire)

426

427

428 Table 4. The top twenty companies in terms of number of sponsored events.

| Company                        | Number of events | Number of attendees | Total cost of food and beverage (AUS) | Total cost of function* (AUS) | Median total cost per event (IQR) (AUS) |
|--------------------------------|------------------|---------------------|---------------------------------------|-------------------------------|-----------------------------------------|
| <b>AstraZeneca</b>             | 13,968           | 435,686             | 12,725,027                            | 31,766,776                    | 318 (165-2,261)                         |
| <b>Novartis</b>                | 10,120           | 244,069             | 6,600,503                             | 27,467,246                    | 270 (167-1,154)                         |
| <b>Merck Sharp &amp; Dohme</b> | 9,142            | 214,621             | 5,388,247                             | 18,352,116                    | 341 (180-1,182)                         |
| <b>Roche</b>                   | 7,383            | 174,878             | 2,891,426                             | 16,625,126                    | 186 (129-284)                           |
| <b>Pfizer</b>                  | 7,125            | 188,439             | 3,740,677                             | 18,464,785                    | 236 (141-573)                           |
| <b>Sanofi</b>                  | 6,764            | 261,089             | 3,243,420                             | 13,668,127                    | 240 (149-600)                           |
| <b>Amgen</b>                   | 5,562            | 117,767             | 4,545,874                             | 11,145,245                    | 192 (117-332)                           |
| <b>Eli Lilly</b>               | 5,419            | 138,765             | 2,270,896                             | 7,949,786                     | 145 (62-455)                            |
| <b>Servier Lab</b>             | 4,245            | 145,111             | 4,347,268                             | 14,002,283                    | 482 (196-2,252)                         |
| <b>Mundipharma</b>             | 4,168            | 135,517             | 2,956,613                             | 8,939,046                     | 342 (182-2,394)                         |
| <b>Janssen</b>                 | 3,901            | 140,549             | 3,168,024                             | 14,643,568                    | 320 (164-1,818)                         |
| <b>GlaxoSmithKline</b>         | 3,706            | 103,331             | 2,993,037                             | 6,292,242                     | 254 (161-1,645)                         |
| <b>CSL</b>                     | 3,285            | 138,170             | 1,337,909                             | 6,000,501                     | 288 (179-1,427)                         |
| <b>Bristol Myers Squibb</b>    | 3,151            | 138,446             | 2,492,290                             | 12,755,630                    | 245 (82-1,900)                          |
| <b>Bayer</b>                   | 2,964            | 151,084             | 1,417,055                             | 8,146,292                     | 396 (194-1,500)                         |
| <b>IPSEN</b>                   | 2,802            | 85,475              | 984,477                               | 5,163,600                     | 254 (169-454)                           |
| <b>Abbott/AbbVie</b>           | 2,774            | 59,793              | 3,291,305                             | 6,437,623                     | 255 (157-1,037)                         |
| <b>Boehringer Ingelheim</b>    | 2,223            | 56,204              | 6,050,143                             | 8,724,933                     | 2,007 (1,308-2,654)                     |
| <b>Gilead Sciences</b>         | 2,049            | 45,510              | 990,419                               | 7,061,338                     | 245 (160-540)                           |
| <b>Merk Serono</b>             | 1,841            | 41,809              | 1,376,023                             | 4,237,372                     | 229 (145-626)                           |

1  
2  
3  
4  
5  
6  
7  
8  
9  
10  
11  
12  
13  
14  
15  
16  
17  
18  
19  
20  
21  
22  
23  
24  
25  
26  
27  
28  
29  
30  
31  
32  
33  
34  
35  
36  
37  
38  
39  
40  
41  
42  
43  
44  
45  
46  
47  
48  
49  
50  
51  
52  
53  
54  
55  
56  
57  
58  
59  
60

|                       |         |           |            |             |                 |
|-----------------------|---------|-----------|------------|-------------|-----------------|
| <b>Total – Top 20</b> | 102,592 | 3,016,313 | 72,810,634 | 247,843,635 | 262 (152-1,199) |
| <b>All companies</b>  | 116,845 | 3,481,750 | 84,862,792 | 286,117,928 | 263 (153-1,195) |

429 Abbreviations: IQR, interquartile range  
 430 \* Includes food and drink as well as other costs (e.g. venue hire, speaker honoraria,  
 431 audiovisual hire)  
 432  
 433  
 434

For peer review only



## Supplementary File 1. Keywords for coding

| Variable name | Keyword search                                                                                                                                                                                                                                                                                                                                                                                                                                                                                                                                                                                                                                                                                                                                                                                                                                                                                                                                                                                                                  |
|---------------|---------------------------------------------------------------------------------------------------------------------------------------------------------------------------------------------------------------------------------------------------------------------------------------------------------------------------------------------------------------------------------------------------------------------------------------------------------------------------------------------------------------------------------------------------------------------------------------------------------------------------------------------------------------------------------------------------------------------------------------------------------------------------------------------------------------------------------------------------------------------------------------------------------------------------------------------------------------------------------------------------------------------------------|
| COMPANY       | A. Menarini Australia Pty Ltd; Abbott Australasia Pty Ltd OR AbbVie Pty Ltd; Actelion Pharmaceuticals Australia Pty Ltd; Alexion Pharmaceuticals Australasia PTY LTD; Allergan Australia Pty Ltd; Amgen Australia; Astellas Pharma Australia Pty Ltd; Astrazeneca Pty Ltd; Baxter Healthcare Pty Ltd; Bayer Australia Ltd; Besins Healthcare Australia; BioCeuticals; Biogen Idec Australia Pty Limited; Boehringer Ingelheim Pty Limited; Bristol-Myers Squibb Australia Pty Limited; Celgene Pty Ltd; CSL (includes also bioCSL Australia Pty Ltd and CSL Behring); Eisai Australia Pty Ltd; Eli Lilly Australia Pty Ltd; Fresenius Kabi Australia; Gilead Sciences Pty.; GlaxoSmithKline Australia Pty Ltd; iNova Pharmaceuticals (Aus) Pty Ltd; IPSEN Pty Ltd; Janssen; LEO Pharma Pty Ltd; Lundbeck Australia; Merck Serono Australia Pty Ltd; MSD Australia Pty Ltd; Mundipharma Pty Ltd; Mylan EPD; Norgine Pty Limited; Novartis Pharmaceuticals Australia Pty Limited (includes also Alcon Laboratories); Novo Nordisk |

|                                                                                                             |                                                                                                                                                                                                                                                                                      |
|-------------------------------------------------------------------------------------------------------------|--------------------------------------------------------------------------------------------------------------------------------------------------------------------------------------------------------------------------------------------------------------------------------------|
|                                                                                                             | Pharmaceuticals; Pfizer Australia; Roche Products Pty Limited; Sanofi/Sanofi Aventis Australia Pty Ltd; Servier Laboratories (Australia) Pty Ltd; Shire Australia; Takeda Pharmaceuticals Australia Pty Ltd (includes also Nycomed Pty Ltd Report); UCB Pharma; Vifor Pharma Pty Ltd |
|                                                                                                             |                                                                                                                                                                                                                                                                                      |
| LOCATION                                                                                                    |                                                                                                                                                                                                                                                                                      |
| New South Wales                                                                                             | NSW, New South Wales, Sydney, other cities or suburbs, and postal codes of NSW*                                                                                                                                                                                                      |
| Victoria                                                                                                    | VIC, Victoria, Melbourne, other cities or suburbs and postal codes of VIC*                                                                                                                                                                                                           |
| Australian Capital Territory                                                                                | ACT, Australian Capital Territory, Canberra, other cities or suburbs, and postal codes of ACT*                                                                                                                                                                                       |
| Western Australia                                                                                           | WA, Western Australia, Perth, other cities or suburbs, and postal codes of WA*                                                                                                                                                                                                       |
| South Australia                                                                                             | SA, South Australia, Adelaide, other cities or suburbs, and postal codes of SA*                                                                                                                                                                                                      |
| North Territory                                                                                             | NT, North Territory, other cities or suburbs, and postal codes of NT*                                                                                                                                                                                                                |
| Tasmania                                                                                                    | TAS, Tasmania, Hobart, other cities or suburbs, and postal codes of Tasmania*                                                                                                                                                                                                        |
| Overseas                                                                                                    | Overseas: outside of Australia**                                                                                                                                                                                                                                                     |
| *Where the state or capital was not listed, events were hand coded based on postal codes, cities or suburbs |                                                                                                                                                                                                                                                                                      |
| **Events not taking place in an Australian state were hand-coded                                            |                                                                                                                                                                                                                                                                                      |

|                                                                                                                                                                                                                                                                                                                                                                                                                                                                                                                                                 |                                                                                                                                                                                                                 |
|-------------------------------------------------------------------------------------------------------------------------------------------------------------------------------------------------------------------------------------------------------------------------------------------------------------------------------------------------------------------------------------------------------------------------------------------------------------------------------------------------------------------------------------------------|-----------------------------------------------------------------------------------------------------------------------------------------------------------------------------------------------------------------|
| MEALS                                                                                                                                                                                                                                                                                                                                                                                                                                                                                                                                           |                                                                                                                                                                                                                 |
| • Lunch                                                                                                                                                                                                                                                                                                                                                                                                                                                                                                                                         | Lunch                                                                                                                                                                                                           |
| • Dinner                                                                                                                                                                                                                                                                                                                                                                                                                                                                                                                                        | Dinner                                                                                                                                                                                                          |
| • Breakfast                                                                                                                                                                                                                                                                                                                                                                                                                                                                                                                                     | Breakfast                                                                                                                                                                                                       |
| • Tea                                                                                                                                                                                                                                                                                                                                                                                                                                                                                                                                           | Afternoon tea, morning tea, light refreshments, light meals, sandwiches & drinks, coffee cart, snack and beverage, sushi                                                                                        |
| • All day events with meals                                                                                                                                                                                                                                                                                                                                                                                                                                                                                                                     | Day delegate package*; conference package**                                                                                                                                                                     |
| • Food unspecified                                                                                                                                                                                                                                                                                                                                                                                                                                                                                                                              | food & beverages, meals, drinks, in hospital catering, beverages, wine                                                                                                                                          |
| • No meals provided                                                                                                                                                                                                                                                                                                                                                                                                                                                                                                                             | Sponsorship/accommodation only, no hospitality provided, travel/accommodation only (domestic events)                                                                                                            |
| <p>*Note: “day delegate package” consisted of entries where multiple meals were listed ((Lunch, tea), (Breakfast, tea), (Dinner, tea), (Breakfast, lunch, tea))</p> <p>**Note: “conference package” consisted of events lasting multiple days and typically included a day delegate package, often accommodation (food and beverage not reported separately), registration (food and beverage not reported separately), or travel (including flights, registration, airfares, accommodation and food and beverages not reported separately)</p> |                                                                                                                                                                                                                 |
| EVENTS HELD IN CLINICAL SETTING                                                                                                                                                                                                                                                                                                                                                                                                                                                                                                                 | Hospital; clinic; practice; medicare local; health centre; surgery; medical centre; medical; health care centre; specialist centre; cancer centre; cancer care centre; heart centre; medical and dental centre; |

|                                                                        |                                                                                                                                                                                                                                                                                                                                                                                                                                                                                                                                                                              |
|------------------------------------------------------------------------|------------------------------------------------------------------------------------------------------------------------------------------------------------------------------------------------------------------------------------------------------------------------------------------------------------------------------------------------------------------------------------------------------------------------------------------------------------------------------------------------------------------------------------------------------------------------------|
|                                                                        | endocrine centre; radiotherapy centre; radiation centre; optical centre; eye centre; renal unit; ward; department; dept; community health; family planning; education centre.                                                                                                                                                                                                                                                                                                                                                                                                |
|                                                                        |                                                                                                                                                                                                                                                                                                                                                                                                                                                                                                                                                                              |
| PROFESSIONAL STATUS                                                    |                                                                                                                                                                                                                                                                                                                                                                                                                                                                                                                                                                              |
| <ul style="list-style-type: none"> <li>Primary care doctors</li> </ul> | GP; general practitioner; family medicine.                                                                                                                                                                                                                                                                                                                                                                                                                                                                                                                                   |
| <ul style="list-style-type: none"> <li>Nurses</li> </ul>               | Nurse                                                                                                                                                                                                                                                                                                                                                                                                                                                                                                                                                                        |
| <ul style="list-style-type: none"> <li>Pharmacists</li> </ul>          | Pharmacist                                                                                                                                                                                                                                                                                                                                                                                                                                                                                                                                                                   |
| <ul style="list-style-type: none"> <li>Trainees</li> </ul>             | Registrar; resident; intern; student; advanced trainee; RMO; resident medical officer; JHO; SHO; senior house officer; PHO; principal house officer; fellow                                                                                                                                                                                                                                                                                                                                                                                                                  |
| <ul style="list-style-type: none"> <li>Specialty care</li> </ul>       | Specialist; consultant; senior medical officer; SMO; visiting medical officer; VMO; general medicine; general physician; *ology physician; *ology doctor;<br><br>allergist; allergy physician; anesthesiologist; anesthetist; anaesthesiologist; anaesthetist; andrologist; cardiologist; dermatologist, diabetologist; emergency physician; emergency medicine physician; endocrinologist; epileptologist; gastroenterologist; geriatrician; getriatric physician; gynaecologist; obstetrician; OB/GYN; haematologist; hematologist; hepatologist; immunologist; infectious |

|                       |                                                                                                                                                                                                                                                                                                                                                                                                                                                                                                                                                                                                                                                          |
|-----------------------|----------------------------------------------------------------------------------------------------------------------------------------------------------------------------------------------------------------------------------------------------------------------------------------------------------------------------------------------------------------------------------------------------------------------------------------------------------------------------------------------------------------------------------------------------------------------------------------------------------------------------------------------------------|
|                       | disease physician; infectious disease doctor; internal medicine physician; microbiologist; neonatologist; neurologist; nuclear medicine physician; nephrologist; renal physician; renal doctor; urologist; oncologist; pharmacologist; pulmonologist; psychogeriatrician; ophthalmologist; rheumatologist; radiologist; respiratory physician; respiratory medicine physician; respiratory medicine doctor; palliative care physician; pathologist; sexual health physician; sexual health doctor; psychiatrist; psychiatry doctor; paediatrician; surgeon; surgery doctor; intensive care doctor; intensivist; intensive care physician; cardiothoracic |
|                       |                                                                                                                                                                                                                                                                                                                                                                                                                                                                                                                                                                                                                                                          |
| <b>CLINICAL FOCUS</b> |                                                                                                                                                                                                                                                                                                                                                                                                                                                                                                                                                                                                                                                          |
| • Allergy/Immunology  | Allergist; allergy; immunologist; immunology                                                                                                                                                                                                                                                                                                                                                                                                                                                                                                                                                                                                             |
| • Anaesthesiology     | Anesthesiologist; anesthetist; anaesthesiologist; anaesthetist; anaesthesiology                                                                                                                                                                                                                                                                                                                                                                                                                                                                                                                                                                          |
| • Andrology           | Andrologist                                                                                                                                                                                                                                                                                                                                                                                                                                                                                                                                                                                                                                              |
| • Cardiology          | Cardiologist; cardiology                                                                                                                                                                                                                                                                                                                                                                                                                                                                                                                                                                                                                                 |
| • Dermatology         | Dermatologist; dermatology                                                                                                                                                                                                                                                                                                                                                                                                                                                                                                                                                                                                                               |
| • Emergency           | Emergency                                                                                                                                                                                                                                                                                                                                                                                                                                                                                                                                                                                                                                                |
| • Endocrinology       | endocrinologist; endocrinology; diabetologist; diabetology; diabetes                                                                                                                                                                                                                                                                                                                                                                                                                                                                                                                                                                                     |
| • Gastroenterology    | Gastroenterologist; gastroenterology; Hepatologist; hepatology                                                                                                                                                                                                                                                                                                                                                                                                                                                                                                                                                                                           |

|                                                                                        |                                                              |
|----------------------------------------------------------------------------------------|--------------------------------------------------------------|
| • Geriatrics                                                                           | Geriatrician; geriatric; psychogeriatrician; elderly         |
| • Haematology                                                                          | Haematologist; haematology; hematology; hematologist         |
| • Infectious Diseases                                                                  | Infectious disease; microbiologist; microbiology             |
| • Internal Medicine                                                                    | Internal medicine                                            |
| • Intensive care                                                                       | Intensive care; intensivist; critical care                   |
| • Neonatology                                                                          | Neonatologist; neonatology; NICU; neonatal                   |
| • Nuclear medicine                                                                     | Nuclear medicine                                             |
| • Nephrology                                                                           | Nephrologist, nephrology; renal; kidney                      |
| • Neurology                                                                            | Neurologist; neurology; epileptologist                       |
| • Obstetrics/Gynaecology                                                               | Gynaecologist; gynaecology; obstetrician; OB/GYN; obstetrics |
| • Oncology                                                                             | Oncologist; oncology; cancer                                 |
| • Ophthalmology                                                                        | Ophthalmologist; ophthalmology                               |
| • Otolaryngology                                                                       | Otolaryngology                                               |
| • Palliative care                                                                      | Palliative care                                              |
| • Pathology                                                                            | Pathologist; pathology                                       |
| • Pharmacology                                                                         | Pharmacologist; pharmacology                                 |
| • Paediatrics                                                                          | Paediatrician; paediatric*; pediatric*                       |
| • Psychiatry                                                                           | Psychiatrist; psychiatry; mental health                      |
| • Radiology                                                                            | Radiologist; radiology                                       |
| • Rheumatology                                                                         | Rheumatologist; rheumatology                                 |
| • Respiratory medicine                                                                 | Lung specialist; respiratory; pulmonologist                  |
| • Sexual health                                                                        | Sexual health                                                |
| • Surgery                                                                              | Surgeon; surgery; surgical; operating theatre                |
| • Urology                                                                              | Urologist; urology                                           |
| *Note: the clinical focus is a proxy variable based on clinical specialty of attendees |                                                              |

| and/or event description.     |                                                                                                                                            |
|-------------------------------|--------------------------------------------------------------------------------------------------------------------------------------------|
| EVENT TYPE                    |                                                                                                                                            |
| • Meeting (all inclusive/NOS) | Search for generic word “meeting”                                                                                                          |
| • Journal club                | Journal club; journalclub                                                                                                                  |
| • Inservice                   | Inservice                                                                                                                                  |
| • Workshop                    | Workshop                                                                                                                                   |
| • Grand rounds                | Grand round; grandround                                                                                                                    |
| • Scientific meeting          | scientific meeting; congress; conference<br>AND NOT<br>videoconference/teleconference                                                      |
| • Clinical meeting            | internal meeting; departmental meeting;<br>clinical meeting; case review, case<br>conference; case study meeting; case<br>study conference |
| • Multidisciplinary meeting   | Multidisciplinary meeting                                                                                                                  |

STROBE—Checklist of items that should be included in reports of *cross-sectional studies*

| Section/Topic                | Item # | Recommendation                                                                                                                                                                       | Reported on page #                        |
|------------------------------|--------|--------------------------------------------------------------------------------------------------------------------------------------------------------------------------------------|-------------------------------------------|
| Title and abstract           | 1      | (a) Indicate the study's design with a commonly used term in the title or the abstract                                                                                               | Page 1, 2                                 |
|                              |        | (b) Provide in the abstract an informative and balanced summary of what was done and what was found                                                                                  | Page 2                                    |
| <b>Introduction</b>          |        |                                                                                                                                                                                      |                                           |
| Background/rationale         | 2      | Explain the scientific background and rationale for the investigation being reported                                                                                                 | Page 4, 5                                 |
| Objectives                   | 3      | State specific objectives, including any prespecified hypotheses                                                                                                                     | Page 5                                    |
| <b>Methods</b>               |        |                                                                                                                                                                                      |                                           |
| Study design                 | 4      | Present key elements of study design early in the paper                                                                                                                              | Page 5                                    |
| Setting                      | 5      | Describe the setting, locations, and relevant dates, including periods of recruitment, exposure, follow-up, and data collection                                                      | Page 5                                    |
| Participants                 | 6      | (a) Give the eligibility criteria, and the sources and methods of selection of participants                                                                                          | Page 5                                    |
| Variables                    | 7      | Clearly define all outcomes, exposures, predictors, potential confounders, and effect modifiers. Give diagnostic criteria, if applicable                                             | Page 5,6                                  |
| Data sources/<br>measurement | 8*     | For each variable of interest, give sources of data and details of methods of assessment (measurement). Describe comparability of assessment methods if there is more than one group | Page 5,6                                  |
| Bias                         | 9      | Describe any efforts to address potential sources of bias                                                                                                                            | Methods: page 5, 6<br>Limitation: page 11 |
| Study size                   | 10     | Explain how the study size was arrived at                                                                                                                                            | Page 5,6                                  |
| Quantitative variables       | 11     | Explain how quantitative variables were handled in the analyses. If applicable, describe which groupings were chosen and why                                                         | Page 6                                    |
| Statistical methods          | 12     | (a) Describe all statistical methods, including those used to control for confounding                                                                                                | Page 6                                    |
|                              |        | (b) Describe any methods used to examine subgroups and interactions                                                                                                                  | N/A                                       |
|                              |        | (c) Explain how missing data were addressed                                                                                                                                          | N/A                                       |
|                              |        | (d) If applicable, describe analytical methods taking account of sampling strategy                                                                                                   | N/A                                       |
|                              |        | (e) Describe any sensitivity analyses                                                                                                                                                | N/A                                       |



|                          |     |                                                                                                                                                                                                              |            |
|--------------------------|-----|--------------------------------------------------------------------------------------------------------------------------------------------------------------------------------------------------------------|------------|
| <b>Results</b>           |     |                                                                                                                                                                                                              |            |
| Participants             | 13* | (a) Report numbers of individuals at each stage of study—eg numbers potentially eligible, examined for eligibility, confirmed eligible, included in the study, completing follow-up, and analysed            | Page 7     |
|                          |     | (b) Give reasons for non-participation at each stage                                                                                                                                                         | N/A        |
|                          |     | (c) Consider use of a flow diagram                                                                                                                                                                           | N/A        |
| Descriptive data         | 14* | (a) Give characteristics of study participants (eg demographic, clinical, social) and information on exposures and potential confounders                                                                     | Page 7     |
|                          |     | (b) Indicate number of participants with missing data for each variable of interest                                                                                                                          | N/A        |
| Outcome data             | 15* | Report numbers of outcome events or summary measures                                                                                                                                                         | 7-9        |
| Main results             | 16  | (a) Give unadjusted estimates and, if applicable, confounder-adjusted estimates and their precision (eg, 95% confidence interval). Make clear which confounders were adjusted for and why they were included | N/A        |
|                          |     | (b) Report category boundaries when continuous variables were categorized                                                                                                                                    | N/A        |
|                          |     | (c) If relevant, consider translating estimates of relative risk into absolute risk for a meaningful time period                                                                                             | N/A        |
| Other analyses           | 17  | Report other analyses done—eg analyses of subgroups and interactions, and sensitivity analyses                                                                                                               | N/A        |
| <b>Discussion</b>        |     |                                                                                                                                                                                                              |            |
| Key results              | 18  | Summarise key results with reference to study objectives                                                                                                                                                     | Page 10    |
| Limitations              | 19  | Discuss limitations of the study, taking into account sources of potential bias or imprecision. Discuss both direction and magnitude of any potential bias                                                   | Page 11    |
| Interpretation           | 20  | Give a cautious overall interpretation of results considering objectives, limitations, multiplicity of analyses, results from similar studies, and other relevant evidence                                   | Page 10,11 |
| Generalisability         | 21  | Discuss the generalisability (external validity) of the study results                                                                                                                                        | Page 10-12 |
| <b>Other information</b> |     |                                                                                                                                                                                                              |            |
| Funding                  | 22  | Give the source of funding and the role of the funders for the present study and, if applicable, for the original study on which the present article is based                                                | Page 15    |

\*Give information separately for cases and controls in case-control studies and, if applicable, for exposed and unexposed groups in cohort and cross-sectional studies.

**Note:** An Explanation and Elaboration article discusses each checklist item and gives methodological background and published examples of transparent reporting. The STROBE checklist is best used in conjunction with this article (freely available on the Web sites of PLoS Medicine at <http://www.plosmedicine.org/>, Annals of Internal Medicine at <http://www.annals.org/>, and Epidemiology at <http://www.epidem.com/>). Information on the STROBE Initiative is available at [www.strobe-statement.org](http://www.strobe-statement.org).

# BMJ Open

## A cross-sectional analysis of pharmaceutical industry-funded events for health professionals in Australia

|                                 |                                                                                                                                                                                                                                                                                                                                                                                                                                                                                                                                                                                                                                                                                                                                   |
|---------------------------------|-----------------------------------------------------------------------------------------------------------------------------------------------------------------------------------------------------------------------------------------------------------------------------------------------------------------------------------------------------------------------------------------------------------------------------------------------------------------------------------------------------------------------------------------------------------------------------------------------------------------------------------------------------------------------------------------------------------------------------------|
| Journal:                        | <i>BMJ Open</i>                                                                                                                                                                                                                                                                                                                                                                                                                                                                                                                                                                                                                                                                                                                   |
| Manuscript ID                   | bmjopen-2017-016701.R1                                                                                                                                                                                                                                                                                                                                                                                                                                                                                                                                                                                                                                                                                                            |
| Article Type:                   | Research                                                                                                                                                                                                                                                                                                                                                                                                                                                                                                                                                                                                                                                                                                                          |
| Date Submitted by the Author:   | 13-Apr-2017                                                                                                                                                                                                                                                                                                                                                                                                                                                                                                                                                                                                                                                                                                                       |
| Complete List of Authors:       | Fabbri, Alice; Universita degli Studi dell'Insubria, Centre of Research in Medical Pharmacology; The University of Sydney, Charles Perkins Centre and Faculty of Pharmacy<br>Grundy, Quinn; The University of Sydney, Charles Perkins Centre and Faculty of Pharmacy<br>Mintzes, Barbara; The University of Sydney, Charles Perkins Centre and Faculty of Pharmacy<br>Swandari, Swestika; The University of Sydney, Charles Perkins Centre and Faculty of Pharmacy<br>Moynihan, Ray; Bond University, Faculty of Health Sciences and Medicine; The University of Sydney, Sydney Medical School<br>Walkom, Emily; University of Newcastle,<br>Bero, Lisa; The University of Sydney, Charles Perkins Centre and Faculty of Pharmacy |
| <b>Primary Subject Heading</b>: | Public health                                                                                                                                                                                                                                                                                                                                                                                                                                                                                                                                                                                                                                                                                                                     |
| Secondary Subject Heading:      | Health policy, Public health                                                                                                                                                                                                                                                                                                                                                                                                                                                                                                                                                                                                                                                                                                      |
| Keywords:                       | Health policy < HEALTH SERVICES ADMINISTRATION & MANAGEMENT, PUBLIC HEALTH, EDUCATION & TRAINING (see Medical Education & Training)                                                                                                                                                                                                                                                                                                                                                                                                                                                                                                                                                                                               |
|                                 |                                                                                                                                                                                                                                                                                                                                                                                                                                                                                                                                                                                                                                                                                                                                   |

SCHOLARONE™  
Manuscripts

1  
2  
3  
4 1 **A cross-sectional analysis of pharmaceutical industry-funded events**  
5 2 **for health professionals in Australia**  
6  
7  
8 3  
9

10 4 Alice Fabbri, Quinn Grundy, Barbara Mintzes, Swestika Swandari, Ray Moynihan, Emily  
11 Walkom, Lisa A Bero  
12  
13  
14

15 6  
16  
17  
18 7 Alice Fabbri, PhD student, Centre of Research in Medical Pharmacology, University of Insubria,  
19 Varese, 21100, Italy  
20

21 9 Quinn Grundy, Postdoctoral Research Fellow, Charles Perkins Centre and Faculty of Pharmacy,  
22 The University of Sydney, Camperdown NSW 2006, Australia  
23

24 10  
25 11 Barbara Mintzes, Senior Lecturer, Charles Perkins Centre and Faculty of Pharmacy,  
26 The University of Sydney, Camperdown NSW 2006, Australia  
27

28 13 Swestika Swandari, MPharm student, Charles Perkins Centre and Faculty of Pharmacy,  
29 The University of Sydney, Camperdown NSW 2006, Australia  
30

31 14  
32 15 Ray Moynihan, Senior Research Fellow, Faculty of Health Sciences and Medicine,  
33 Bond University, QLD 4229, Australia  
34

35 17 Emily Walkom, Research Academic, School of Medicine and Public Health, University of Newcastle,  
36 NSW 2308, Australia  
37

38 18  
39 19 Lisa A Bero, Professor, Charles Perkins Centre and Faculty of Pharmacy, The University of Sydney,  
40 Camperdown NSW 2006, Australia  
41

42  
43 21  
44  
45  
46 22 **Corresponding author:**  
47

48  
49 23 Prof. Lisa A Bero, Email: [lisa.bero@sydney.edu.au](mailto:lisa.bero@sydney.edu.au)  
50

51 24 Telephone: +61 2 8627 1881  
52

53 25 **Word count:** 2446  
54  
55  
56  
57  
58  
59  
60

1  
2  
3 26  
4  
5  
67 **Abstract**

8  
9 **Objectives** To analyse patterns and characteristics of pharmaceutical industry sponsorship of  
10 events for Australian health professionals and to understand the implications of recent changes in  
11 transparency provisions that no longer require reporting of payments for food and beverages.  
12  
13

14  
15  
16 **Design** Cross-sectional analysis.  
17  
18

19  
20 **Participants and Setting** 301 publicly available company transparency reports downloaded  
21 from the website of Medicines Australia, the pharmaceutical industry trade association, covering  
22 the period from October 2011 to September 2015.  
23  
24

25  
26  
27 **Results** Forty-two companies sponsored 116,845 events for health professionals, on average 608  
28 per week with 30 attendees per event. Events typically included a broad range of health  
29 professionals: 82.0% included medical doctors, including specialists and primary care doctors,  
30 and 38.3% trainees. Oncology, surgery and endocrinology were the most frequent clinical areas  
31 of focus. Most events (64.2%) were held in a clinical setting. The median cost per event was  
32 AU\$ 263 (Interquartile range \$153-\$1,195) and over 90% included food and beverages.  
33  
34  
35  
36  
37  
38

39 **Conclusions** Over this four-year period, industry-sponsored events were widespread and  
40 pharmaceutical companies maintained a high frequency of contact with health professionals.  
41 Most events were held in clinical settings, suggesting a pervasive commercial presence in  
42 everyday clinical practice. Food and beverages, known to be associated with changes to  
43 prescribing practice, were almost always provided. New Australian transparency provisions  
44 explicitly exclude meals from the reporting requirements, thus a large proportion of potentially  
45 influential payments from pharmaceutical companies to health professionals will disappear from  
46 public view.  
47  
48  
49  
50  
51  
52

53  
54  
55  
56  
57  
58  
59  
60

1  
2  
3 554  
5 566  
7  
8 57 **STRENGTHS AND LIMITATIONS OF THIS STUDY**9  
10  
11 58  
12 59  
13 60  
14 61  
15 62  
16 63  
17 64  
18 65  
19 66  
20 67  
21 68  
22 69  
23 70  
24 71  
25  
26  
27  
28  
29  
30  
31  
32  
33  
34  
35  
36  
37  
38  
39  
40  
41  
42  
43  
44  
45  
46  
47  
48  
49  
50  
51  
52  
53  
54  
55  
56  
57  
58  
59  
60

- From publicly available reports released under Australian transparency rules, we have created a searchable world-first database with details of more than 100,000 industry-sponsored events for health professionals, enabling researchers to analyse the intersection of pharmaceutical marketing and medical education.
- In order to analyse the database, we iteratively identified a set of keywords for each variable of interest, however it is possible that some synonyms were missed.
- We relied upon data as presented in the Medicines Australia transparency reports and we did not verify the accuracy and completeness of data.
- Transparency requirements apply only to member companies, excluding manufacturers of generics, over-the-counter and non-member prescription medicine manufacturers, thus our analysis likely underestimates the true extent of industry sponsorship of events for health professionals.

## 72 Introduction

73

74

75 Full disclosure of financial relationships between the pharmaceutical industry and health  
76 professionals is a key strategy adopted to make these interactions more transparent. Many  
77 jurisdictions have recently introduced transparency provisions, including the United States (US)  
78 and the European Union, but the extent of the disclosure obligation varies. For example, meals  
79 and drinks fall outside the scope of disclosure obligations under new voluntary transparency  
80 provisions introduced by the European Federation of Pharmaceutical Industry Associations.(1)  
81 At the same time, in the US, over 100 medical societies recently backed a bill that would exempt  
82 pharmaceutical and medical device companies from reporting an entire category of payments to  
83 doctors: those related to continuing medical education.(2)

84

85 Australia was one of the first countries to move towards public reporting of these payments.  
86 Since 2007, Medicines Australia, the trade association of the prescription medicines industry, has  
87 required member companies to provide detailed reports of sponsorship of events for health  
88 professionals, which include company-initiated events, sponsored events organised by a third  
89 party, trade displays at educational events and sponsorship of healthcare professionals to attend  
90 events both in Australia and overseas.(3) The reports are published on the Medicines Australia  
91 website and include events for all registered healthcare professionals, making Australia one of  
92 the few countries with transparency extending to non-physicians.(4,5) These disclosure  
93 provisions were a condition for approval of Medicines Australia's Code of Conduct by the  
94 Australian Competition and Consumer Commission and were upheld following a legal appeal by  
95 industry.(6) Changes to this policy were introduced in 2015, with the focus on events replaced by  
96 disclosure of payments to individuals.(3) The reports detailing event sponsorship and aggregate  
97 payments to health professionals have been discontinued, and replaced with reports of payments  
98 to named individuals, similar to the Open Payments database in the US. Moreover, the new Code  
99 no longer requires reporting of payments for food and beverages.

100

1  
2  
3 101 At a time when disclosure policies are being debated and revised in several settings,(1,2,3)  
4  
5 102 Australian data can provide valuable insights into patterns of industry sponsorship and on  
6  
7 103 characteristics of transparency provisions that are needed to capture expenditures of  
8  
9 104 pharmaceutical companies on health professionals. Apart from two analyses of data from the first  
10  
11 105 six months of the Australian disclosure scheme,(4,7) and one brief report on events involving  
12  
13 106 nurses,(5) no comprehensive longer-term analyses have been conducted.  
14

15  
16 108 The objectives of this study are: to describe the nature and frequency of events for health  
17  
18 109 professionals sponsored by pharmaceutical companies that are members of Medicines Australia;  
19  
20 110 to create an open-access searchable database of these events; and to estimate the information that  
21  
22 111 will be lost under newly introduced reporting standards.  
23

24 112

25 113

## 26 114 **Methods**

27 115

### 28 116 ***Data Sources***

29 117

30 118 We downloaded all the available reports from the Medicines Australia website  
31  
32 119 ([www.medicinesaustralia.com.au](http://www.medicinesaustralia.com.au)) in PDF format. The 301 PDF reports of approximately 15,000  
33  
34 120 pages covered the period October 2011 to September 2015. The PDFs had been originally  
35  
36 121 created in Microsoft Excel. We requested the original Excel files from Medicines Australia but  
37  
38 122 were refused on the basis that member companies had not given permission for their release. We  
39  
40 123 converted the PDF files into Excel format using free, online converter programs, cleaned the data  
41  
42 124 to address errors introduced during file conversion, and ensured consistency of reporting in each  
43  
44 125 column.  
45

46 126 The reports cover information on the sponsoring company, timing, venue type, number and  
47  
48 127 profession of participants, hospitality and travel for attendees, room rentals and equipment, and  
49  
50 128 speaker honoraria.(3)  
51

52 129

### 53 130 ***Coding***

54

55

56

57

58

59

60

1  
2  
3  
4 131  
5 132 We designed a coding scheme based on the available data and variables of theoretical interest  
6  
7 133 based on the literature on industry-professional interactions(8,9) and on two previous analyses of  
8  
9 134 data from the first six months of the Australian disclosure scheme.(4,7) The research team  
10  
11 135 iteratively developed a set of keywords to define each variable of interest (Supplementary File  
12  
13 136 1). Using Excel's filter function, we used the keywords to search the unstructured descriptive  
14  
15 137 text and to dichotomously code event features as "present/absent", for the following variables:

- 16 138 • sponsoring companies, grouped based on mergers and acquisitions as of March 31<sup>st</sup> 2016;
- 17 139 • geographical location by Australian state or overseas location;
- 18 139 • professional status of attendees (e.g. specialists, nurses, trainees);
- 20 140 • clinical focus based on clinical specialty of attendees and event description (e.g.  
21 141 oncology, endocrinology, cardiology);
- 23 142 • type of event (e.g. journal club, workshop, in-services);
- 25 143 • type of hospitality provided (e.g. breakfast, lunch, dinner)

### 28 145 29 146 *Statistical analysis*

30 146  
31 147  
32 148 We present frequency tables for the characteristics of the events, and median spending levels per  
33  
34 149 event and company. Cost variables are reported in AU\$. As the data were not normally  
35  
36 150 distributed, we used Mann-Whitney U tests for the differences between medians. Analyses were  
37  
38 151 performed using SPSS-Version 22.  
39  
40  
41 152



1  
2  
3 153 **Results**  
4

5 154  
6

7 155 *General Overview*  
8

9 156  
10

11 157

12 158 From October 2011 to September 2015, 42 pharmaceutical companies in Australia sponsored  
13  
14 159 116,845 events involving health professionals. On average, there were 2,434 events per month  
15  
16 160 and 608 events per week. Each year, the number of events sharply decreased in December  
17  
18 161 through February, likely reflecting the holiday season.  
19

20 162

21 163 Table 1 provides illustrative examples of sponsored events as presented verbatim in the company  
22  
23 164 reports, chosen to reflect variations in reporting and event type. Events varied greatly in scope  
24  
25 165 and intensity, ranging from a half hour journal club with sandwiches in a hospital meeting room,  
26  
27 166 to a several day conference with overseas flight, accommodation and hospitality provided. The  
28  
29 167 professional status was sometimes described generically as “healthcare professionals” or  
30  
31 168 contained a list of the professions in attendees. The level of detail companies reported regarding  
32  
33 169 the program’s content and the extent of explicit product promotion also varied; most of the event  
34  
35 170 descriptions were disease-focused (e.g. “Journal Club on Chronic Obstructive Pulmonary  
36  
37 171 Disease”) but in some cases the events mentioned specific drug names (e.g. “Introducing Zoely  
38  
39 172 and other Emerging Trends in Contraception”).  
40

41  
42  
43  
44  
45  
46  
47  
48  
49  
50  
51  
52  
53  
54  
55  
56  
57  
58  
59  
60

1  
2  
3 174 *Attendees*  
4  
5

6  
7  
8  
9  
10  
11  
12  
13  
14  
15  
16  
17  
18  
19  
20  
21  
22  
23  
24  
25  
26  
27  
28  
29  
30  
31  
32  
33  
34  
35  
36  
37  
38  
39  
40  
41  
42  
43  
44  
45  
46  
47  
48  
49  
50  
51  
52  
53  
54  
55  
56  
57  
58  
59  
60

175

176 Over this four-year period, there were 3,481,750 individual attendances at industry-  
177 sponsored events. The median number of event attendees was 18 (interquartile range  
178 (IQR) 12-25); 97.2% (n=113,595) of the events had fewer than 100 attendees and  
179 0.2% (n=210) had more than 1000 participants. Over 40% (n=47,084) of events  
180 included participants from multiple professions. Table 2 lists the professional status of  
181 attendees and the most frequent clinical areas of focus for the events. Events were  
182 most frequently oncology-related, while otolaryngology and andrology were least  
183 represented.

184

185 *Location and characteristics of sponsored events*  
186

187 Three quarters of events were held in the three Australian states with the largest  
188 populations: New South Wales (30.7%, n=35,888), Victoria (26.9%, n=31,448), and  
189 Queensland (18.8%, n= 21,963), and few were held overseas (1.9%, n= 2,262).  
190 Nearly two thirds of events (64.2%, n=74,998) were held in a clinical setting, such as  
191 hospitals, clinics or doctors' offices. Non-clinical venues included restaurants, hotels  
192 and convention centres. One third of the events were described as a generic "meeting"  
193 (37.5%, n=43,810) while others were described as journal clubs (28.5%, n=33,281),  
194 clinical meetings (3%, n=3,533), grand rounds (3.8%, n=4,472), in-services (2.6%,  
195 n=3,038), or workshops (2.6%, n=3,029). Only 4.2% (n=4,290) were described as  
196 scientific meetings (e.g. conferences or congresses).

197

198 *Costs and hospitality*  
199

200 Reporting companies spent AU\$ 286,117,928 on events for health professionals. On  
201 average, companies spent AU\$ 2,449 per event (SD \$15,020) while the median cost  
202 was AU\$ 263 (IQR \$153-\$1,195). The median cost per person was AU\$ 14 (IQR  
203 \$10- \$68). In 81.7% of the events (n=95,483) the costs were below AU\$ 100 per  
204 attendee and in 2.1% (n=2,438) the costs were over AU\$ 1000 per attendee.

205

1  
2  
3 206 Table 3 shows the median cost per person by characteristics of events. The median  
4  
5 207 total cost per person was significantly higher when the event format was a scientific  
6  
7 208 meeting such as a congress or conference (AU\$ 93, IQR \$33-659) compared with  
8  
9 209 other event types ( $p<0.001$ ), for events held overseas (AU\$ 710, IQR \$91-7,300)  
10  
11 210 compared with events held in Australia ( $p<0.001$ ) or outside the clinical settings  
12  
13 211 (AU\$ 91, IQR \$28-154) as compared with events in the clinical setting ( $p<0.001$ ).  
14

15 213 Reported “hospitality or financial support” provided to attendees included registration  
16  
17 214 fees, travel, accommodation, parking and food and beverage. Food was provided at  
18  
19 215 90.4% ( $n=105,667$ ) of events: 22.2% included lunches ( $n=25,935$ ), 17.0% dinners  
20  
21 216 ( $n=19,873$ ), 12.0% teas ( $n=14,067$ ), 11.0% breakfasts ( $n=12,806$ ), 2.7% were all-day  
22  
23 217 events with meals ( $n=3,113$ ), and for 25.6% ( $n=29,873$ ), type of food and beverage  
24  
25 218 was unspecified. Total cost of food was more than AU\$ 84 million (AU\$ 84,862,791),  
26  
27 219 accounting for 29.7% of the total cost of these functions. However, for 65%  
28  
29 220 ( $n=75,949$ ) of events, the total listed cost for food and beverage was equal to the listed  
30  
31 221 total cost of the event, indicating that the company’s sponsorship extended to food  
32  
33 222 and beverage only. The median cost of food per person was AU\$ 12 (IQR \$8-\$20).  
34

### 35 223

### 36 224 *The top companies*

### 37 225

38 226 Of the 42 pharmaceutical companies that provided reports, the top five in terms of the  
39  
40 227 numbers of sponsored events were AstraZeneca, Novartis, Merck Sharp & Dohme,  
41  
42 228 Roche, and Pfizer (Table 4). Boehringer Ingelheim had the highest cost per event with  
43  
44 229 a median cost of AU\$ 2,007 (IQR \$1,308-\$2,654), while Eli Lilly spent the least with  
45  
46 230 a median cost per function of AU\$ 145 (IQR \$62-\$455). Table 4 provides an  
47  
48 231 overview of event sponsorship by the top 20 companies, representing 87.8% of  
49  
50 232 events.  
51

### 52 233

### 53 234 *Availability of database*

### 54 235

55 236 The analysable dataset in CSV file format we have created is available at: doi [to be  
56  
57 237 inserted prior to publication]  
58

1  
2  
3 238 **Discussion**  
4

5 239  
6 240 Pharmaceutical industry-funded events for health professionals were frequent and  
7  
8 241 pervasive with almost three and a half million individual attendances at over 116,000  
9  
10 242 events in the four-year period between 2011 and 2015. As a frame of reference, in  
11 243 2014 there were 610,148 registered health professionals in Australia,(10) suggesting  
12  
13 244 that there was wide exposure to these events. Events typically included a broad range  
14  
15 245 of professionals and multidisciplinary teams, including most commonly: medical  
16 246 specialists, nurses, trainees and primary care doctors. Nearly two-thirds of events  
17  
18 247 were held in clinical settings. Average costs per person were modest and the vast  
19  
20 248 majority of events (90.4%) included the provision of food and beverages.  
21 249 Additionally, for most events (65%), the only funding provided was for food and  
22  
23 250 beverages. Thus, our analysis suggests that the new Australian and European  
24  
25 251 transparency rules will decrease transparency because hospitality in the form of food  
26  
27 252 and/or beverages will be exempt from reporting.(1,3)  
28

29 253  
30  
31 254 Although professional education is critical for improving patient care, previous  
32 255 studies of internal pharmaceutical industry documents have shown that sponsored  
33 256 events have been effectively used as a marketing tool.(11,12) A systematic review  
34 257 from 2010 found that with rare exceptions, exposure to pharmaceutical industry  
35 258 information is associated with either no effect on prescribing or with adverse effects  
36 259 such as lower prescribing quality, higher frequency or costs.(13) More recently,  
37 260 analyses of the Open Payments database in the US, have shown that payments for  
38 261 educational training and even the provision of low cost free meals, commonly  
39 262 provided at sponsored events, are associated with increased prescribing of promoted,  
40 263 costly, brand-name medications.(14,15)  
41

42 264  
43  
44 265 Finally, we also found a high prevalence of trainee attendance at these events.  
45 266 Targeting medical trainees can lead to a process of normalisation and enculturation  
46 267 while trainees develop their professional identity. (16) This has been described as an  
47 268 effective strategy “to influence physicians from the bottom up.”(12) Medical school  
48 269 policies limiting trainee-industry interaction have been associated with a shift in

10

1  
2  
3 270 attitude (17) and reduced prescribing of costly new medicines without therapeutic  
4 271 advantages.(18)

5  
6 272

7  
8 273 Our study has a number of limitations. First, we relied on reports submitted by  
9 274 companies to Medicines Australia and could not verify the accuracy and completeness  
10 275 of data. Second, since the Code of Conduct's transparency reporting requirements  
11 276 applies only to members of Medicines Australia, the available reports likely  
12 277 underestimate the true extent of industry sponsorship of events for health  
13 278 professionals. Our analysis included only 42 Medicines Australia member companies;  
14 279 as a frame of reference there are approximately 140 separate firms listed as suppliers  
15 280 to the Australian Pharmaceutical Benefit Scheme.(19) Moreover, non-member  
16 281 manufacturers of branded prescription medicines, generic medicines, over-the-counter  
17 282 medicines and medical devices are not covered by the Medicines Australia Code.  
18 283 Third, with regard to the coding scheme, the research team identified a set of  
19 284 keywords to define each variable of interest and it is possible that some synonyms  
20 285 were missed due to variability in the data provided. Fourth, we did not assess the  
21 286 content of events due to the unstructured and variable nature of reporting. Fifth, our  
22 287 analysis focuses on industry sponsorship of events and did not examine differences in  
23 288 how event organizers manage potential influences. Finally, costs were not adjusted for  
24 289 inflation as this would likely have a limited impact on the Australian dollar over such  
25 290 a short time period. Notwithstanding these limitations, we have conducted a cross-  
26 291 sectional analysis of the only publicly available data on industry-sponsored events for  
27 292 health professionals.

28  
29  
30  
31  
32  
33  
34  
35  
36  
37  
38  
39  
40  
41 293

42  
43 294 In conclusion, our findings have several international implications for future research  
44 295 and policy initiatives. While Australian transparency reports are difficult to analyse  
45 296 due to their format, we have created an open-access searchable world-first database  
46 297 with details of more than 100,000 industry-sponsored events, enabling researchers to  
47 298 analyse the intersection of pharmaceutical marketing and medical education.  
48 299 Similarly, individual institutions such as hospitals or universities may use the data to  
49 300 see what industry-sponsored activities are happening within their own backyards, and  
50 301 whether they meet contemporary expectations for transparency and independence.

51  
52  
53  
54  
55  
56 302

1  
2  
3 303 At the policy level, at a time when new rules are being debated and revised globally,  
4 304 our findings underscore the need for more disclosure, not less. Transparency rules  
5 305 should be as inclusive as possible with regard to the type of companies required to  
6 306 report and also in terms of the scope of payments and categories of health  
7 307 professionals covered. The onus of reporting should not be on the industry only; for  
8 308 example, public sector hospitals as well as universities and professional associations  
9 309 could report meal subsidies from pharmaceutical and device manufacturers. A  
10 310 stronger policy option, already implemented at several academic medical centres in  
11 311 the US, would be to eliminate the provision of free food by manufacturers.(20) In the  
12 312 long term, ways of expanding funding for independent continuing professional  
13 313 education should be explored. There are already case studies showing that  
14 314 independence from industry sponsorship is achievable. For example the University of  
15 315 Michigan, as well as other major medical institutions in the US, no longer accept  
16 316 commercial support for continuing medical education.(21,22) This sets a valuable  
17 317 example that could become a model for other institutions. In the short term,  
18 318 universities and professional associations should make health professionals more  
19 319 aware of the independent sources of information on drugs that are already available  
20 320 (e.g. NPSMedicineWise, the Australian Medicines Handbook and the independent  
21 321 drug bulletins).

22  
23  
24  
25  
26  
27  
28  
29  
30  
31  
32  
33  
34  
35  
36 323 Finally, our findings highlight that transparency requirements likely capture only a  
37 324 portion of industry sponsorship of events for health professionals. Changes to the  
38 325 transparency requirements will likely exacerbate this issue by excluding common  
39 326 categories of payments. Thus, decision-makers should be aware of the extent of  
40 327 industry-sponsored activity which will be hidden if “free food” fails to be included in  
41 328 future transparency regimes.

42  
43  
44  
45  
46 329  
47  
48 330  
49  
50 331  
51 332  
52  
53  
54  
55  
56  
57  
58  
59  
60

## References

1. EFPIA Code on disclosure of transfers of value from pharmaceutical companies to healthcare professionals and healthcare organisations. 6 June 2014. <http://transparency.efpia.eu/uploads/Modules/Documents/efpia-disclosure-code-2014.pdf> (accessed on 5 September 2016).
2. Rubenfire A. Doctors back bill to exempt CME from Open Payments reporting. Modern Healthcare. 22 July 2016. <http://www.modernhealthcare.com/article/20160722/NEWS/160729951> (accessed on 5 September 2016)
3. Medicines Australia, Code of Conduct Edition 18, 2015. <https://medicinesaustralia.com.au/wp-content/uploads/sites/52/2010/01/20150617-PUB-Code-Edition-18-FINAL.pdf> (accessed on 20 September 2016).
4. Robertson J, Walkom E, Moynihan R, et al. Pharmaceutical industry funding of educational events for pharmacists in Australia: an analysis of data from the first 6 months of a mandatory disclosure programme. International Journal of Pharmacy Practice 2010;18(2):88-92.
5. Grundy Q, Fabbri A, Mintzes B, Swandari S, Bero L. The Inclusion of Nurses in Pharmaceutical Industry–Sponsored Events. Guess Who Is Also Coming to Dinner? JAMA Intern Med 2016;176(11):1718-1720. doi:10.1001/jamainternmed.2016.5276
6. Australian Competition and Consumer Commission. Australian competition tribunal affirms ACCC's decision on extra reporting for Medicines Australia Code. Press release, 27 June 2007. <http://www.accc.gov.au/content/index.phtml/itemId/790845/fromItemId/621589?pageDefinitionItemId=16940> (accessed on 5 September 2016).
7. Robertson J, Moynihan R, Walkom E, et al. Mandatory Disclosure of Pharmaceutical Industry-Funded Events for Health Professionals. PLoS Med 2009; 6(11): e1000128.

- 1  
2  
3 363 8. Henry DA, Hill SR, Doran E, et al. Medical specialists and pharmaceutical  
4 364 industry-sponsored research: a survey of the Australian experience. *Med J*  
5 365 *Aust* 2005;182(11):557-60.  
6  
7  
8 366 9. Wazana A. Physicians and the pharmaceutical industry: is a gift ever just a  
9 367 gift? *JAMA* 2000;283(3):373-80.  
10  
11 368 10. Australian Institute of Health and Welfare.  
12 369 <http://www.aihw.gov.au/workforce/> (accessed on 16 November 2016).  
13  
14 370 11. Moynihan R. Doctors' education: the invisible influence of drug company  
15 371 sponsorship. *BMJ* 2008;336:416-7.  
16  
17 372 12. Steinman MA, Bero LA, Chren MM, Landefeld CS. Narrative review: the  
18 373 promotion of gabapentin: an analysis of internal industry documents. *Ann*  
19 374 *Intern Med* 2006;145(4):284-93.  
20  
21 375 13. Spurling G, Mansfield P, Montgomery BD, et al. Information from  
22 376 pharmaceutical companies and the quality, quantity, and cost of physicians'  
23 377 prescribing: a systematic review. *PLoS Med* 2010;7(10):e1000352.  
24  
25 378 14. Yeh JS, Franklin JM, Avorn J, et al. Association of Industry Payments to  
26 379 Physicians With the Prescribing of Brand-name Statins in Massachusetts.  
27 380 *JAMA Intern Med* 2016;176(6):763-8.  
28  
29 381 15. DeJong C, Aguilar T, Tseng C, et al. Pharmaceutical Industry-Sponsored  
30 382 Meals and Physician Prescribing Patterns for Medicare Beneficiaries. *JAMA*  
31 383 *Intern Med* 2016;176(8):1114-10.  
32  
33 384 16. Austad KE, Avorn J, Kesselheim AS. Medical students' exposure to and  
34 385 attitudes about the pharmaceutical industry: a systematic review. *PLoS Med*  
35 386 2011;8(5):e1001037.  
36  
37 387 17. Kao AC, Braddock C, Clay M, et al. Effect of educational interventions and  
38 388 medical school policies on medical students' attitudes toward pharmaceutical  
39 389 marketing practices: a multi-institutional study. *Acad Med* 2011; 86(11):  
40 390 1454-62.  
41  
42 391 18. King M, Essick C, Bearman P, Ross JS. Medical school gift restriction  
43 392 policies and physician prescribing of newly marketed psychotropic  
44 393 medications: difference-in-differences analysis. *BMJ* 2013; 346: f264.  
45  
46 394 19. Department of industry, Innovation and Science of the Australian  
47 395 Government. Pharmaceuticals Industry Profile.



- 1  
2  
3 396 [https://industry.gov.au/industry/IndustrySectors/PharmaceuticalsandHealthTec](https://industry.gov.au/industry/IndustrySectors/PharmaceuticalsandHealthTechnologies/Pharmaceuticals/Pages/PharmaceuticalsIndustryProfile.aspx)  
4 397 [hnologies/Pharmaceuticals/Pages/PharmaceuticalsIndustryProfile.aspx](https://industry.gov.au/industry/IndustrySectors/PharmaceuticalsandHealthTechnologies/Pharmaceuticals/Pages/PharmaceuticalsIndustryProfile.aspx)  
5  
6 398 (accessed on 3 April 2017).  
7  
8 399 20. American Medical Student Association. Conflict of Interest Policies at  
9 Academic Medical Centers. Scorecard 2014. <http://amsascorecard.org/>  
10 400 (accessed on 4 November 2016).  
11 401  
12 402 21. Hutchinson RJ, Woolliscroft JO, Roll LC. U-M Medical School plans changes  
13 to Continuing Medical Education funding. Available at:  
14 [http://www.uofmhealth.org/u-m-medical-school-plans-changes-continuing-](http://www.uofmhealth.org/u-m-medical-school-plans-changes-continuing-medical-education-funding)  
15 [medical-education-funding](http://www.uofmhealth.org/u-m-medical-school-plans-changes-continuing-medical-education-funding) (accessed on 6 April 2017).  
16 404  
17 405  
18 406 22. Smith SR, Hams M, Wilkinson W. Policy Guide for Academic Medical  
19 Centers and Medical Schools. Toolkit on Continuing Medical Education.  
20 Available at: [http://www.communitycatalyst.org/doc-](http://www.communitycatalyst.org/doc-store/publications/CME_toolkit.pdf)  
21 [store/publications/CME\\_toolkit.pdf](http://www.communitycatalyst.org/doc-store/publications/CME_toolkit.pdf) (accessed on 6 April 2017).  
22 407  
23 408  
24 409  
25 410  
26 411  
27 412  
28 413  
29 414  
30 415  
31 416  
32 417  
33 418  
34 419  
35 420  
36 421  
37 422  
38 423  
39 424  
40 425  
41 426
- 

415 **Contributors:** AF, QG, BM, RM, LB conceived of the study. AF, QG, BM, RM, EW  
416 designed the coding scheme. AF, QG and SS acquired and analysed all data. AF  
417 drafted the manuscript. All the authors contributed to the writing of the paper and  
418 approved the final version. AF is the guarantor.

419 **Funding:** The work was partially funded via a University of Sydney Faculty of  
420 Pharmacy summer scholarship.

421  
422 **Role of the Funder/Sponsor:** The funding source had no role in the design and  
423 conduct of the study; collection, management, analysis, and interpretation of the data;  
424 preparation, review, or approval of the manuscript; and decision to submit the  
425 manuscript for publication.  
426

1  
2  
3 427 **Competing interests:** All authors have completed the ICMJE uniform disclosure  
4 428 form at [www.icmje.org/coi\\_disclosure.pdf](http://www.icmje.org/coi_disclosure.pdf) (available on request from the  
5 429 corresponding author). Dr. Mintzes reports that she was an expert witness on behalf of  
6 430 plaintiffs in a Canadian class action suit concerning cardiovascular risks of a  
7 431 testosterone gel. None of the authors received any payments, funding, or other  
8 432 financial support from pharmaceutical manufacturers. The authors declare no other  
9 433 relationships or activities that could appear to have influenced the submitted work.

10  
11  
12  
13  
14  
15  
16 434

17  
18 435 **Ethical approval:** Not required.

19  
20  
21 436

22  
23 437 **Data sharing:** Upon acceptance for publication, the full dataset will be made  
24 438 available as a CSV file with a link in the publication.

25  
26  
27  
28 439

29 440 **Access to the data:** All authors had full access to all of the data (including statistical  
30 441 reports and tables) in the study and can take responsibility for the integrity of the data  
31 442 and the accuracy of the data analysis.

32  
33 443

34  
35 444

36  
37 445

38  
39 446

40  
41 447

42  
43 448

44  
45 449

46  
47 450

48  
49 451

50  
51 452

52  
53 453

1  
2  
3  
4  
5  
6  
7  
8  
9  
10  
11  
12  
13  
14  
15  
16  
17  
18  
19  
20  
21  
22  
23  
24  
25  
26  
27  
28  
29  
30  
31  
32  
33  
34  
35  
36  
37  
38  
39  
40  
41  
42  
43  
44  
45  
46  
47  
48  
49  
50  
51  
52  
53  
54  
55  
56  
57  
58  
59  
60

454

For peer review only

1  
2  
3  
4  
5  
6  
7 455  
8  
9 **Tables and Boxes**  
10  
11 456  
12  
13 457  
14  
15 458

16  
17  
18  
19  
20  
21  
22  
23  
24  
25  
26  
27  
28  
29  
30  
31  
32  
33  
34  
35  
36  
37  
38  
39  
40  
41  
42  
43  
44  
45  
46  
47  
48  
49

Table 1. Illustrative examples of industry sponsored events\*

| Company     | Date      | Event content                                                                                                                                                                                   | Venue                           | Professional status of attendees       | Hospitality provided                              | Total Cost of Hospitality | Number of attendees | Total costs of function                          |
|-------------|-----------|-------------------------------------------------------------------------------------------------------------------------------------------------------------------------------------------------|---------------------------------|----------------------------------------|---------------------------------------------------|---------------------------|---------------------|--------------------------------------------------|
| Astrazeneca | Sep. - 15 | Educational Event - Dinner meeting<br>Going for Goal: Optimising Treatment in Type 2 Diabetes and Incretin Based Therapies; and On the Road to Glycemic Control.<br>2 hours educational content | Hotel Realm Barton, ACT         | General Practice Nursing Endocrinology | Dinner with Alcoholic and Non Alcoholic Beverages | \$2,087.27                | 32                  | \$3,305.45 includes 1 speaker fee for \$1,218.18 |
| Astrazeneca | Mar. - 15 | Educational Event - Lunch meeting Restless Legs. 1 hour educational content                                                                                                                     | The Golden Horse Footscray, VIC | General Practice Respiratory Medicine  | Lunch                                             | \$248.82                  | 10                  | \$848.82 includes speaker fee for \$600          |

1  
2  
3  
4  
5  
6  
7  
8  
9  
10  
11  
12  
13  
14  
15  
16  
17  
18  
19  
20  
21  
22  
23  
24  
25  
26  
27  
28  
29  
30  
31  
32  
33  
34  
35  
36  
37  
38  
39  
40  
41  
42  
43  
44  
45  
46  
47  
48  
49

|                           |              |                                                                                                      |                                                                   |                                                                                                            |                                                                                                                                   |                                                                                 |     |                                                                                                      |
|---------------------------|--------------|------------------------------------------------------------------------------------------------------|-------------------------------------------------------------------|------------------------------------------------------------------------------------------------------------|-----------------------------------------------------------------------------------------------------------------------------------|---------------------------------------------------------------------------------|-----|------------------------------------------------------------------------------------------------------|
| Novartis                  | Feb. -<br>15 | Sponsorship of Journal Club on:<br>Chronic Obstructive Pulmonary<br>Disease 1 hr educational content | Gold<br>Coast<br>Universit<br>y Hospital<br>Southport<br>,<br>QLD | Medical<br>Students,<br>Nurses,<br>Pharmacists                                                             | Afternoon<br>Tea                                                                                                                  | \$184<br>includes<br>Food &<br>Beverages<br>for 20<br>delegates<br>\$184        | 20  | \$184 includes Total<br>Hospitality : \$184                                                          |
| Novartis                  | Mar. -<br>14 | Sponsorship of Day Seminar on:<br>Immunosuppressant<br>8 hrs educational content                     | Alfred<br>Health<br>Melbourn<br>e, VIC                            | Cardiologists<br>, Nurses,<br>Registrars,<br>Renal<br>Physicians,<br>Surgeons,<br>Transplant<br>Physicians | Breakfast,<br>Coffee,<br>Lunch,<br>Afternoon<br>Tea, Light<br>Refreshme<br>nts,<br>Morning<br>Tea, Non-<br>Alcoholic<br>Beverages | \$2,498<br>includes<br>Food &<br>Beverages<br>for 120<br>delegates :<br>\$2,498 | 120 | \$2,665 Includes<br>Total Hospitality :<br>\$2,498 Speaker Costs:<br>Meal (for 8 speakers):<br>\$167 |
| Merck<br>Sharp &<br>Dohme | Oct. -<br>11 | Oncology Journal Club [hours of<br>education = 1]                                                    | Mercy<br>Women's<br>Hospital,                                     | Oncologists,<br>Nurses                                                                                     | Food &<br>beverages                                                                                                               | food & bev<br>19.64,<br>Total                                                   | 5   | Total Costs \$19.64                                                                                  |

|                               |           |                                                                                                                       |                                                    |                                                                         |                  |                                                  |    |                                                                         |
|-------------------------------|-----------|-----------------------------------------------------------------------------------------------------------------------|----------------------------------------------------|-------------------------------------------------------------------------|------------------|--------------------------------------------------|----|-------------------------------------------------------------------------|
| Australia                     |           |                                                                                                                       | Heidelberg, VIC                                    |                                                                         |                  | Hospitality<br>19.64                             |    |                                                                         |
| Merck Sharp & Dohme Australia | Oct. - 11 | Evening educational meeting "Introducing Zoely and other Emerging Trends in Contraception" [hours of education = 2.5] | Boathouse by the Lake, Barton, ACT                 | Obstetricians and Gynaecologist                                         | Food & beverages | food & bev 1432.72,<br>Total Hospitality 1432.72 | 25 | speaker fee 688.36,<br>speaker food & bev \$59.07, Total Cost \$2180.15 |
| Roche Products                | Apr. - 14 | Multi Disciplinary Breast Cancer Clinical Review Meeting<br>Educational Content = 1hr                                 | Royal Adelaide Hospital North Terrace Adelaide, SA | Surgery Doctor<br>Oncology Doctor<br>Oncology Nurse<br>Pathology Doctor | Lunch            | 247                                              | 13 | 247                                                                     |
| Roche Products                | Jan. - 13 | Grand Rounds<br>Educational Content = 1 hr 15 mins                                                                    | Bunbury Regional Hospital Bussell Highway          | Hospital Healthcare Professionals                                       | Lunch            | \$272                                            | 20 | \$272                                                                   |

1  
2  
3  
4  
5  
6  
7  
8  
9  
10  
11  
12  
13  
14  
15  
16  
17  
18  
19  
20  
21  
22  
23  
24  
25  
26  
27  
28  
29  
30  
31  
32  
33  
34  
35  
36  
37  
38  
39  
40  
41  
42  
43  
44  
45  
46  
47  
48  
49

|                     |              |                                                                                                                                                                                                                       |                                                                 |                                                              |                                                                                                                                                                    |         |    |             |
|---------------------|--------------|-----------------------------------------------------------------------------------------------------------------------------------------------------------------------------------------------------------------------|-----------------------------------------------------------------|--------------------------------------------------------------|--------------------------------------------------------------------------------------------------------------------------------------------------------------------|---------|----|-------------|
|                     |              |                                                                                                                                                                                                                       | Bunbury,<br>WA                                                  |                                                              |                                                                                                                                                                    |         |    |             |
| Pfizer<br>Australia | Apr. -<br>13 | Pfizer Australia provided<br>Sponsorship for Healthcare<br>Professional to attend The<br>European Congress of Clinical<br>Microbiology and Infectious<br>Disease (ECCMID) 2013.<br>Educational Content - 33.75 hr(s). | Internatio<br>nal<br>Congress<br>Centrum,<br>Berlin,<br>Germany | Infectious<br>Disease<br>Specialist                          | Registratio<br>n Fee (1<br>attende<br>e<br>\$878),<br>Travel<br>(Flights<br>\$8,196,<br>Transfers<br>\$219),<br>Accommod<br>ation (6<br>Room<br>Nights<br>\$1,562) | \$10855 | 1  | \$10,855.00 |
| Pfizer<br>Australia | Jun. -<br>15 | Journal Club - Chronic Pain,<br>Educational Content - 1 hr(s).                                                                                                                                                        | Peter<br>MacCallu<br>m Cancer<br>Centre,<br>East                | Palliative<br>Care Nurse;<br>Palliative<br>Care<br>Physician | Meal /<br>Drinks                                                                                                                                                   | \$156   | 15 | \$156       |

1  
2  
3  
4  
5  
6  
7  
8  
9  
10  
11  
12  
13  
14  
15  
16  
17  
18  
19  
20  
21  
22  
23  
24  
25  
26  
27  
28  
29  
30  
31  
32  
33  
34  
35  
36  
37  
38  
39  
40  
41  
42  
43  
44  
45  
46  
47  
48  
49

|  |  |  |                    |  |  |  |  |
|--|--|--|--------------------|--|--|--|--|
|  |  |  | Melbourn<br>e, VIC |  |  |  |  |
|--|--|--|--------------------|--|--|--|--|

459 \*Illustrative examples extracted verbatim from Medicines Australia transparency reports

460

461

For peer review only



462 Table 2. Professional status of attendees and clinical areas of focus for the events (n =  
463 116,845).

| Characteristic                           | Number of events | Percent |
|------------------------------------------|------------------|---------|
| <b>Professional status of attendees*</b> |                  |         |
| Medical specialists                      | 80,060           | 68.5    |
| Nurses                                   | 46,214           | 39.6    |
| Trainees                                 | 44,774           | 38.3    |
| Primary care doctors                     | 24,662           | 21.1    |
| Pharmacists                              | 9,781            | 8.4     |
| <b>Clinical areas of focus</b>           |                  |         |
| Oncology                                 | 22,987           | 19.7    |
| Surgery                                  | 13,306           | 11.4    |
| Endocrinology                            | 12,655           | 10.8    |
| Cardiology                               | 9,033            | 7.7     |
| Haematology                              | 8,200            | 7.0     |
| Respiratory Medicine                     | 7,659            | 6.6     |
| Psychiatry                               | 6,252            | 5.4     |
| Nephrology                               | 6,199            | 5.3     |
| Gastroenterology                         | 5,643            | 4.8     |
| Pathology                                | 5,361            | 4.6     |
| Neurology                                | 4,259            | 3.6     |
| Urology                                  | 4,259            | 3.6     |

|                        |       |      |
|------------------------|-------|------|
| Radiology              | 3,667 | 3.1  |
| Infectious Diseases    | 3,348 | 2.9  |
| Geriatrics             | 3,134 | 2.7  |
| Anaesthesiology        | 2,746 | 2.4  |
| Rheumatology           | 2,671 | 2.3  |
| Paediatrics            | 1,994 | 1.7  |
| Allergy/Immunology     | 1,398 | 1.2  |
| Ophthalmology          | 1,365 | 1.2  |
| Palliative Care        | 1,319 | 1.1  |
| Intensive Care         | 1,147 | 1.0  |
| Sexual Health          | 955   | 0.8  |
| Dermatology            | 913   | 0.8  |
| Obstetrics/Gynaecology | 878   | 0.8  |
| Emergency              | 875   | 0.7  |
| Internal Medicine      | 418   | 0.4  |
| Neonatology            | 363   | 0.3  |
| Nuclear Medicine       | 357   | 0.3  |
| Pharmacology           | 219   | 0.2  |
| Otolaryngology         | 31    | 0.03 |
| Andrology              | 18    | 0.02 |

464 \*percentages do not add to 100 because multiple types of professionals could attend an event.

465

466

467 Table 3. Characteristics of events and median cost per person

|                                                 | <b>Number of events<br/>n=116,845<br/>n (%)</b> | <b>Median total cost per<br/>person*(Interquartile Range)<br/>\$ AU</b> |
|-------------------------------------------------|-------------------------------------------------|-------------------------------------------------------------------------|
| <b>Location</b>                                 |                                                 |                                                                         |
| Overseas                                        | 2,262 (1.9%)                                    | \$ 710 (91-7,300)                                                       |
| Within Australia                                | 114,583 (98.1%)                                 | \$ 14 (10-62)                                                           |
| <b>Setting</b>                                  |                                                 |                                                                         |
| Clinical setting                                | 74,998 (64.2%)                                  | \$ 12 (9-15)                                                            |
| Non-clinical setting                            | 41,847 (35.8%)                                  | \$ 91 (28-154)                                                          |
| <b>Event type</b>                               |                                                 |                                                                         |
| Scientific meeting (e.g. congress, conferences) | 4,920 (4.2%)                                    | \$ 93 (33-659)                                                          |
| Other types of events                           | 111,925 (95.8%)                                 | \$ 14 (10-60)                                                           |

468 \*Includes hospitality as well as other costs (e.g. venue hire, speaker honoraria, audiovisual  
469 hire)

470

471

472 Table 4. The top twenty companies in terms of number of sponsored events.

| Company                        | Number of events | Number of attendees | Total cost of food and beverage (AU\$) | Total cost of function* (AU\$) | Median total cost per event (IQR) (AU\$) |
|--------------------------------|------------------|---------------------|----------------------------------------|--------------------------------|------------------------------------------|
| <b>AstraZeneca</b>             | 13,968           | 435,686             | 12,725,027                             | 31,766,776                     | 318 (165-2,261)                          |
| <b>Novartis</b>                | 10,120           | 244,069             | 6,600,503                              | 27,467,246                     | 270 (167-1,154)                          |
| <b>Merck Sharp &amp; Dohme</b> | 9,142            | 214,621             | 5,388,247                              | 18,352,116                     | 341 (180-1,182)                          |
| <b>Roche</b>                   | 7,383            | 174,878             | 2,891,426                              | 16,625,126                     | 186 (129-284)                            |
| <b>Pfizer</b>                  | 7,125            | 188,439             | 3,740,677                              | 18,464,785                     | 236 (141-573)                            |
| <b>Sanofi</b>                  | 6,764            | 261,089             | 3,243,420                              | 13,668,127                     | 240 (149-600)                            |
| <b>Amgen</b>                   | 5,562            | 117,767             | 4,545,874                              | 11,145,245                     | 192 (117-332)                            |
| <b>Eli Lilly</b>               | 5,419            | 138,765             | 2,270,896                              | 7,949,786                      | 145 (62-455)                             |
| <b>Servier Lab</b>             | 4,245            | 145,111             | 4,347,268                              | 14,002,283                     | 482 (196-2,252)                          |
| <b>Mundipharma</b>             | 4,168            | 135,517             | 2,956,613                              | 8,939,046                      | 342 (182-2,394)                          |
| <b>Janssen</b>                 | 3,901            | 140,549             | 3,168,024                              | 14,643,568                     | 320 (164-1,818)                          |
| <b>GlaxoSmithKline</b>         | 3,706            | 103,331             | 2,993,037                              | 6,292,242                      | 254 (161-1,645)                          |
| <b>CSL</b>                     | 3,285            | 138,170             | 1,337,909                              | 6,000,501                      | 288 (179-1,427)                          |
| <b>Bristol Myers Squibb</b>    | 3,151            | 138,446             | 2,492,290                              | 12,755,630                     | 245 (82-1,900)                           |
| <b>Bayer</b>                   | 2,964            | 151,084             | 1,417,055                              | 8,146,292                      | 396 (194-1,500)                          |
| <b>IPSEN</b>                   | 2,802            | 85,475              | 984,477                                | 5,163,600                      | 254 (169-454)                            |
| <b>Abbott/AbbVie</b>           | 2,774            | 59,793              | 3,291,305                              | 6,437,623                      | 255 (157-1,037)                          |
| <b>Boehringer Ingelheim</b>    | 2,223            | 56,204              | 6,050,143                              | 8,724,933                      | 2,007 (1,308-2,654)                      |
| <b>Gilead Sciences</b>         | 2,049            | 45,510              | 990,419                                | 7,061,338                      | 245 (160-540)                            |
| <b>Merk Serono</b>             | 1,841            | 41,809              | 1,376,023                              | 4,237,372                      | 229 (145-626)                            |

1  
2  
3  
4  
5  
6  
7  
8  
9  
10  
11  
12  
13  
14  
15  
16  
17  
18  
19  
20  
21  
22  
23  
24  
25  
26  
27  
28  
29  
30  
31  
32  
33  
34  
35  
36  
37  
38  
39  
40  
41  
42  
43  
44  
45  
46  
47  
48  
49  
50  
51  
52  
53  
54  
55  
56  
57  
58  
59  
60

|                       |         |           |            |             |                 |
|-----------------------|---------|-----------|------------|-------------|-----------------|
| <b>Total – Top 20</b> | 102,592 | 3,016,313 | 72,810,634 | 247,843,635 | 262 (152-1,199) |
| <b>All companies</b>  | 116,845 | 3,481,750 | 84,862,792 | 286,117,928 | 263 (153-1,195) |

473 Abbreviations: IQR, interquartile range  
474 \* Includes food and drink as well as other costs (e.g. venue hire, speaker honoraria,  
475 audiovisual hire)  
476  
477  
478

For peer review only

## Supplementary File 1. Keywords for coding

| Variable name | Keyword search                                                                                                                                                                                                                                                                                                                                                                                                                                                                                                                                                                                                                                                                                                                                                                                                                                                                                                                                                                                                                         |
|---------------|----------------------------------------------------------------------------------------------------------------------------------------------------------------------------------------------------------------------------------------------------------------------------------------------------------------------------------------------------------------------------------------------------------------------------------------------------------------------------------------------------------------------------------------------------------------------------------------------------------------------------------------------------------------------------------------------------------------------------------------------------------------------------------------------------------------------------------------------------------------------------------------------------------------------------------------------------------------------------------------------------------------------------------------|
| COMPANY       | <p>A. Menarini Australia Pty Ltd; Abbott Australasia Pty Ltd OR AbbVie Pty Ltd; Actelion Pharmaceuticals Australia Pty Ltd; Alexion Pharmaceuticals Australasia PTY LTD; Allergan Australia Pty Ltd; Amgen Australia; Astellas Pharma Australia Pty Ltd; Astrazeneca Pty Ltd; Baxter Healthcare Pty Ltd; Bayer Australia Ltd; Besins Healthcare Australia; BioCeuticals; Biogen Idec Australia Pty Limited; Boehringer Ingelheim Pty Limited; Bristol-Myers Squibb Australia Pty Limited; Celgene Pty Ltd; CSL (includes also bioCSL Australia Pty Ltd and CSL Behring); Eisai Australia Pty Ltd; Eli Lilly Australia Pty Ltd; Fresenius Kabi Australia; Gilead Sciences Pty.; GlaxoSmithKline Australia Pty Ltd; iNova Pharmaceuticals (Aus) Pty Ltd; IPSEN Pty Ltd; Janssen; LEO Pharma Pty Ltd; Lundbeck Australia; Merck Serono Australia Pty Ltd; MSD Australia Pty Ltd; Mundipharma Pty Ltd; Mylan EPD; Norgine Pty Limited; Novartis Pharmaceuticals Australia Pty Limited (includes also Alcon Laboratories); Novo Nordisk</p> |

|                                                                                                             |                                                                                                                                                                                                                                                                                      |
|-------------------------------------------------------------------------------------------------------------|--------------------------------------------------------------------------------------------------------------------------------------------------------------------------------------------------------------------------------------------------------------------------------------|
|                                                                                                             | Pharmaceuticals; Pfizer Australia; Roche Products Pty Limited; Sanofi/Sanofi Aventis Australia Pty Ltd; Servier Laboratories (Australia) Pty Ltd; Shire Australia; Takeda Pharmaceuticals Australia Pty Ltd (includes also Nycomed Pty Ltd Report); UCB Pharma; Vifor Pharma Pty Ltd |
|                                                                                                             |                                                                                                                                                                                                                                                                                      |
| LOCATION                                                                                                    |                                                                                                                                                                                                                                                                                      |
| New South Wales                                                                                             | NSW, New South Wales, Sydney, other cities or suburbs, and postal codes of NSW*                                                                                                                                                                                                      |
| Victoria                                                                                                    | VIC, Victoria, Melbourne, other cities or suburbs and postal codes of VIC*                                                                                                                                                                                                           |
| Australian Capital Territory                                                                                | ACT, Australian Capital Territory, Canberra, other cities or suburbs, and postal codes of ACT*                                                                                                                                                                                       |
| Western Australia                                                                                           | WA, Western Australia, Perth, other cities or suburbs, and postal codes of WA*                                                                                                                                                                                                       |
| South Australia                                                                                             | SA, South Australia, Adelaide, other cities or suburbs, and postal codes of SA*                                                                                                                                                                                                      |
| North Territory                                                                                             | NT, North Territory, other cities or suburbs, and postal codes of NT*                                                                                                                                                                                                                |
| Tasmania                                                                                                    | TAS, Tasmania, Hobart, other cities or suburbs, and postal codes of Tasmania*                                                                                                                                                                                                        |
| Overseas                                                                                                    | Overseas: outside of Australia**                                                                                                                                                                                                                                                     |
| *Where the state or capital was not listed, events were hand coded based on postal codes, cities or suburbs |                                                                                                                                                                                                                                                                                      |
| **Events not taking place in an Australian state were hand-coded                                            |                                                                                                                                                                                                                                                                                      |

|                                                                                                                                                                                                                                                                                                                                                                                                                                                                                                                                                 |                                                                                                                                                                                                                 |
|-------------------------------------------------------------------------------------------------------------------------------------------------------------------------------------------------------------------------------------------------------------------------------------------------------------------------------------------------------------------------------------------------------------------------------------------------------------------------------------------------------------------------------------------------|-----------------------------------------------------------------------------------------------------------------------------------------------------------------------------------------------------------------|
| MEALS                                                                                                                                                                                                                                                                                                                                                                                                                                                                                                                                           |                                                                                                                                                                                                                 |
| <ul style="list-style-type: none"> <li>Lunch</li> </ul>                                                                                                                                                                                                                                                                                                                                                                                                                                                                                         | Lunch                                                                                                                                                                                                           |
| <ul style="list-style-type: none"> <li>Dinner</li> </ul>                                                                                                                                                                                                                                                                                                                                                                                                                                                                                        | Dinner                                                                                                                                                                                                          |
| <ul style="list-style-type: none"> <li>Breakfast</li> </ul>                                                                                                                                                                                                                                                                                                                                                                                                                                                                                     | Breakfast                                                                                                                                                                                                       |
| <ul style="list-style-type: none"> <li>Tea</li> </ul>                                                                                                                                                                                                                                                                                                                                                                                                                                                                                           | Afternoon tea, morning tea, light refreshments, light meals, sandwiches & drinks, coffee cart, snack and beverage, sushi                                                                                        |
| <ul style="list-style-type: none"> <li>All day events with meals</li> </ul>                                                                                                                                                                                                                                                                                                                                                                                                                                                                     | Day delegate package*; conference package**                                                                                                                                                                     |
| <ul style="list-style-type: none"> <li>Food unspecified</li> </ul>                                                                                                                                                                                                                                                                                                                                                                                                                                                                              | food & beverages, meals, drinks, in hospital catering, beverages, wine                                                                                                                                          |
| <ul style="list-style-type: none"> <li>No meals provided</li> </ul>                                                                                                                                                                                                                                                                                                                                                                                                                                                                             | Sponsorship/accommodation only, no hospitality provided, travel/accommodation only (domestic events)                                                                                                            |
| <p>*Note: “day delegate package” consisted of entries where multiple meals were listed ((Lunch, tea), (Breakfast, tea), (Dinner, tea), (Breakfast, lunch, tea))</p> <p>**Note: “conference package” consisted of events lasting multiple days and typically included a day delegate package, often accommodation (food and beverage not reported separately), registration (food and beverage not reported separately), or travel (including flights, registration, airfares, accommodation and food and beverages not reported separately)</p> |                                                                                                                                                                                                                 |
| EVENTS HELD IN CLINICAL SETTING                                                                                                                                                                                                                                                                                                                                                                                                                                                                                                                 | Hospital; clinic; practice; medicare local; health centre; surgery; medical centre; medical; health care centre; specialist centre; cancer centre; cancer care centre; heart centre; medical and dental centre; |



|                                                                          |                                                                                                                                                                                                                                                                                                                                                                                                                                                                                                                                                                              |
|--------------------------------------------------------------------------|------------------------------------------------------------------------------------------------------------------------------------------------------------------------------------------------------------------------------------------------------------------------------------------------------------------------------------------------------------------------------------------------------------------------------------------------------------------------------------------------------------------------------------------------------------------------------|
|                                                                          | endocrine centre; radiotherapy centre; radiation centre; optical centre; eye centre; renal unit; ward; department; dept; community health; family planning; education centre.                                                                                                                                                                                                                                                                                                                                                                                                |
|                                                                          |                                                                                                                                                                                                                                                                                                                                                                                                                                                                                                                                                                              |
| <b>PROFESSIONAL STATUS</b>                                               |                                                                                                                                                                                                                                                                                                                                                                                                                                                                                                                                                                              |
| <ul style="list-style-type: none"> <li>• Primary care doctors</li> </ul> | GP; general practitioner; family medicine.                                                                                                                                                                                                                                                                                                                                                                                                                                                                                                                                   |
| <ul style="list-style-type: none"> <li>• Nurses</li> </ul>               | Nurse                                                                                                                                                                                                                                                                                                                                                                                                                                                                                                                                                                        |
| <ul style="list-style-type: none"> <li>• Pharmacists</li> </ul>          | Pharmacist                                                                                                                                                                                                                                                                                                                                                                                                                                                                                                                                                                   |
| <ul style="list-style-type: none"> <li>• Trainees</li> </ul>             | Registrar; resident; intern; student; advanced trainee; RMO; resident medical officer; JHO; SHO; senior house officer; PHO; principal house officer; fellow                                                                                                                                                                                                                                                                                                                                                                                                                  |
| <ul style="list-style-type: none"> <li>• Specialty care</li> </ul>       | Specialist; consultant; senior medical officer; SMO; visiting medical officer; VMO; general medicine; general physician; *ology physician; *ology doctor;<br><br>allergist; allergy physician; anesthesiologist; anesthetist; anaesthesiologist; anaesthetist; andrologist; cardiologist; dermatologist, diabetologist; emergency physician; emergency medicine physician; endocrinologist; epileptologist; gastroenterologist; geriatrician; getriatric physician; gynaecologist; obstetrician; OB/GYN; haematologist; hematologist; hepatologist; immunologist; infectious |

|                       |                                                                                                                                                                                                                                                                                                                                                                                                                                                                                                                                                                                                                                                          |
|-----------------------|----------------------------------------------------------------------------------------------------------------------------------------------------------------------------------------------------------------------------------------------------------------------------------------------------------------------------------------------------------------------------------------------------------------------------------------------------------------------------------------------------------------------------------------------------------------------------------------------------------------------------------------------------------|
|                       | disease physician; infectious disease doctor; internal medicine physician; microbiologist; neonatologist; neurologist; nuclear medicine physician; nephrologist; renal physician; renal doctor; urologist; oncologist; pharmacologist; pulmonologist; psychogeriatrician; ophthalmologist; rheumatologist; radiologist; respiratory physician; respiratory medicine physician; respiratory medicine doctor; palliative care physician; pathologist; sexual health physician; sexual health doctor; psychiatrist; psychiatry doctor; paediatrician; surgeon; surgery doctor; intensive care doctor; intensivist; intensive care physician; cardiothoracic |
|                       |                                                                                                                                                                                                                                                                                                                                                                                                                                                                                                                                                                                                                                                          |
| <b>CLINICAL FOCUS</b> |                                                                                                                                                                                                                                                                                                                                                                                                                                                                                                                                                                                                                                                          |
| • Allergy/Immunology  | Allergist; allergy; immunologist; immunology                                                                                                                                                                                                                                                                                                                                                                                                                                                                                                                                                                                                             |
| • Anaesthesiology     | Anesthesiologist; anaesthetist; anaesthesiologist; anaesthetist; anaesthesiology                                                                                                                                                                                                                                                                                                                                                                                                                                                                                                                                                                         |
| • Andrology           | Andrologist                                                                                                                                                                                                                                                                                                                                                                                                                                                                                                                                                                                                                                              |
| • Cardiology          | Cardiologist; cardiology                                                                                                                                                                                                                                                                                                                                                                                                                                                                                                                                                                                                                                 |
| • Dermatology         | Dermatologist; dermatology                                                                                                                                                                                                                                                                                                                                                                                                                                                                                                                                                                                                                               |
| • Emergency           | Emergency                                                                                                                                                                                                                                                                                                                                                                                                                                                                                                                                                                                                                                                |
| • Endocrinology       | endocrinologist; endocrinology; diabetologist; diabetology; diabetes                                                                                                                                                                                                                                                                                                                                                                                                                                                                                                                                                                                     |
| • Gastroenterology    | Gastroenterologist; gastroenterology; Hepatologist; hepatology                                                                                                                                                                                                                                                                                                                                                                                                                                                                                                                                                                                           |

|                                                                                        |                                                                 |
|----------------------------------------------------------------------------------------|-----------------------------------------------------------------|
| • Geriatrics                                                                           | Geriatrician; geriatric;<br>psychogeriatrician; elderly         |
| • Haematology                                                                          | Haematologist; haematology;<br>hematology; hematologist         |
| • Infectious Diseases                                                                  | Infectious disease; microbiologist;<br>microbiology             |
| • Internal Medicine                                                                    | Internal medicine                                               |
| • Intensive care                                                                       | Intensive care; intensivist; critical care                      |
| • Neonatology                                                                          | Neonatologist; neonatology; NICU;<br>neonatal                   |
| • Nuclear medicine                                                                     | Nuclear medicine                                                |
| • Nephrology                                                                           | Nephrologist, nephrology; renal; kidney                         |
| • Neurology                                                                            | Neurologist; neurology; epileptologist                          |
| • Obstetrics/Gynaecology                                                               | Gynaecologist; gynaecology;<br>obstetrician; OB/GYN; obstetrics |
| • Oncology                                                                             | Oncologist; oncology; cancer                                    |
| • Ophthalmology                                                                        | Ophthalmologist; ophthalmology                                  |
| • Otolaryngology                                                                       | Otolaryngology                                                  |
| • Palliative care                                                                      | Palliative care                                                 |
| • Pathology                                                                            | Pathologist; pathology                                          |
| • Pharmacology                                                                         | Pharmacologist; pharmacology                                    |
| • Paediatrics                                                                          | Paediatrician; paediatric*; pediatric*                          |
| • Psychiatry                                                                           | Psychiatrist; psychiatry; mental health                         |
| • Radiology                                                                            | Radiologist; radiology                                          |
| • Rheumatology                                                                         | Rheumatologist; rheumatology                                    |
| • Respiratory medicine                                                                 | Lung specialist; respiratory;<br>pulmonologist                  |
| • Sexual health                                                                        | Sexual health                                                   |
| • Surgery                                                                              | Surgeon; surgery; surgical; operating<br>theatre                |
| • Urology                                                                              | Urologist; urology                                              |
| *Note: the clinical focus is a proxy variable based on clinical specialty of attendees |                                                                 |

| and/or event description.     |                                                                                                                                            |
|-------------------------------|--------------------------------------------------------------------------------------------------------------------------------------------|
| EVENT TYPE                    |                                                                                                                                            |
| • Meeting (all inclusive/NOS) | Search for generic word “meeting”                                                                                                          |
| • Journal club                | Journal club; journalclub                                                                                                                  |
| • Inservice                   | Inservice                                                                                                                                  |
| • Workshop                    | Workshop                                                                                                                                   |
| • Grand rounds                | Grand round; grandround                                                                                                                    |
| • Scientific meeting          | scientific meeting; congress; conference<br>AND NOT<br>videoconference/teleconference                                                      |
| • Clinical meeting            | internal meeting; departmental meeting;<br>clinical meeting; case review, case<br>conference; case study meeting; case<br>study conference |
| • Multidisciplinary meeting   | Multidisciplinary meeting                                                                                                                  |

STROBE—Checklist of items that should be included in reports of *cross-sectional studies*

| Section/Topic             | Item # | Recommendation                                                                                                                                                                       | Reported on page # |
|---------------------------|--------|--------------------------------------------------------------------------------------------------------------------------------------------------------------------------------------|--------------------|
| Title and abstract        | 1      | (a) Indicate the study’s design with a commonly used term in the title or the abstract                                                                                               | Page 1, 2          |
|                           |        | (b) Provide in the abstract an informative and balanced summary of what was done and what was found                                                                                  | Page 2             |
| <b>Introduction</b>       |        |                                                                                                                                                                                      |                    |
| Background/rationale      | 2      | Explain the scientific background and rationale for the investigation being reported                                                                                                 | Page 4, 5          |
| Objectives                | 3      | State specific objectives, including any prespecified hypotheses                                                                                                                     | Page 5             |
| <b>Methods</b>            |        |                                                                                                                                                                                      |                    |
| Study design              | 4      | Present key elements of study design early in the paper                                                                                                                              | Page 5             |
| Setting                   | 5      | Describe the setting, locations, and relevant dates, including periods of recruitment, exposure, follow-up, and data collection                                                      | Page 5             |
| Participants              | 6      | (a) Give the eligibility criteria, and the sources and methods of selection of participants                                                                                          | Page 5             |
| Variables                 | 7      | Clearly define all outcomes, exposures, predictors, potential confounders, and effect modifiers. Give diagnostic criteria, if applicable                                             | Page 5,6           |
| Data sources/ measurement | 8*     | For each variable of interest, give sources of data and details of methods of assessment (measurement). Describe comparability of assessment methods if there is more than one group | Page 5,6           |
| Bias                      | 9      | Describe any efforts to address potential sources of bias                                                                                                                            | Methods: page 5, 6 |
| Study size                | 10     | Explain how the study size was arrived at                                                                                                                                            | Page 5,6           |
| Quantitative variables    | 11     | Explain how quantitative variables were handled in the analyses. If applicable, describe which groupings were chosen and why                                                         | Page 6             |
| Statistical methods       | 12     | (a) Describe all statistical methods, including those used to control for confounding                                                                                                | Page 6             |
|                           |        | (b) Describe any methods used to examine subgroups and interactions                                                                                                                  | N/A                |
|                           |        | (c) Explain how missing data were addressed                                                                                                                                          | N/A                |
|                           |        | (d) If applicable, describe analytical methods taking account of sampling strategy                                                                                                   | N/A                |
|                           |        | (e) Describe any sensitivity analyses                                                                                                                                                | N/A                |

|                          |     |                                                                                                                                                                                                              |            |
|--------------------------|-----|--------------------------------------------------------------------------------------------------------------------------------------------------------------------------------------------------------------|------------|
| <b>Results</b>           |     |                                                                                                                                                                                                              |            |
| Participants             | 13* | (a) Report numbers of individuals at each stage of study—eg numbers potentially eligible, examined for eligibility, confirmed eligible, included in the study, completing follow-up, and analysed            | Page 7     |
|                          |     | (b) Give reasons for non-participation at each stage                                                                                                                                                         | N/A        |
|                          |     | (c) Consider use of a flow diagram                                                                                                                                                                           | N/A        |
| Descriptive data         | 14* | (a) Give characteristics of study participants (eg demographic, clinical, social) and information on exposures and potential confounders                                                                     | Page 7     |
|                          |     | (b) Indicate number of participants with missing data for each variable of interest                                                                                                                          | N/A        |
| Outcome data             | 15* | Report numbers of outcome events or summary measures                                                                                                                                                         | 7-9        |
| Main results             | 16  | (a) Give unadjusted estimates and, if applicable, confounder-adjusted estimates and their precision (eg, 95% confidence interval). Make clear which confounders were adjusted for and why they were included | N/A        |
|                          |     | (b) Report category boundaries when continuous variables were categorized                                                                                                                                    | N/A        |
|                          |     | (c) If relevant, consider translating estimates of relative risk into absolute risk for a meaningful time period                                                                                             | N/A        |
| Other analyses           | 17  | Report other analyses done—eg analyses of subgroups and interactions, and sensitivity analyses                                                                                                               | N/A        |
| <b>Discussion</b>        |     |                                                                                                                                                                                                              |            |
| Key results              | 18  | Summarise key results with reference to study objectives                                                                                                                                                     | Page 10    |
| Limitations              | 19  | Discuss limitations of the study, taking into account sources of potential bias or imprecision. Discuss both direction and magnitude of any potential bias                                                   | Page 11    |
| Interpretation           | 20  | Give a cautious overall interpretation of results considering objectives, limitations, multiplicity of analyses, results from similar studies, and other relevant evidence                                   | Page 10-12 |
| Generalisability         | 21  | Discuss the generalisability (external validity) of the study results                                                                                                                                        | Page 10-12 |
| <b>Other information</b> |     |                                                                                                                                                                                                              |            |
| Funding                  | 22  | Give the source of funding and the role of the funders for the present study and, if applicable, for the original study on which the present article is based                                                | Page 15    |

\*Give information separately for cases and controls in case-control studies and, if applicable, for exposed and unexposed groups in cohort and cross-sectional studies.

**Note:** An Explanation and Elaboration article discusses each checklist item and gives methodological background and published examples of transparent reporting. The STROBE checklist is best used in conjunction with this article (freely available on the Web sites of PLoS Medicine at <http://www.plosmedicine.org/>, Annals of Internal Medicine at <http://www.annals.org/>, and Epidemiology at <http://www.epidem.com/>). Information on the STROBE Initiative is available at [www.strobe-statement.org](http://www.strobe-statement.org).

# BMJ Open

## A cross-sectional analysis of pharmaceutical industry-funded events for health professionals in Australia

|                                 |                                                                                                                                                                                                                                                                                                                                                                                                                                                                                                                                                                                                                                                                                                                                   |
|---------------------------------|-----------------------------------------------------------------------------------------------------------------------------------------------------------------------------------------------------------------------------------------------------------------------------------------------------------------------------------------------------------------------------------------------------------------------------------------------------------------------------------------------------------------------------------------------------------------------------------------------------------------------------------------------------------------------------------------------------------------------------------|
| Journal:                        | <i>BMJ Open</i>                                                                                                                                                                                                                                                                                                                                                                                                                                                                                                                                                                                                                                                                                                                   |
| Manuscript ID                   | bmjopen-2017-016701.R2                                                                                                                                                                                                                                                                                                                                                                                                                                                                                                                                                                                                                                                                                                            |
| Article Type:                   | Research                                                                                                                                                                                                                                                                                                                                                                                                                                                                                                                                                                                                                                                                                                                          |
| Date Submitted by the Author:   | 10-May-2017                                                                                                                                                                                                                                                                                                                                                                                                                                                                                                                                                                                                                                                                                                                       |
| Complete List of Authors:       | Fabbri, Alice; Universita degli Studi dell'Insubria, Centre of Research in Medical Pharmacology; The University of Sydney, Charles Perkins Centre and Faculty of Pharmacy<br>Grundy, Quinn; The University of Sydney, Charles Perkins Centre and Faculty of Pharmacy<br>Mintzes, Barbara; The University of Sydney, Charles Perkins Centre and Faculty of Pharmacy<br>Swandari, Swestika; The University of Sydney, Charles Perkins Centre and Faculty of Pharmacy<br>Moynihan, Ray; Bond University, Faculty of Health Sciences and Medicine; The University of Sydney, Sydney Medical School<br>Walkom, Emily; University of Newcastle,<br>Bero, Lisa; The University of Sydney, Charles Perkins Centre and Faculty of Pharmacy |
| <b>Primary Subject Heading</b>: | Public health                                                                                                                                                                                                                                                                                                                                                                                                                                                                                                                                                                                                                                                                                                                     |
| Secondary Subject Heading:      | Health policy, Public health                                                                                                                                                                                                                                                                                                                                                                                                                                                                                                                                                                                                                                                                                                      |
| Keywords:                       | Health policy < HEALTH SERVICES ADMINISTRATION & MANAGEMENT, PUBLIC HEALTH, EDUCATION & TRAINING (see Medical Education & Training)                                                                                                                                                                                                                                                                                                                                                                                                                                                                                                                                                                                               |
|                                 |                                                                                                                                                                                                                                                                                                                                                                                                                                                                                                                                                                                                                                                                                                                                   |

SCHOLARONE™  
Manuscripts

1  
2  
3  
4 1 **A cross-sectional analysis of pharmaceutical industry-funded events**  
5 2 **for health professionals in Australia**  
6  
7  
8 3  
9

10 4 Alice Fabbri, Quinn Grundy, Barbara Mintzes, Swestika Swandari, Ray Moynihan, Emily  
11 Walkom, Lisa A Bero  
12  
13

14 6  
15  
16  
17  
18 7 Alice Fabbri, PhD student, Centre of Research in Medical Pharmacology, University of Insubria,  
19 Varese, 21100, Italy

20 8  
21 9 Quinn Grundy, Postdoctoral Research Fellow, Charles Perkins Centre and Faculty of Pharmacy,  
22 The University of Sydney, Camperdown NSW 2006, Australia

23 10  
24 11 Barbara Mintzes, Senior Lecturer, Charles Perkins Centre and Faculty of Pharmacy,  
25 The University of Sydney, Camperdown NSW 2006, Australia

26 12  
27 13 Swestika Swandari, MPharm student, Charles Perkins Centre and Faculty of Pharmacy,  
28 The University of Sydney, Camperdown NSW 2006, Australia

29 14  
30 15 Ray Moynihan, Senior Research Fellow, Faculty of Health Sciences and Medicine,  
31 Bond University, QLD 4229, Australia

32 16  
33 17 Emily Walkom, Research Academic, School of Medicine and Public Health, University of Newcastle,  
34 NSW 2308, Australia

35 18  
36 19 Lisa A Bero, Professor, Charles Perkins Centre and Faculty of Pharmacy, The University of Sydney,  
37 Camperdown NSW 2006, Australia  
38  
39  
40  
41  
42  
43  
44  
45

46 22 **Corresponding author:**

47  
48  
49 23 Prof. Lisa A Bero, Email: [lisa.bero@sydney.edu.au](mailto:lisa.bero@sydney.edu.au)

50  
51 24 Telephone: +61 2 8627 1881  
52

53 25 **Word count:** 2522  
54  
55  
56  
57  
58  
59  
60



1  
2  
3 26  
4  
56 27 **Abstract**

9 28 **Objectives** To analyse patterns and characteristics of pharmaceutical industry sponsorship of  
10 29 events for Australian health professionals and to understand the implications of recent changes in  
11 30 transparency provisions that no longer require reporting of payments for food and beverages.  
12  
13  
14

15 31  
16 32 **Design** Cross-sectional analysis.  
17  
18  
19

20 34 **Participants and Setting** 301 publicly available company transparency reports downloaded  
21 35 from the website of Medicines Australia, the pharmaceutical industry trade association, covering  
22 36 the period from October 2011 to September 2015.  
23  
24  
25

26 37  
27 38 **Results** Forty-two companies sponsored 116,845 events for health professionals, on average 608  
28 39 per week with 30 attendees per event. Events typically included a broad range of health  
29 40 professionals: 82.0% included medical doctors, including specialists and primary care doctors,  
30 41 and 38.3% trainees. Oncology, surgery and endocrinology were the most frequent clinical areas  
31 42 of focus. Most events (64.2%) were held in a clinical setting. The median cost per event was  
32 43 AU\$ 263 (Interquartile range \$153-\$1,195) and over 90% included food and beverages.  
33  
34  
35  
36  
37  
38

39 45 **Conclusions** Over this four-year period, industry-sponsored events were widespread and  
40 46 pharmaceutical companies maintained a high frequency of contact with health professionals.  
41 47 Most events were held in clinical settings, suggesting a pervasive commercial presence in  
42 48 everyday clinical practice. Food and beverages, known to be associated with changes to  
43 49 prescribing practice, were almost always provided. New Australian transparency provisions  
44 50 explicitly exclude meals from the reporting requirements, thus a large proportion of potentially  
45 51 influential payments from pharmaceutical companies to health professionals will disappear from  
46 52 public view.  
47  
48  
49  
50  
51  
52  
53  
54  
55  
56  
57  
58  
59  
60

1  
2  
3 554  
5 566  
7  
8 57 **STRENGTHS AND LIMITATIONS OF THIS STUDY**

- 9
- 
- 10
- 
- 11 58
- 12 59 • From publicly available reports released under Australian transparency rules, we have
  - 13 60 created a searchable world-first database with details of more than 100,000 industry-
  - 14 61 sponsored events for health professionals, enabling researchers to analyse the intersection
  - 15 62 of pharmaceutical marketing and medical education.
  - 16 63 • In order to analyse the database, we iteratively identified a set of keywords for each
  - 17 64 variable of interest, however it is possible that some synonyms were missed.
  - 18 65 • We relied upon data as presented in the Medicines Australia transparency reports and we
  - 19 66 did not verify the accuracy and completeness of data.
  - 20 67 • Transparency requirements apply only to member companies, excluding manufacturers of
  - 21 68 generics, over-the-counter and non-member prescription medicine manufacturers, thus
  - 22 69 our analysis likely underestimates the true extent of industry sponsorship of events for
  - 23 70 health professionals.
  - 24 71
- 25
- 
- 26
- 
- 27
- 
- 28
- 
- 29
- 
- 30
- 
- 31
- 
- 32
- 
- 33
- 
- 34
- 
- 35
- 
- 36
- 
- 37
- 
- 38
- 
- 39
- 
- 40
- 
- 41
- 
- 42
- 
- 43
- 
- 44
- 
- 45
- 
- 46
- 
- 47
- 
- 48
- 
- 49
- 
- 50
- 
- 51
- 
- 52
- 
- 53
- 
- 54
- 
- 55
- 
- 56
- 
- 57
- 
- 58
- 
- 59
- 
- 60

## 72 Introduction

73

74

75 Full disclosure of financial relationships between the pharmaceutical industry and health  
76 professionals is a key strategy adopted to make these interactions more transparent. Many  
77 jurisdictions have recently introduced transparency provisions, including the United States (US)  
78 and the European Union, but the extent of the disclosure obligation varies. For example, meals  
79 and drinks fall outside the scope of disclosure obligations under new voluntary transparency  
80 provisions introduced by the European Federation of Pharmaceutical Industry Associations.(1)  
81 At the same time, in the US, over 100 medical societies recently backed a bill that would exempt  
82 pharmaceutical and medical device companies from reporting an entire category of payments to  
83 doctors: those related to continuing medical education.(2)

84

85 Australia was one of the first countries to move towards public reporting of these payments.  
86 Since 2007, Medicines Australia, the trade association of the prescription medicines industry, has  
87 required member companies to provide detailed reports of sponsorship of events for health  
88 professionals, which include company-initiated events, sponsored events organised by a third  
89 party, trade displays at educational events and sponsorship of healthcare professionals to attend  
90 events both in Australia and overseas.(3) The reports are published on the Medicines Australia  
91 website and include events for all registered healthcare professionals, making Australia one of  
92 the few countries with transparency extending to non-physicians.(4,5) These disclosure  
93 provisions were a condition for approval of Medicines Australia's Code of Conduct by the  
94 Australian Competition and Consumer Commission and were upheld following a legal appeal by  
95 industry.(6) Changes to this policy were introduced in 2015, with the focus on events replaced by  
96 disclosure of payments to individuals.(3) The reports detailing event sponsorship and aggregate  
97 payments to health professionals have been discontinued, and replaced with reports of payments  
98 to named individuals, similar to the Open Payments database in the US. Moreover, the new Code  
99 no longer requires reporting of payments for food and beverages.

100

1  
2  
3 101 At a time when disclosure policies are being debated and revised in several settings,(1,2,3)  
4  
5 102 Australian data can provide valuable insights into patterns of industry sponsorship and on  
6  
7 103 characteristics of transparency provisions that are needed to capture expenditures of  
8  
9 104 pharmaceutical companies on health professionals. Apart from two analyses of data from the first  
10  
11 105 six months of the Australian disclosure scheme,(4,7) and one brief report on events involving  
12  
13 106 nurses,(5) no comprehensive longer-term analyses have been conducted.  
14

15  
16 108 The objectives of this cross-sectional analysis are: to describe the nature and frequency of events  
17  
18 109 for health professionals sponsored by pharmaceutical companies that are members of Medicines  
19  
20 110 Australia; to create an open-access searchable database of these events; and to estimate the  
21  
22 111 information that will be lost under newly introduced reporting standards.  
23

24 112

25 113

## 26 114 **Methods**

27 115

### 28 116 *Data Sources*

29 117

30 118 We downloaded all the available reports from the Medicines Australia website  
31  
32 119 ([www.medicinesaustralia.com.au](http://www.medicinesaustralia.com.au)) in PDF format. The 301 PDF reports of approximately 15,000  
33  
34 120 pages covered the period October 2011 to September 2015. The PDFs had been originally  
35  
36 121 created in Microsoft Excel. We requested the original Excel files from Medicines Australia but  
37  
38 122 were refused on the basis that member companies had not given permission for their release. We  
39  
40 123 converted the PDF files into Excel format using free, online converter programs, cleaned the data  
41  
42 124 to address errors introduced during file conversion, and ensured consistency of reporting in each  
43  
44 125 column.  
45

46 126 The reports cover information on the sponsoring company, timing, venue type, number and  
47  
48 127 profession of participants, hospitality and travel for attendees, room rentals and equipment, and  
49  
50 128 speaker honoraria.(3)  
51

52 129  
53  
54  
55  
56  
57  
58  
59  
60

1  
2  
3 130 Over this four-year period, 47 pharmaceutical companies issued transparency reports and we  
4  
5 131 grouped them based on mergers and acquisitions as of March 31<sup>st</sup> 2016. Therefore our analysis  
6  
7 132 included 42 Medicines Australia member companies; as a frame of reference there are  
8  
9 133 approximately 140 separate companies listed as suppliers to the Australian Pharmaceutical  
10  
11 134 Benefit Scheme.(8)

12 135

13 136

### 16 137 *Coding*

17 138

19 139 We designed a coding scheme based on the available data and variables of theoretical interest  
20  
21 140 based on the literature on industry-professional interactions(9,10) and on two previous analyses  
22  
23 141 of data from the first six months of the Australian disclosure scheme.(4,7) The research team  
24  
25 142 iteratively developed a set of keywords to define each variable of interest (Supplementary File  
26  
27 143 1). Using Excel's filter function, we used the keywords to search the unstructured descriptive  
28  
29 144 text and to dichotomously code event features as "present/absent", for the following variables:

- 30 145 • sponsoring companies, grouped based on mergers and acquisitions as of March 31<sup>st</sup> 2016;
- 31  
32 146 • geographical location by Australian state or overseas location;
- 33  
34 147 • professional status of attendees (e.g. specialists, nurses, trainees);
- 35  
36 148 • clinical focus based on clinical specialty of attendees and event description (e.g.  
37  
38 149 oncology, endocrinology, cardiology);
- 39 150 • type of event (e.g. journal club, workshop, in-services);
- 40  
41 151 • type of hospitality provided (e.g. breakfast, lunch, dinner)
- 42

43 152

### 45 153 *Statistical analysis*

46 154

48 155 We present frequency tables for the characteristics of the events, and median spending levels per  
49  
50 156 event and company. Cost variables are reported in AU\$. As the data were not normally  
51  
52 157 distributed, we used Mann-Whitney U tests for the differences between medians. Analyses were  
53  
54 158 performed using SPSS-Version 22.

55 159

56

57

58

59

60

1  
2  
3 160 **Results**  
4

5 161  
6

7 162 *General Overview*  
8

9 163  
10

11 164

12 165 From October 2011 to September 2015, 42 pharmaceutical companies in Australia sponsored  
13  
14 166 116,845 events involving health professionals. On average, there were 2,434 events per month  
15  
16 167 and 608 events per week. Each year, the number of events sharply decreased in December  
17  
18 168 through February, likely reflecting the holiday season.  
19

20 169

21 170 Table 1 provides illustrative examples of sponsored events as presented verbatim in the company  
22  
23 171 reports, chosen to reflect variations in reporting and event type. Events varied greatly in scope  
24  
25 172 and intensity, ranging from a half hour journal club with sandwiches in a hospital meeting room,  
26  
27 173 to a several day conference with overseas flight, accommodation and hospitality provided. The  
28  
29 174 professional status was sometimes described generically as “healthcare professionals” or  
30  
31 175 contained a list of the professions in attendees. The level of detail companies reported regarding  
32  
33 176 the program’s content and the extent of explicit product promotion also varied; most of the event  
34  
35 177 descriptions were disease-focused (e.g. “Journal Club on Chronic Obstructive Pulmonary  
36  
37 178 Disease”) but in some cases the events mentioned specific drug names (e.g. “Introducing Zoely  
38  
39 179 and other Emerging Trends in Contraception”).  
40

41  
42  
43  
44  
45  
46  
47  
48  
49  
50  
51  
52  
53  
54  
55  
56  
57  
58  
59  
60

1  
2  
3 181 *Attendees*  
4  
5 182

6 183 Over this four-year period, there were 3,481,750 individual attendances at industry-  
7  
8 184 sponsored events. The median number of event attendees was 18 (interquartile range  
9  
10 185 (IQR) 12-25); 97.2% (n=113,595) of the events had fewer than 100 attendees and  
11  
12 186 0.2% (n=210) had more than 1000 participants. Over 40% (n=47,084) of events  
13  
14 187 included participants from multiple professions. Table 2 lists the professional status of  
15  
16 188 attendees and the most frequent clinical areas of focus for the events. Events were  
17  
18 189 most frequently oncology-related, while otolaryngology and andrology were least  
19  
20 190 represented.

21 191  
22 192 *Location and characteristics of sponsored events*  
23 193

24 194 Three quarters of events were held in the three Australian states with the largest  
25  
26 195 populations: New South Wales (30.7%, n=35,888), Victoria (26.9%, n=31,448), and  
27  
28 196 Queensland (18.8%, n= 21,963), and few were held overseas (1.9%, n= 2,262).  
29  
30 197 Nearly two thirds of events (64.2%, n=74,998) were held in a clinical setting, such as  
31  
32 198 hospitals, clinics or doctors' offices. Non-clinical venues included restaurants, hotels  
33  
34 199 and convention centres. One third of the events were described as a generic "meeting"  
35  
36 200 (37.5%, n=43,810) while others were described as journal clubs (28.5%, n=33,281),  
37  
38 201 clinical meetings (3%, n=3,533), grand rounds (3.8%, n=4,472), in-services (2.6%,  
39  
40 202 n=3,038), or workshops (2.6%, n=3,029). Only 4.2% (n=4,290) were described as  
41  
42 203 scientific meetings (e.g. conferences or congresses).

43 204  
44 205 *Costs and hospitality*  
45 206

46 207 Reporting companies spent AU\$ 286,117,928 on events for health professionals. On  
47  
48 208 average, companies spent AU\$ 2,449 per event (SD \$15,020) while the median cost  
49  
50 209 was AU\$ 263 (IQR \$153-\$1,195). The median cost per person was AU\$ 14 (IQR  
51  
52 210 \$10- \$68). In 81.7% of the events (n=95,483) the costs were below AU\$ 100 per  
53  
54 211 attendee and in 2.1% (n=2,438) the costs were over AU\$ 1000 per attendee.  
55  
56 212

1  
2  
3 213 Table 3 shows the median cost per person by characteristics of events. The median  
4 214 total cost per person was significantly higher when the event format was a scientific  
5 215 meeting such as a congress or conference (AU\$ 93, IQR \$33-659) compared with  
6 216 other event types ( $p<0.001$ ), for events held overseas (AU\$ 710, IQR \$91-7,300)  
7 217 compared with events held in Australia ( $p<0.001$ ) or outside the clinical settings  
8 218 (AU\$ 91, IQR \$28-154) as compared with events in the clinical setting ( $p<0.001$ ).  
9  
10  
11  
12

13  
14  
15 220 Reported “hospitality or financial support” provided to attendees included registration  
16 221 fees, travel, accommodation, parking and food and beverage. Food was provided at  
17 222 90.4% ( $n=105,667$ ) of events: 22.2% included lunches ( $n=25,935$ ), 17.0% dinners  
18 223 ( $n=19,873$ ), 12.0% teas ( $n=14,067$ ), 11.0% breakfasts ( $n=12,806$ ), 2.7% were all-day  
19 224 events with meals ( $n=3,113$ ), and for 25.6% ( $n=29,873$ ), type of food and beverage  
20 225 was unspecified. Total cost of food was more than AU\$ 84 million (AU\$ 84,862,791),  
21 226 accounting for 29.7% of the total cost of these functions. However, for 65%  
22 227 ( $n=75,949$ ) of events, the total listed cost for food and beverage was equal to the listed  
23 228 total cost of the event, indicating that the company’s sponsorship extended to food  
24 229 and beverage only. The median cost of food per person was AU\$ 12 (IQR \$8-\$20).  
25  
26  
27  
28  
29  
30  
31

### 32 230 33 231 *The top companies*

34 232  
35  
36 233 Of the 42 pharmaceutical companies that provided reports, the top five in terms of the  
37 234 numbers of sponsored events were AstraZeneca, Novartis, Merck Sharp & Dohme,  
38 235 Roche, and Pfizer (Table 4). Boehringer Ingelheim had the highest cost per event with  
39 236 a median cost of AU\$ 2,007 (IQR \$1,308-\$2,654), while Eli Lilly spent the least with  
40 237 a median cost per function of AU\$ 145 (IQR \$62-\$455). Table 4 provides an  
41 238 overview of event sponsorship by the top 20 companies, representing 87.8% of  
42 239 events.  
43  
44  
45  
46  
47  
48

### 49 240 50 241 *Availability of database*

51 242 The analysable dataset in CSV file format we have created is available at: doi [to be  
52 243 inserted prior to publication]  
53  
54  
55  
56  
57  
58  
59  
60



1  
2  
3 245 **Discussion**  
4  
5 246

6 247 Pharmaceutical industry-funded events for health professionals were frequent and  
7  
8 248 pervasive with almost three and a half million individual attendances at over 116,000  
9  
10 249 events in the four-year period between 2011 and 2015. As a frame of reference, in  
11 250 2014 there were 610,148 registered health professionals in Australia,(11) suggesting  
12  
13 251 that there was wide exposure to these events. Events typically included a broad range  
14  
15 252 of professionals and multidisciplinary teams, including most commonly: medical  
16  
17 253 specialists, nurses, trainees and primary care doctors. Nearly two-thirds of events  
18  
19 254 were held in clinical settings. Average costs per person were modest and the vast  
20  
21 255 majority of events (90.4%) included the provision of food and beverages.  
22  
23 256 Additionally, for most events (65%), the only funding provided was for food and  
24  
25 257 beverages. Thus, our analysis suggests that the new Australian and European  
26  
27 258 transparency rules will decrease transparency because hospitality in the form of food  
28  
29 259 and/or beverages will be exempt from reporting.(1,3)  
30

31 261 Although professional education is critical for improving patient care, previous  
32  
33 262 studies of internal pharmaceutical industry documents have shown that sponsored  
34  
35 263 events have been effectively used as a marketing tool.(12,13) A systematic review  
36  
37 264 from 2010 found that with rare exceptions, exposure to pharmaceutical industry  
38  
39 265 information is associated with either no effect on prescribing or with adverse effects  
40  
41 266 such as lower prescribing quality, higher frequency or costs.(14) More recently,  
42  
43 267 analyses of the Open Payments database in the US, have shown that payments for  
44  
45 268 educational training and even the provision of low cost free meals, commonly  
46  
47 269 provided at sponsored events, are associated with increased prescribing of promoted,  
48  
49 270 costly, brand-name medications.(15,16)  
50

51 271  
52  
53 272 Finally, we also found a high prevalence of trainee attendance at these events.  
54  
55 273 Targeting medical trainees can lead to a process of normalisation and enculturation  
56  
57 274 while trainees develop their professional identity.(17) This has been described as an  
58  
59 275 effective strategy “to influence physicians from the bottom up.”(13) Medical school  
60  
276 policies limiting trainee-industry interaction have been associated with a shift in

1  
2  
3 277 attitude (18) and reduced prescribing of costly new medicines without therapeutic  
4 278 advantages.(19)

5  
6 279

7  
8 280 Our study has a number of limitations. First, we relied on reports submitted by  
9 281 companies to Medicines Australia and could not verify the accuracy and completeness  
10 282 of data. Second, since the Code of Conduct's transparency reporting requirements  
11 283 applies only to members of Medicines Australia, the available reports likely  
12 284 underestimate the true extent of industry sponsorship of events for health  
13 285 professionals. Our analysis included only 42 Medicines Australia member companies;  
14 286 as a frame of reference approximately 140 manufacturers are listed as suppliers to the  
15 287 Australian Pharmaceutical Benefit Scheme.(8) Moreover, non-member manufacturers  
16 288 of branded prescription medicines, generic medicines, over-the-counter medicines and  
17 289 medical devices are not covered by the Medicines Australia Code. Third, with regard  
18 290 to the coding scheme, the research team identified a set of keywords to define each  
19 291 variable of interest and it is possible that some synonyms were missed due to  
20 292 variability in the data provided. Fourth, we did not assess the content of events due to  
21 293 the unstructured and variable nature of reporting. Fifth, our analysis focuses on  
22 294 industry sponsorship of events and did not examine differences in how event  
23 295 organizers manage potential influences. Finally, costs were not adjusted for inflation  
24 296 as this would likely have a limited impact on the Australian dollar over such a short  
25 297 time period. Notwithstanding these limitations, we have conducted a cross-sectional  
26 298 analysis of the only publicly available data on industry-sponsored events for health  
27 299 professionals.

30  
31  
32  
33  
34  
35  
36  
37  
38  
39  
40  
41 300

42  
43 301 In conclusion, our findings have several international implications for future research  
44 302 and policy initiatives. While Australian transparency reports are difficult to analyse  
45 303 due to their format, we have created an open-access searchable world-first database  
46 304 with details of more than 100,000 industry-sponsored events, enabling researchers to  
47 305 analyse the intersection of pharmaceutical marketing and medical education.  
48 306 Although the data included in this analysis are from Australia, pharmaceutical  
49 307 companies are transnational corporations whose practices are likely to be similar  
50 308 across different countries. Moreover, individual institutions such as hospitals or  
51 309 universities may use these data to see what industry-sponsored activities are

1  
2  
3 310 happening within their own backyards, and whether they meet contemporary  
4  
5 311 expectations for transparency and independence.  
6  
7 312

8 313 At the policy level, at a time when new rules are being debated and revised globally,  
9  
10 314 our findings underscore the need for more disclosure, not less. Transparency rules  
11 315 should be as inclusive as possible with regard to the type of companies required to  
12 316 report and also in terms of the scope of payments and categories of health  
13 317 professionals covered. The onus of reporting should not be on the industry only; for  
14 318 example, public sector hospitals as well as universities and professional associations  
15 319 could report meal subsidies from pharmaceutical and device manufacturers. A  
16 320 stronger policy option, already implemented at several academic medical centres in  
17 321 the US, would be to eliminate the provision of free food by manufacturers.(20) In the  
18 322 long term, ways of expanding funding for independent continuing professional  
19 323 education should be explored. There are already case studies showing that  
20 324 independence from industry sponsorship is achievable. For example the University of  
21 325 Michigan, as well as other major medical institutions in the US, no longer accept  
22 326 commercial support for continuing medical education.(21,22) This sets a valuable  
23 327 example that could become a model for other institutions. In the short term,  
24 328 universities and professional associations should make health professionals more  
25 329 aware of the independent sources of information on drugs that are already available  
26 330 (e.g. NPSMedicineWise, the Australian Medicines Handbook and the independent  
27 331 drug bulletins).  
28  
29  
30  
31  
32  
33  
34  
35  
36  
37  
38  
39  
40

41 332  
42 333 Finally, our findings highlight that transparency requirements likely capture only a  
43 334 portion of industry sponsorship of events for health professionals. Changes to the  
44 335 transparency requirements will likely exacerbate this issue by excluding common  
45 336 categories of payments. Thus, decision-makers should be aware of the extent of  
46 337 industry-sponsored activity which will be hidden if “free food” fails to be included in  
47 338 future transparency regimes.  
48  
49  
50

51 339

52 340

53 341

54 342  
55  
56  
57  
58  
59  
60

**References**

1. EFPIA Code on disclosure of transfers of value from pharmaceutical companies to healthcare professionals and healthcare organisations. 6 June 2014. <http://transparency.efpia.eu/uploads/Modules/Documents/efpia-disclosure-code-2014.pdf> (accessed on 5 September 2016).
2. Rubenfire A. Doctors back bill to exempt CME from Open Payments reporting. Modern Healthcare. 22 July 2016. <http://www.modernhealthcare.com/article/20160722/NEWS/160729951> (accessed on 5 September 2016)
3. Medicines Australia, Code of Conduct Edition 18, 2015. <https://medicinesaustralia.com.au/wp-content/uploads/sites/52/2010/01/20150617-PUB-Code-Edition-18-FINAL.pdf> (accessed on 20 September 2016).
4. Robertson J, Walkom E, Moynihan R, et al. Pharmaceutical industry funding of educational events for pharmacists in Australia: an analysis of data from the first 6 months of a mandatory disclosure programme. International Journal of Pharmacy Practice 2010;18(2):88-92.
5. Grundy Q, Fabbri A, Mintzes B, Swandari S, Bero L. The Inclusion of Nurses in Pharmaceutical Industry–Sponsored Events. Guess Who Is Also Coming to Dinner? JAMA Intern Med 2016;176(11):1718-1720. doi:10.1001/jamainternmed.2016.5276
6. Australian Competition and Consumer Commission. Australian competition tribunal affirms ACCC's decision on extra reporting for Medicines Australia Code. Press release, 27 June 2007. <http://www.accc.gov.au/content/index.phtml/itemId/790845/fromItemId/621589?pageDefinitionItemId=16940> (accessed on 5 September 2016).
7. Robertson J, Moynihan R, Walkom E, et al. Mandatory Disclosure of Pharmaceutical Industry-Funded Events for Health Professionals. PLoS Med 2009; 6(11): e1000128.
8. Department of industry, Innovation and Science of the Australian Government. Pharmaceuticals Industry Profile.

- 1  
2  
3 375 [https://industry.gov.au/industry/IndustrySectors/PharmaceuticalsandHealthTec](https://industry.gov.au/industry/IndustrySectors/PharmaceuticalsandHealthTechnologies/Pharmaceuticals/Pages/PharmaceuticalsIndustryProfile.aspx)  
4 376 [hnologies/Pharmaceuticals/Pages/PharmaceuticalsIndustryProfile.aspx](https://industry.gov.au/industry/IndustrySectors/PharmaceuticalsandHealthTechnologies/Pharmaceuticals/Pages/PharmaceuticalsIndustryProfile.aspx)  
5  
6 377 (accessed on 3 April 2017).  
7  
8 378 9. Henry DA, Hill SR, Doran E, et al. Medical specialists and pharmaceutical  
9 379 industry-sponsored research: a survey of the Australian experience. *Med J*  
10 380 *Aust* 2005;182(11):557-60.  
11  
12 381 10. Wazana A. Physicians and the pharmaceutical industry: is a gift ever just a  
13 382 gift? *JAMA* 2000;283(3):373-80.  
14  
15 383 11. Australian Institute of Health and Welfare.  
16 384 <http://www.aihw.gov.au/workforce/> (accessed on 16 November 2016).  
17  
18 385 12. Moynihan R. Doctors' education: the invisible influence of drug company  
19 386 sponsorship. *BMJ* 2008;336:416-7.  
20  
21 387 13. Steinman MA, Bero LA, Chren MM, Landefeld CS. Narrative review: the  
22 388 promotion of gabapentin: an analysis of internal industry documents. *Ann*  
23 389 *Intern Med* 2006;145(4):284-93.  
24  
25 390 14. Spurling G, Mansfield P, Montgomery BD, et al. Information from  
26 391 pharmaceutical companies and the quality, quantity, and cost of physicians'  
27 392 prescribing: a systematic review. *PLoS Med* 2010;7(10):e1000352.  
28  
29 393 15. Yeh JS, Franklin JM, Avorn J, et al. Association of Industry Payments to  
30 394 Physicians With the Prescribing of Brand-name Statins in Massachusetts.  
31 395 *JAMA Intern Med* 2016;176(6):763-8.  
32  
33 396 16. DeJong C, Aguilar T, Tseng C, et al. Pharmaceutical Industry-Sponsored  
34 397 Meals and Physician Prescribing Patterns for Medicare Beneficiaries. *JAMA*  
35 398 *Intern Med* 2016;176(8):1114-10.  
36  
37 399 17. Austad KE, Avorn J, Kesselheim AS. Medical students' exposure to and  
38 400 attitudes about the pharmaceutical industry: a systematic review. *PLoS Med*  
39 401 2011;8(5):e1001037.  
40  
41 402 18. Kao AC, Braddock C, Clay M, et al. Effect of educational interventions and  
42 403 medical school policies on medical students' attitudes toward pharmaceutical  
43 404 marketing practices: a multi-institutional study. *Acad Med* 2011; 86(11):  
44 405 1454-62.  
45  
46  
47  
48  
49  
50  
51  
52  
53  
54  
55  
56  
57  
58  
59  
60

- 1  
2  
3 406 19. King M, Essick C, Bearman P, Ross JS. Medical school gift restriction  
4 407 policies and physician prescribing of newly marketed psychotropic  
5 408 medications: difference-in-differences analysis. *BMJ* 2013; 346: f264.  
6  
7  
8 409 20. American Medical Student Association. Conflict of Interest Policies at  
9 410 Academic Medical Centers. Scorecard 2014. <http://amsascorecard.org/>  
10 411 (accessed on 4 November 2016).  
11  
12 412 21. Hutchinson RJ, Woolliscroft JO, Roll LC. U-M Medical School plans changes  
13 413 to Continuing Medical Education funding. Available at:  
14 [http://www.uofmhealth.org/u-m-medical-school-plans-changes-continuing-  
16 415 medical-education-funding](http://www.uofmhealth.org/u-m-medical-school-plans-changes-continuing-<br/>15 414 medical-education-funding) (accessed on 6 April 2017).  
17  
18 416 22. Smith SR, Hams M, Wilkinson W. Policy Guide for Academic Medical  
19 417 Centers and Medical Schools. Toolkit on Continuing Medical Education.  
20 Available at: [http://www.communitycatalyst.org/doc-  
22 419 store/publications/CME\\_toolkit.pdf](http://www.communitycatalyst.org/doc-<br/>21 418 store/publications/CME_toolkit.pdf) (accessed on 6 April 2017).  
23  
24  
25  
26  
27  
28  
29  
30  
31  
32  
33  
34  
35  
36  
37  
38
- 

39 426 **Contributors:** AF, QG, BM, RM, LB conceived of the study. AF, QG, BM, RM, EW  
40 427 designed the coding scheme. AF, QG and SS acquired and analysed all data. AF  
41 428 drafted the manuscript. All the authors contributed to the writing of the paper and  
42 429 approved the final version. AF is the guarantor.

43  
44  
45  
46 430 **Funding:** The work was partially funded via a University of Sydney Faculty of  
47 431 Pharmacy summer scholarship.

48  
49  
50 432  
51 433 **Role of the Funder/Sponsor:** The funding source had no role in the design and  
52 434 conduct of the study; collection, management, analysis, and interpretation of the data;  
53 435 preparation, review, or approval of the manuscript; and decision to submit the  
54 436 manuscript for publication.

1  
2  
3 437  
4  
5

6 438 **Competing interests:** All authors have completed the ICMJE uniform disclosure  
7 439 form at [www.icmje.org/coi\\_disclosure.pdf](http://www.icmje.org/coi_disclosure.pdf) (available on request from the  
8  
9 440 corresponding author). Dr. Mintzes reports that she was an expert witness on behalf of  
10 441 plaintiffs in a Canadian class action suit concerning cardiovascular risks of a  
11 442 testosterone gel. None of the authors received any payments, funding, or other  
12 443 financial support from pharmaceutical manufacturers. The authors declare no other  
13 444 relationships or activities that could appear to have influenced the submitted work.  
14  
15  
16  
17

18 445  
19

20  
21 446 **Ethical approval:** Not required.  
22  
23

24 447  
25

26 448 **Data sharing:** Upon acceptance for publication, the full dataset will be made  
27 449 available as a CSV file with a link in the publication.  
28  
29

30 450  
31

32 451 **Access to the data:** All authors had full access to all of the data (including statistical  
33 452 reports and tables) in the study and can take responsibility for the integrity of the data  
34 453 and the accuracy of the data analysis.  
35  
36  
37

38 454  
39

40 455  
41

42 456  
43

44 457  
45

46 458  
47

48 459  
49

50 460  
51

52 461  
53

54 462  
55

56 463  
57  
58  
59  
60

1  
2  
3 464  
4  
5 465  
6  
7  
8  
9  
10  
11  
12  
13  
14  
15  
16  
17  
18  
19  
20  
21  
22  
23  
24  
25  
26  
27  
28  
29  
30  
31  
32  
33  
34  
35  
36  
37  
38  
39  
40  
41  
42  
43  
44  
45  
46  
47  
48  
49  
50  
51  
52  
53  
54  
55  
56  
57  
58  
59  
60

For peer review only



1  
2  
3  
4  
5  
6  
7 466  
8  
9 **Tables and Boxes**  
10  
11 467  
12  
13 468 Table 1. Illustrative examples of industry sponsored events\*  
14  
15 469

| Company     | Date      | Event content                                                                                                                                                                                   | Venue                           | Professional status of attendees       | Hospitality provided                              | Total Cost of Hospitality | Number of attendees | Total costs of function                          |
|-------------|-----------|-------------------------------------------------------------------------------------------------------------------------------------------------------------------------------------------------|---------------------------------|----------------------------------------|---------------------------------------------------|---------------------------|---------------------|--------------------------------------------------|
| Astrazeneca | Sep. - 15 | Educational Event - Dinner meeting<br>Going for Goal: Optimising Treatment in Type 2 Diabetes and Incretin Based Therapies; and On the Road to Glycemic Control.<br>2 hours educational content | Hotel Realm Barton, ACT         | General Practice Nursing Endocrinology | Dinner with Alcoholic and Non Alcoholic Beverages | \$2,087.27                | 32                  | \$3,305.45 includes 1 speaker fee for \$1,218.18 |
| Astrazeneca | Mar. - 15 | Educational Event - Lunch meeting Restless Legs. 1 hour educational content                                                                                                                     | The Golden Horse Footscray, VIC | General Practice Respiratory Medicine  | Lunch                                             | \$248.82                  | 10                  | \$848.82 includes speaker fee for \$600          |

1  
2  
3  
4  
5  
6  
7  
8  
9  
10  
11  
12  
13  
14  
15  
16  
17  
18  
19  
20  
21  
22  
23  
24  
25  
26  
27  
28  
29  
30  
31  
32  
33  
34  
35  
36  
37  
38  
39  
40  
41  
42  
43  
44  
45  
46  
47  
48  
49

|                           |              |                                                                                                      |                                                                   |                                                                                                            |                                                                                                                                   |                                                                                 |     |                                                                                                      |
|---------------------------|--------------|------------------------------------------------------------------------------------------------------|-------------------------------------------------------------------|------------------------------------------------------------------------------------------------------------|-----------------------------------------------------------------------------------------------------------------------------------|---------------------------------------------------------------------------------|-----|------------------------------------------------------------------------------------------------------|
| Novartis                  | Feb. -<br>15 | Sponsorship of Journal Club on:<br>Chronic Obstructive Pulmonary<br>Disease 1 hr educational content | Gold<br>Coast<br>Universit<br>y Hospital<br>Southport<br>,<br>QLD | Medical<br>Students,<br>Nurses,<br>Pharmacists                                                             | Afternoon<br>Tea                                                                                                                  | \$184<br>includes<br>Food &<br>Beverages<br>for 20<br>delegates<br>\$184        | 20  | \$184 includes Total<br>Hospitality : \$184                                                          |
| Novartis                  | Mar. -<br>14 | Sponsorship of Day Seminar on:<br>Immunosuppressant<br>8 hrs educational content                     | Alfred<br>Health<br>Melbourn<br>e, VIC                            | Cardiologists<br>, Nurses,<br>Registrars,<br>Renal<br>Physicians,<br>Surgeons,<br>Transplant<br>Physicians | Breakfast,<br>Coffee,<br>Lunch,<br>Afternoon<br>Tea, Light<br>Refreshme<br>nts,<br>Morning<br>Tea, Non-<br>Alcoholic<br>Beverages | \$2,498<br>includes<br>Food &<br>Beverages<br>for 120<br>delegates :<br>\$2,498 | 120 | \$2,665 Includes<br>Total Hospitality :<br>\$2,498 Speaker Costs:<br>Meal (for 8 speakers):<br>\$167 |
| Merck<br>Sharp &<br>Dohme | Oct. -<br>11 | Oncology Journal Club [hours of<br>education = 1]                                                    | Mercy<br>Women's<br>Hospital,                                     | Oncologists,<br>Nurses                                                                                     | Food &<br>beverages                                                                                                               | food & bev<br>19.64,<br>Total                                                   | 5   | Total Costs \$19.64                                                                                  |

|                               |           |                                                                                                                       |                                                    |                                                                         |                  |                                                  |    |                                                                         |
|-------------------------------|-----------|-----------------------------------------------------------------------------------------------------------------------|----------------------------------------------------|-------------------------------------------------------------------------|------------------|--------------------------------------------------|----|-------------------------------------------------------------------------|
| Australia                     |           |                                                                                                                       | Heidelberg, VIC                                    |                                                                         |                  | Hospitality<br>19.64                             |    |                                                                         |
| Merck Sharp & Dohme Australia | Oct. - 11 | Evening educational meeting "Introducing Zoely and other Emerging Trends in Contraception" [hours of education = 2.5] | Boathouse by the Lake, Barton, ACT                 | Obstetricians and Gynaecologist                                         | Food & beverages | food & bev 1432.72,<br>Total Hospitality 1432.72 | 25 | speaker fee 688.36,<br>speaker food & bev \$59.07, Total Cost \$2180.15 |
| Roche Products                | Apr. - 14 | Multi Disciplinary Breast Cancer Clinical Review Meeting<br>Educational Content = 1hr                                 | Royal Adelaide Hospital North Terrace Adelaide, SA | Surgery Doctor<br>Oncology Doctor<br>Oncology Nurse<br>Pathology Doctor | Lunch            | 247                                              | 13 | 247                                                                     |
| Roche Products                | Jan. - 13 | Grand Rounds<br>Educational Content = 1 hr 15 mins                                                                    | Bunbury Regional Hospital Bussell Highway          | Hospital Healthcare Professionals                                       | Lunch            | \$272                                            | 20 | \$272                                                                   |

1  
2  
3  
4  
5  
6  
7  
8  
9  
10  
11  
12  
13  
14  
15  
16  
17  
18  
19  
20  
21  
22  
23  
24  
25  
26  
27  
28  
29  
30  
31  
32  
33  
34  
35  
36  
37  
38  
39  
40  
41  
42  
43  
44  
45  
46  
47  
48  
49

|                     |              |                                                                                                                                                                                                                       |                                                                 |                                                              |                                                                                                                                                                    |         |    |             |
|---------------------|--------------|-----------------------------------------------------------------------------------------------------------------------------------------------------------------------------------------------------------------------|-----------------------------------------------------------------|--------------------------------------------------------------|--------------------------------------------------------------------------------------------------------------------------------------------------------------------|---------|----|-------------|
|                     |              |                                                                                                                                                                                                                       | Bunbury,<br>WA                                                  |                                                              |                                                                                                                                                                    |         |    |             |
| Pfizer<br>Australia | Apr. -<br>13 | Pfizer Australia provided<br>Sponsorship for Healthcare<br>Professional to attend The<br>European Congress of Clinical<br>Microbiology and Infectious<br>Disease (ECCMID) 2013.<br>Educational Content - 33.75 hr(s). | Internatio<br>nal<br>Congress<br>Centrum,<br>Berlin,<br>Germany | Infectious<br>Disease<br>Specialist                          | Registratio<br>n Fee (1<br>attende<br>e<br>\$878),<br>Travel<br>(Flights<br>\$8,196,<br>Transfers<br>\$219),<br>Accommod<br>ation (6<br>Room<br>Nights<br>\$1,562) | \$10855 | 1  | \$10,855.00 |
| Pfizer<br>Australia | Jun. -<br>15 | Journal Club - Chronic Pain,<br>Educational Content - 1 hr(s).                                                                                                                                                        | Peter<br>MacCallu<br>m Cancer<br>Centre,<br>East                | Palliative<br>Care Nurse;<br>Palliative<br>Care<br>Physician | Meal /<br>Drinks                                                                                                                                                   | \$156   | 15 | \$156       |

1  
2  
3  
4  
5  
6  
7  
8  
9  
10  
11  
12  
13  
14  
15  
16  
17  
18  
19  
20  
21  
22  
23  
24  
25  
26  
27  
28  
29  
30  
31  
32  
33  
34  
35  
36  
37  
38  
39  
40  
41  
42  
43  
44  
45  
46  
47  
48  
49

|  |  |  |                    |  |  |  |  |
|--|--|--|--------------------|--|--|--|--|
|  |  |  | Melbourn<br>e, VIC |  |  |  |  |
|--|--|--|--------------------|--|--|--|--|

470 \*Illustrative examples extracted verbatim from Medicines Australia transparency reports

471  
472

For peer review only

473 Table 2. Professional status of attendees and clinical areas of focus for the events (n =  
474 116,845).

| Characteristic                           | Number of events | Percent |
|------------------------------------------|------------------|---------|
| <b>Professional status of attendees*</b> |                  |         |
| Medical specialists                      | 80,060           | 68.5    |
| Nurses                                   | 46,214           | 39.6    |
| Trainees                                 | 44,774           | 38.3    |
| Primary care doctors                     | 24,662           | 21.1    |
| Pharmacists                              | 9,781            | 8.4     |
| <b>Clinical areas of focus</b>           |                  |         |
| Oncology                                 | 22,987           | 19.7    |
| Surgery                                  | 13,306           | 11.4    |
| Endocrinology                            | 12,655           | 10.8    |
| Cardiology                               | 9,033            | 7.7     |
| Haematology                              | 8,200            | 7.0     |
| Respiratory Medicine                     | 7,659            | 6.6     |
| Psychiatry                               | 6,252            | 5.4     |
| Nephrology                               | 6,199            | 5.3     |
| Gastroenterology                         | 5,643            | 4.8     |
| Pathology                                | 5,361            | 4.6     |
| Neurology                                | 4,259            | 3.6     |
| Urology                                  | 4,259            | 3.6     |

|                        |       |      |
|------------------------|-------|------|
| Radiology              | 3,667 | 3.1  |
| Infectious Diseases    | 3,348 | 2.9  |
| Geriatrics             | 3,134 | 2.7  |
| Anaesthesiology        | 2,746 | 2.4  |
| Rheumatology           | 2,671 | 2.3  |
| Paediatrics            | 1,994 | 1.7  |
| Allergy/Immunology     | 1,398 | 1.2  |
| Ophthalmology          | 1,365 | 1.2  |
| Palliative Care        | 1,319 | 1.1  |
| Intensive Care         | 1,147 | 1.0  |
| Sexual Health          | 955   | 0.8  |
| Dermatology            | 913   | 0.8  |
| Obstetrics/Gynaecology | 878   | 0.8  |
| Emergency              | 875   | 0.7  |
| Internal Medicine      | 418   | 0.4  |
| Neonatology            | 363   | 0.3  |
| Nuclear Medicine       | 357   | 0.3  |
| Pharmacology           | 219   | 0.2  |
| Otolaryngology         | 31    | 0.03 |
| Andrology              | 18    | 0.02 |

475 \*percentages do not add to 100 because multiple types of professionals could attend an event.

476

477

478 Table 3. Characteristics of events and median cost per person

|                                                 | <b>Number of events<br/>n=116,845<br/>n (%)</b> | <b>Median total cost per<br/>person*(Interquartile Range)<br/>\$ AU</b> |
|-------------------------------------------------|-------------------------------------------------|-------------------------------------------------------------------------|
| <b>Location</b>                                 |                                                 |                                                                         |
| Overseas                                        | 2,262 (1.9%)                                    | \$ 710 (91-7,300)                                                       |
| Within Australia                                | 114,583 (98.1%)                                 | \$ 14 (10-62)                                                           |
| <b>Setting</b>                                  |                                                 |                                                                         |
| Clinical setting                                | 74,998 (64.2%)                                  | \$ 12 (9-15)                                                            |
| Non-clinical setting                            | 41,847 (35.8%)                                  | \$ 91 (28-154)                                                          |
| <b>Event type</b>                               |                                                 |                                                                         |
| Scientific meeting (e.g. congress, conferences) | 4,920 (4.2%)                                    | \$ 93 (33-659)                                                          |
| Other types of events                           | 111,925 (95.8%)                                 | \$ 14 (10-60)                                                           |

479 \*Includes hospitality as well as other costs (e.g. venue hire, speaker honoraria, audiovisual  
480 hire)

481

482



483 Table 4. The top twenty companies in terms of number of sponsored events.

| Company                        | Number of events | Number of attendees | Total cost of food and beverage (AU\$) | Total cost of function* (AU\$) | Median total cost per event (IQR) (AU\$) |
|--------------------------------|------------------|---------------------|----------------------------------------|--------------------------------|------------------------------------------|
| <b>AstraZeneca</b>             | 13,968           | 435,686             | 12,725,027                             | 31,766,776                     | 318 (165-2,261)                          |
| <b>Novartis</b>                | 10,120           | 244,069             | 6,600,503                              | 27,467,246                     | 270 (167-1,154)                          |
| <b>Merck Sharp &amp; Dohme</b> | 9,142            | 214,621             | 5,388,247                              | 18,352,116                     | 341 (180-1,182)                          |
| <b>Roche</b>                   | 7,383            | 174,878             | 2,891,426                              | 16,625,126                     | 186 (129-284)                            |
| <b>Pfizer</b>                  | 7,125            | 188,439             | 3,740,677                              | 18,464,785                     | 236 (141-573)                            |
| <b>Sanofi</b>                  | 6,764            | 261,089             | 3,243,420                              | 13,668,127                     | 240 (149-600)                            |
| <b>Amgen</b>                   | 5,562            | 117,767             | 4,545,874                              | 11,145,245                     | 192 (117-332)                            |
| <b>Eli Lilly</b>               | 5,419            | 138,765             | 2,270,896                              | 7,949,786                      | 145 (62-455)                             |
| <b>Servier Lab</b>             | 4,245            | 145,111             | 4,347,268                              | 14,002,283                     | 482 (196-2,252)                          |
| <b>Mundipharma</b>             | 4,168            | 135,517             | 2,956,613                              | 8,939,046                      | 342 (182-2,394)                          |
| <b>Janssen</b>                 | 3,901            | 140,549             | 3,168,024                              | 14,643,568                     | 320 (164-1,818)                          |
| <b>GlaxoSmithKline</b>         | 3,706            | 103,331             | 2,993,037                              | 6,292,242                      | 254 (161-1,645)                          |
| <b>CSL</b>                     | 3,285            | 138,170             | 1,337,909                              | 6,000,501                      | 288 (179-1,427)                          |
| <b>Bristol Myers Squibb</b>    | 3,151            | 138,446             | 2,492,290                              | 12,755,630                     | 245 (82-1,900)                           |
| <b>Bayer</b>                   | 2,964            | 151,084             | 1,417,055                              | 8,146,292                      | 396 (194-1,500)                          |
| <b>IPSEN</b>                   | 2,802            | 85,475              | 984,477                                | 5,163,600                      | 254 (169-454)                            |
| <b>Abbott/AbbVie</b>           | 2,774            | 59,793              | 3,291,305                              | 6,437,623                      | 255 (157-1,037)                          |
| <b>Boehringer Ingelheim</b>    | 2,223            | 56,204              | 6,050,143                              | 8,724,933                      | 2,007 (1,308-2,654)                      |
| <b>Gilead Sciences</b>         | 2,049            | 45,510              | 990,419                                | 7,061,338                      | 245 (160-540)                            |
| <b>Merk Serono</b>             | 1,841            | 41,809              | 1,376,023                              | 4,237,372                      | 229 (145-626)                            |

|                       |         |           |            |             |                 |
|-----------------------|---------|-----------|------------|-------------|-----------------|
| <b>Total – Top 20</b> | 102,592 | 3,016,313 | 72,810,634 | 247,843,635 | 262 (152-1,199) |
| <b>All companies</b>  | 116,845 | 3,481,750 | 84,862,792 | 286,117,928 | 263 (153-1,195) |

484 Abbreviations: IQR, interquartile range

485 \* Includes food and drink as well as other costs (e.g. venue hire, speaker honoraria,  
486 audiovisual hire)

487

488

489

For peer review only

## Supplementary File 1. Keywords for coding

| Variable name | Keyword search                                                                                                                                                                                                                                                                                                                                                                                                                                                                                                                                                                                                                                                                                                                                                                                                                                                                                                                                                                                                                  |
|---------------|---------------------------------------------------------------------------------------------------------------------------------------------------------------------------------------------------------------------------------------------------------------------------------------------------------------------------------------------------------------------------------------------------------------------------------------------------------------------------------------------------------------------------------------------------------------------------------------------------------------------------------------------------------------------------------------------------------------------------------------------------------------------------------------------------------------------------------------------------------------------------------------------------------------------------------------------------------------------------------------------------------------------------------|
| COMPANY       | A. Menarini Australia Pty Ltd; Abbott Australasia Pty Ltd OR AbbVie Pty Ltd; Actelion Pharmaceuticals Australia Pty Ltd; Alexion Pharmaceuticals Australasia PTY LTD; Allergan Australia Pty Ltd; Amgen Australia; Astellas Pharma Australia Pty Ltd; Astrazeneca Pty Ltd; Baxter Healthcare Pty Ltd; Bayer Australia Ltd; Besins Healthcare Australia; BioCeuticals; Biogen Idec Australia Pty Limited; Boehringer Ingelheim Pty Limited; Bristol-Myers Squibb Australia Pty Limited; Celgene Pty Ltd; CSL (includes also bioCSL Australia Pty Ltd and CSL Behring); Eisai Australia Pty Ltd; Eli Lilly Australia Pty Ltd; Fresenius Kabi Australia; Gilead Sciences Pty.; GlaxoSmithKline Australia Pty Ltd; iNova Pharmaceuticals (Aus) Pty Ltd; IPSEN Pty Ltd; Janssen; LEO Pharma Pty Ltd; Lundbeck Australia; Merck Serono Australia Pty Ltd; MSD Australia Pty Ltd; Mundipharma Pty Ltd; Mylan EPD; Norgine Pty Limited; Novartis Pharmaceuticals Australia Pty Limited (includes also Alcon Laboratories); Novo Nordisk |

|                                                                                                             |                                                                                                                                                                                                                                                                                      |
|-------------------------------------------------------------------------------------------------------------|--------------------------------------------------------------------------------------------------------------------------------------------------------------------------------------------------------------------------------------------------------------------------------------|
|                                                                                                             | Pharmaceuticals; Pfizer Australia; Roche Products Pty Limited; Sanofi/Sanofi Aventis Australia Pty Ltd; Servier Laboratories (Australia) Pty Ltd; Shire Australia; Takeda Pharmaceuticals Australia Pty Ltd (includes also Nycomed Pty Ltd Report); UCB Pharma; Vifor Pharma Pty Ltd |
|                                                                                                             |                                                                                                                                                                                                                                                                                      |
| LOCATION                                                                                                    |                                                                                                                                                                                                                                                                                      |
| New South Wales                                                                                             | NSW, New South Wales, Sydney, other cities or suburbs, and postal codes of NSW*                                                                                                                                                                                                      |
| Victoria                                                                                                    | VIC, Victoria, Melbourne, other cities or suburbs and postal codes of VIC*                                                                                                                                                                                                           |
| Australian Capital Territory                                                                                | ACT, Australian Capital Territory, Canberra, other cities or suburbs, and postal codes of ACT*                                                                                                                                                                                       |
| Western Australia                                                                                           | WA, Western Australia, Perth, other cities or suburbs, and postal codes of WA*                                                                                                                                                                                                       |
| South Australia                                                                                             | SA, South Australia, Adelaide, other cities or suburbs, and postal codes of SA*                                                                                                                                                                                                      |
| North Territory                                                                                             | NT, North Territory, other cities or suburbs, and postal codes of NT*                                                                                                                                                                                                                |
| Tasmania                                                                                                    | TAS, Tasmania, Hobart, other cities or suburbs, and postal codes of Tasmania*                                                                                                                                                                                                        |
| Overseas                                                                                                    | Overseas: outside of Australia**                                                                                                                                                                                                                                                     |
| *Where the state or capital was not listed, events were hand coded based on postal codes, cities or suburbs |                                                                                                                                                                                                                                                                                      |
| **Events not taking place in an Australian state were hand-coded                                            |                                                                                                                                                                                                                                                                                      |

|                                                                                                                                                                                                                                                                                                                                                                                                                                                                                                                                                 |                                                                                                                                                                                                                 |
|-------------------------------------------------------------------------------------------------------------------------------------------------------------------------------------------------------------------------------------------------------------------------------------------------------------------------------------------------------------------------------------------------------------------------------------------------------------------------------------------------------------------------------------------------|-----------------------------------------------------------------------------------------------------------------------------------------------------------------------------------------------------------------|
| MEALS                                                                                                                                                                                                                                                                                                                                                                                                                                                                                                                                           |                                                                                                                                                                                                                 |
| <ul style="list-style-type: none"> <li>Lunch</li> </ul>                                                                                                                                                                                                                                                                                                                                                                                                                                                                                         | Lunch                                                                                                                                                                                                           |
| <ul style="list-style-type: none"> <li>Dinner</li> </ul>                                                                                                                                                                                                                                                                                                                                                                                                                                                                                        | Dinner                                                                                                                                                                                                          |
| <ul style="list-style-type: none"> <li>Breakfast</li> </ul>                                                                                                                                                                                                                                                                                                                                                                                                                                                                                     | Breakfast                                                                                                                                                                                                       |
| <ul style="list-style-type: none"> <li>Tea</li> </ul>                                                                                                                                                                                                                                                                                                                                                                                                                                                                                           | Afternoon tea, morning tea, light refreshments, light meals, sandwiches & drinks, coffee cart, snack and beverage, sushi                                                                                        |
| <ul style="list-style-type: none"> <li>All day events with meals</li> </ul>                                                                                                                                                                                                                                                                                                                                                                                                                                                                     | Day delegate package*; conference package**                                                                                                                                                                     |
| <ul style="list-style-type: none"> <li>Food unspecified</li> </ul>                                                                                                                                                                                                                                                                                                                                                                                                                                                                              | food & beverages, meals, drinks, in hospital catering, beverages, wine                                                                                                                                          |
| <ul style="list-style-type: none"> <li>No meals provided</li> </ul>                                                                                                                                                                                                                                                                                                                                                                                                                                                                             | Sponsorship/accommodation only, no hospitality provided, travel/accommodation only (domestic events)                                                                                                            |
| <p>*Note: “day delegate package” consisted of entries where multiple meals were listed ((Lunch, tea), (Breakfast, tea), (Dinner, tea), (Breakfast, lunch, tea))</p> <p>**Note: “conference package” consisted of events lasting multiple days and typically included a day delegate package, often accommodation (food and beverage not reported separately), registration (food and beverage not reported separately), or travel (including flights, registration, airfares, accommodation and food and beverages not reported separately)</p> |                                                                                                                                                                                                                 |
| EVENTS HELD IN CLINICAL SETTING                                                                                                                                                                                                                                                                                                                                                                                                                                                                                                                 | Hospital; clinic; practice; medicare local; health centre; surgery; medical centre; medical; health care centre; specialist centre; cancer centre; cancer care centre; heart centre; medical and dental centre; |

|                                                                        |                                                                                                                                                                                                                                                                                                                                                                                                                                                                                                                                                                              |
|------------------------------------------------------------------------|------------------------------------------------------------------------------------------------------------------------------------------------------------------------------------------------------------------------------------------------------------------------------------------------------------------------------------------------------------------------------------------------------------------------------------------------------------------------------------------------------------------------------------------------------------------------------|
|                                                                        | endocrine centre; radiotherapy centre; radiation centre; optical centre; eye centre; renal unit; ward; department; dept; community health; family planning; education centre.                                                                                                                                                                                                                                                                                                                                                                                                |
|                                                                        |                                                                                                                                                                                                                                                                                                                                                                                                                                                                                                                                                                              |
| <b>PROFESSIONAL STATUS</b>                                             |                                                                                                                                                                                                                                                                                                                                                                                                                                                                                                                                                                              |
| <ul style="list-style-type: none"> <li>Primary care doctors</li> </ul> | GP; general practitioner; family medicine.                                                                                                                                                                                                                                                                                                                                                                                                                                                                                                                                   |
| <ul style="list-style-type: none"> <li>Nurses</li> </ul>               | Nurse                                                                                                                                                                                                                                                                                                                                                                                                                                                                                                                                                                        |
| <ul style="list-style-type: none"> <li>Pharmacists</li> </ul>          | Pharmacist                                                                                                                                                                                                                                                                                                                                                                                                                                                                                                                                                                   |
| <ul style="list-style-type: none"> <li>Trainees</li> </ul>             | Registrar; resident; intern; student; advanced trainee; RMO; resident medical officer; JHO; SHO; senior house officer; PHO; principal house officer; fellow                                                                                                                                                                                                                                                                                                                                                                                                                  |
| <ul style="list-style-type: none"> <li>Specialty care</li> </ul>       | Specialist; consultant; senior medical officer; SMO; visiting medical officer; VMO; general medicine; general physician; *ology physician; *ology doctor;<br><br>allergist; allergy physician; anesthesiologist; anesthetist; anaesthesiologist; anaesthetist; andrologist; cardiologist; dermatologist, diabetologist; emergency physician; emergency medicine physician; endocrinologist; epileptologist; gastroenterologist; geriatrician; getriatric physician; gynaecologist; obstetrician; OB/GYN; haematologist; hematologist; hepatologist; immunologist; infectious |

1  
2  
3  
4  
5  
6  
7  
8  
9  
10  
11  
12  
13  
14  
15  
16  
17  
18  
19  
20  
21  
22  
23  
24  
25  
26  
27  
28  
29  
30  
31  
32  
33  
34  
35  
36  
37  
38  
39  
40  
41  
42  
43  
44  
45  
46  
47  
48  
49  
50  
51  
52  
53  
54  
55  
56  
57  
58  
59  
60

|                                                                      |                                                                                                                                                                                                                                                                                                                                                                                                                                                                                                                                                                                                                                                          |
|----------------------------------------------------------------------|----------------------------------------------------------------------------------------------------------------------------------------------------------------------------------------------------------------------------------------------------------------------------------------------------------------------------------------------------------------------------------------------------------------------------------------------------------------------------------------------------------------------------------------------------------------------------------------------------------------------------------------------------------|
|                                                                      | disease physician; infectious disease doctor; internal medicine physician; microbiologist; neonatologist; neurologist; nuclear medicine physician; nephrologist; renal physician; renal doctor; urologist; oncologist; pharmacologist; pulmonologist; psychogeriatrician; ophthalmologist; rheumatologist; radiologist; respiratory physician; respiratory medicine physician; respiratory medicine doctor; palliative care physician; pathologist; sexual health physician; sexual health doctor; psychiatrist; psychiatry doctor; paediatrician; surgeon; surgery doctor; intensive care doctor; intensivist; intensive care physician; cardiothoracic |
|                                                                      |                                                                                                                                                                                                                                                                                                                                                                                                                                                                                                                                                                                                                                                          |
| <b>CLINICAL FOCUS</b>                                                |                                                                                                                                                                                                                                                                                                                                                                                                                                                                                                                                                                                                                                                          |
| <ul style="list-style-type: none"> <li>Allergy/Immunology</li> </ul> | Allergist; allergy; immunologist; immunology                                                                                                                                                                                                                                                                                                                                                                                                                                                                                                                                                                                                             |
| <ul style="list-style-type: none"> <li>Anaesthesiology</li> </ul>    | Anesthesiologist; anaesthetist; anaesthesiologist; anaesthetist; anaesthesiology                                                                                                                                                                                                                                                                                                                                                                                                                                                                                                                                                                         |
| <ul style="list-style-type: none"> <li>Andrology</li> </ul>          | Andrologist                                                                                                                                                                                                                                                                                                                                                                                                                                                                                                                                                                                                                                              |
| <ul style="list-style-type: none"> <li>Cardiology</li> </ul>         | Cardiologist; cardiology                                                                                                                                                                                                                                                                                                                                                                                                                                                                                                                                                                                                                                 |
| <ul style="list-style-type: none"> <li>Dermatology</li> </ul>        | Dermatologist; dermatology                                                                                                                                                                                                                                                                                                                                                                                                                                                                                                                                                                                                                               |
| <ul style="list-style-type: none"> <li>Emergency</li> </ul>          | Emergency                                                                                                                                                                                                                                                                                                                                                                                                                                                                                                                                                                                                                                                |
| <ul style="list-style-type: none"> <li>Endocrinology</li> </ul>      | endocrinologist; endocrinology; diabetologist; diabetology; diabetes                                                                                                                                                                                                                                                                                                                                                                                                                                                                                                                                                                                     |
| <ul style="list-style-type: none"> <li>Gastroenterology</li> </ul>   | Gastroenterologist; gastroenterology; Hepatologist; hepatology                                                                                                                                                                                                                                                                                                                                                                                                                                                                                                                                                                                           |

|                                                                                        |                                                                 |
|----------------------------------------------------------------------------------------|-----------------------------------------------------------------|
| • Geriatrics                                                                           | Geriatrician; geriatric;<br>psychogeriatrician; elderly         |
| • Haematology                                                                          | Haematologist; haematology;<br>hematology; hematologist         |
| • Infectious Diseases                                                                  | Infectious disease; microbiologist;<br>microbiology             |
| • Internal Medicine                                                                    | Internal medicine                                               |
| • Intensive care                                                                       | Intensive care; intensivist; critical care                      |
| • Neonatology                                                                          | Neonatologist; neonatology; NICU;<br>neonatal                   |
| • Nuclear medicine                                                                     | Nuclear medicine                                                |
| • Nephrology                                                                           | Nephrologist, nephrology; renal; kidney                         |
| • Neurology                                                                            | Neurologist; neurology; epileptologist                          |
| • Obstetrics/Gynaecology                                                               | Gynaecologist; gynaecology;<br>obstetrician; OB/GYN; obstetrics |
| • Oncology                                                                             | Oncologist; oncology; cancer                                    |
| • Ophthalmology                                                                        | Ophthalmologist; ophthalmology                                  |
| • Otolaryngology                                                                       | Otolaryngology                                                  |
| • Palliative care                                                                      | Palliative care                                                 |
| • Pathology                                                                            | Pathologist; pathology                                          |
| • Pharmacology                                                                         | Pharmacologist; pharmacology                                    |
| • Paediatrics                                                                          | Paediatrician; paediatric*; pediatric*                          |
| • Psychiatry                                                                           | Psychiatrist; psychiatry; mental health                         |
| • Radiology                                                                            | Radiologist; radiology                                          |
| • Rheumatology                                                                         | Rheumatologist; rheumatology                                    |
| • Respiratory medicine                                                                 | Lung specialist; respiratory;<br>pulmonologist                  |
| • Sexual health                                                                        | Sexual health                                                   |
| • Surgery                                                                              | Surgeon; surgery; surgical; operating<br>theatre                |
| • Urology                                                                              | Urologist; urology                                              |
| *Note: the clinical focus is a proxy variable based on clinical specialty of attendees |                                                                 |



| and/or event description.     |                                                                                                                                            |
|-------------------------------|--------------------------------------------------------------------------------------------------------------------------------------------|
| EVENT TYPE                    |                                                                                                                                            |
| • Meeting (all inclusive/NOS) | Search for generic word “meeting”                                                                                                          |
| • Journal club                | Journal club; journalclub                                                                                                                  |
| • Inservice                   | Inservice                                                                                                                                  |
| • Workshop                    | Workshop                                                                                                                                   |
| • Grand rounds                | Grand round; grandround                                                                                                                    |
| • Scientific meeting          | scientific meeting; congress; conference<br>AND NOT<br>videoconference/teleconference                                                      |
| • Clinical meeting            | internal meeting; departmental meeting;<br>clinical meeting; case review, case<br>conference; case study meeting; case<br>study conference |
| • Multidisciplinary meeting   | Multidisciplinary meeting                                                                                                                  |

STROBE—Checklist of items that should be included in reports of *cross-sectional studies*

| Section/Topic             | Item # | Recommendation                                                                                                                                                                       | Reported on page #                                        |
|---------------------------|--------|--------------------------------------------------------------------------------------------------------------------------------------------------------------------------------------|-----------------------------------------------------------|
| Title and abstract        | 1      | (a) Indicate the study’s design with a commonly used term in the title or the abstract                                                                                               | Page 1, 2                                                 |
|                           |        | (b) Provide in the abstract an informative and balanced summary of what was done and what was found                                                                                  | Page 2                                                    |
| <b>Introduction</b>       |        |                                                                                                                                                                                      |                                                           |
| Background/rationale      | 2      | Explain the scientific background and rationale for the investigation being reported                                                                                                 | Page 4, 5                                                 |
| Objectives                | 3      | State specific objectives, including any prespecified hypotheses                                                                                                                     | Page 5                                                    |
| <b>Methods</b>            |        |                                                                                                                                                                                      |                                                           |
| Study design              | 4      | Present key elements of study design early in the paper                                                                                                                              | Page 5                                                    |
| Setting                   | 5      | Describe the setting, locations, and relevant dates, including periods of recruitment, exposure, follow-up, and data collection                                                      | Page 5                                                    |
| Participants              | 6      | (a) Give the eligibility criteria, and the sources and methods of selection of participants                                                                                          | Page 5                                                    |
| Variables                 | 7      | Clearly define all outcomes, exposures, predictors, potential confounders, and effect modifiers. Give diagnostic criteria, if applicable                                             | Page 5,6                                                  |
| Data sources/ measurement | 8*     | For each variable of interest, give sources of data and details of methods of assessment (measurement). Describe comparability of assessment methods if there is more than one group | Page 6                                                    |
| Bias                      | 9      | Describe any efforts to address potential sources of bias                                                                                                                            | Methods: page 5, 6 (cleaning of data and filter function) |
| Study size                | 10     | Explain how the study size was arrived at                                                                                                                                            | Page 5 (all available reports)                            |
| Quantitative variables    | 11     | Explain how quantitative variables were handled in the analyses. If applicable, describe which groupings were chosen and why                                                         | Page 6                                                    |
| Statistical methods       | 12     | (a) Describe all statistical methods, including those used to control for confounding                                                                                                | Page 6                                                    |
|                           |        | (b) Describe any methods used to examine subgroups and interactions                                                                                                                  | N/A                                                       |

1  
2  
3  
4  
5  
6  
7  
8  
9  
10  
11  
12  
13  
14  
15  
16  
17  
18  
19  
20  
21  
22  
23  
24  
25  
26  
27  
28  
29  
30  
31  
32  
33  
34  
35  
36  
37  
38  
39  
40  
41  
42  
43  
44  
45  
46  
47  
48  
49

|                          |     |                                                                                                                                                                                                              |            |
|--------------------------|-----|--------------------------------------------------------------------------------------------------------------------------------------------------------------------------------------------------------------|------------|
|                          |     | (c) Explain how missing data were addressed                                                                                                                                                                  | N/A        |
|                          |     | (d) If applicable, describe analytical methods taking account of sampling strategy                                                                                                                           | N/A        |
|                          |     | (e) Describe any sensitivity analyses                                                                                                                                                                        | N/A        |
| <b>Results</b>           |     |                                                                                                                                                                                                              |            |
| Participants             | 13* | (a) Report numbers of individuals at each stage of study—eg numbers potentially eligible, examined for eligibility, confirmed eligible, included in the study, completing follow-up, and analysed            | Page 7     |
|                          |     | (b) Give reasons for non-participation at each stage                                                                                                                                                         | N/A        |
|                          |     | (c) Consider use of a flow diagram                                                                                                                                                                           | N/A        |
| Descriptive data         | 14* | (a) Give characteristics of study participants (eg demographic, clinical, social) and information on exposures and potential confounders                                                                     | Page 7     |
|                          |     | (b) Indicate number of participants with missing data for each variable of interest                                                                                                                          | N/A        |
| Outcome data             | 15* | Report numbers of outcome events or summary measures                                                                                                                                                         | 7-9        |
| Main results             | 16  | (a) Give unadjusted estimates and, if applicable, confounder-adjusted estimates and their precision (eg, 95% confidence interval). Make clear which confounders were adjusted for and why they were included | N/A        |
|                          |     | (b) Report category boundaries when continuous variables were categorized                                                                                                                                    | N/A        |
|                          |     | (c) If relevant, consider translating estimates of relative risk into absolute risk for a meaningful time period                                                                                             | N/A        |
| Other analyses           | 17  | Report other analyses done—eg analyses of subgroups and interactions, and sensitivity analyses                                                                                                               | N/A        |
| <b>Discussion</b>        |     |                                                                                                                                                                                                              |            |
| Key results              | 18  | Summarise key results with reference to study objectives                                                                                                                                                     | Page 10    |
| Limitations              | 19  | Discuss limitations of the study, taking into account sources of potential bias or imprecision. Discuss both direction and magnitude of any potential bias                                                   | Page 11    |
| Interpretation           | 20  | Give a cautious overall interpretation of results considering objectives, limitations, multiplicity of analyses, results from similar studies, and other relevant evidence                                   | Page 10-12 |
| Generalisability         | 21  | Discuss the generalisability (external validity) of the study results                                                                                                                                        | Page 10-12 |
| <b>Other information</b> |     |                                                                                                                                                                                                              |            |
| Funding                  | 22  | Give the source of funding and the role of the funders for the present study and, if applicable, for the original study on which the present article is based                                                | Page 15    |

\*Give information separately for cases and controls in case-control studies and, if applicable, for exposed and unexposed groups in cohort and cross-sectional studies.

1  
2  
3  
4  
5  
6  
7  
8  
9  
10  
11  
12  
13  
14  
15  
16  
17  
18  
19  
20  
21  
22  
23  
24  
25  
26  
27  
28  
29  
30  
31  
32  
33  
34  
35  
36  
37  
38  
39  
40  
41  
42  
43  
44  
45  
46  
47  
48  
49

**Note:** An Explanation and Elaboration article discusses each checklist item and gives methodological background and published examples of transparent reporting. The STROBE checklist is best used in conjunction with this article (freely available on the Web sites of PLoS Medicine at <http://www.plosmedicine.org/>, Annals of Internal Medicine at <http://www.annals.org/>, and Epidemiology at <http://www.epidem.com/>). Information on the STROBE Initiative is available at [www.strobe-statement.org](http://www.strobe-statement.org).

For peer review only
