# Supplementary material for: A cross-sectional analysis of pharmaceutical industry-funded events for health professionals in Australia
Source: PubMed Central journal article supplement — BMJ Open. 2017 Jun 30;7(6):e016701. doi: 10.1136/bmjopen-2017-016701 (PMC5726125; doi:10.1136/bmjopen-2017-016701), 2017-06-30
Supplement: bmjopen-2017-016701supp001.pdf [file bmjopen-2017-016701supp001.pdf]

## Supplementary File 1. Keywords for coding

| Variable name | Keyword search                                                                                                                                                                                                                                                                                                                                                                                                                                                                                                                                                                                                                                                                                                                                                                                                                                                                                                                                                                                                                         |
|---------------|----------------------------------------------------------------------------------------------------------------------------------------------------------------------------------------------------------------------------------------------------------------------------------------------------------------------------------------------------------------------------------------------------------------------------------------------------------------------------------------------------------------------------------------------------------------------------------------------------------------------------------------------------------------------------------------------------------------------------------------------------------------------------------------------------------------------------------------------------------------------------------------------------------------------------------------------------------------------------------------------------------------------------------------|
| COMPANY       | <p>A. Menarini Australia Pty Ltd; Abbott Australasia Pty Ltd OR AbbVie Pty Ltd; Actelion Pharmaceuticals Australia Pty Ltd; Alexion Pharmaceuticals Australasia PTY LTD; Allergan Australia Pty Ltd; Amgen Australia; Astellas Pharma Australia Pty Ltd; Astrazeneca Pty Ltd; Baxter Healthcare Pty Ltd; Bayer Australia Ltd; Besins Healthcare Australia; BioCeuticals; Biogen Idec Australia Pty Limited; Boehringer Ingelheim Pty Limited; Bristol-Myers Squibb Australia Pty Limited; Celgene Pty Ltd; CSL (includes also bioCSL Australia Pty Ltd and CSL Behring); Eisai Australia Pty Ltd; Eli Lilly Australia Pty Ltd; Fresenius Kabi Australia; Gilead Sciences Pty.; GlaxoSmithKline Australia Pty Ltd; iNova Pharmaceuticals (Aus) Pty Ltd; IPSEN Pty Ltd; Janssen; LEO Pharma Pty Ltd; Lundbeck Australia; Merck Serono Australia Pty Ltd; MSD Australia Pty Ltd; Mundipharma Pty Ltd; Mylan EPD; Norgine Pty Limited; Novartis Pharmaceuticals Australia Pty Limited (includes also Alcon Laboratories); Novo Nordisk</p> |

|                                                                                                                                                                                            |                                                                                                                                                                                                                                                                                      |
|--------------------------------------------------------------------------------------------------------------------------------------------------------------------------------------------|--------------------------------------------------------------------------------------------------------------------------------------------------------------------------------------------------------------------------------------------------------------------------------------|
|                                                                                                                                                                                            | Pharmaceuticals; Pfizer Australia; Roche Products Pty Limited; Sanofi/Sanofi Aventis Australia Pty Ltd; Servier Laboratories (Australia) Pty Ltd; Shire Australia; Takeda Pharmaceuticals Australia Pty Ltd (includes also Nycomed Pty Ltd Report); UCB Pharma; Vifor Pharma Pty Ltd |
|                                                                                                                                                                                            |                                                                                                                                                                                                                                                                                      |
| LOCATION                                                                                                                                                                                   |                                                                                                                                                                                                                                                                                      |
| New South Wales                                                                                                                                                                            | NSW, New South Wales, Sydney, other cities or suburbs, and postal codes of NSW*                                                                                                                                                                                                      |
| Victoria                                                                                                                                                                                   | VIC, Victoria, Melbourne, other cities or suburbs and postal codes of VIC*                                                                                                                                                                                                           |
| Australian Capital Territory                                                                                                                                                               | ACT, Australian Capital Territory, Canberra, other cities or suburbs, and postal codes of ACT*                                                                                                                                                                                       |
| Western Australia                                                                                                                                                                          | WA, Western Australia, Perth, other cities or suburbs, and postal codes of WA*                                                                                                                                                                                                       |
| South Australia                                                                                                                                                                            | SA, South Australia, Adelaide, other cities or suburbs, and postal codes of SA*                                                                                                                                                                                                      |
| North Territory                                                                                                                                                                            | NT, North Territory, other cities or suburbs, and postal codes of NT*                                                                                                                                                                                                                |
| Tasmania                                                                                                                                                                                   | TAS, Tasmania, Hobart, other cities or suburbs, and postal codes of Tasmania*                                                                                                                                                                                                        |
| Overseas                                                                                                                                                                                   | Overseas: outside of Australia**                                                                                                                                                                                                                                                     |
| <p>*Where the state or capital was not listed, events were hand coded based on postal codes, cities or suburbs</p> <p>**Events not taking place in an Australian state were hand-coded</p> |                                                                                                                                                                                                                                                                                      |

|                                                                                                                                                                                                                                                                                                                                                                                                                                                                                                                                                 |                                                                                                                                                                                                                 |
|-------------------------------------------------------------------------------------------------------------------------------------------------------------------------------------------------------------------------------------------------------------------------------------------------------------------------------------------------------------------------------------------------------------------------------------------------------------------------------------------------------------------------------------------------|-----------------------------------------------------------------------------------------------------------------------------------------------------------------------------------------------------------------|
| MEALS                                                                                                                                                                                                                                                                                                                                                                                                                                                                                                                                           |                                                                                                                                                                                                                 |
| <ul style="list-style-type: none"> <li>Lunch</li> </ul>                                                                                                                                                                                                                                                                                                                                                                                                                                                                                         | Lunch                                                                                                                                                                                                           |
| <ul style="list-style-type: none"> <li>Dinner</li> </ul>                                                                                                                                                                                                                                                                                                                                                                                                                                                                                        | Dinner                                                                                                                                                                                                          |
| <ul style="list-style-type: none"> <li>Breakfast</li> </ul>                                                                                                                                                                                                                                                                                                                                                                                                                                                                                     | Breakfast                                                                                                                                                                                                       |
| <ul style="list-style-type: none"> <li>Tea</li> </ul>                                                                                                                                                                                                                                                                                                                                                                                                                                                                                           | Afternoon tea, morning tea, light refreshments, light meals, sandwiches & drinks, coffee cart, snack and beverage, sushi                                                                                        |
| <ul style="list-style-type: none"> <li>All day events with meals</li> </ul>                                                                                                                                                                                                                                                                                                                                                                                                                                                                     | Day delegate package*; conference package**                                                                                                                                                                     |
| <ul style="list-style-type: none"> <li>Food unspecified</li> </ul>                                                                                                                                                                                                                                                                                                                                                                                                                                                                              | food & beverages, meals, drinks, in hospital catering, beverages, wine                                                                                                                                          |
| <ul style="list-style-type: none"> <li>No meals provided</li> </ul>                                                                                                                                                                                                                                                                                                                                                                                                                                                                             | Sponsorship/accommodation only, no hospitality provided, travel/accommodation only (domestic events)                                                                                                            |
| <p>*Note: “day delegate package” consisted of entries where multiple meals were listed ((Lunch, tea), (Breakfast, tea), (Dinner, tea), (Breakfast, lunch, tea))</p> <p>**Note: “conference package” consisted of events lasting multiple days and typically included a day delegate package, often accommodation (food and beverage not reported separately), registration (food and beverage not reported separately), or travel (including flights, registration, airfares, accommodation and food and beverages not reported separately)</p> |                                                                                                                                                                                                                 |
| EVENTS HELD IN CLINICAL SETTING                                                                                                                                                                                                                                                                                                                                                                                                                                                                                                                 | Hospital; clinic; practice; medicare local; health centre; surgery; medical centre; medical; health care centre; specialist centre; cancer centre; cancer care centre; heart centre; medical and dental centre; |

|                                                                          |                                                                                                                                                                                                                                                                                                                                                                                                                                                                                                                                                                                     |
|--------------------------------------------------------------------------|-------------------------------------------------------------------------------------------------------------------------------------------------------------------------------------------------------------------------------------------------------------------------------------------------------------------------------------------------------------------------------------------------------------------------------------------------------------------------------------------------------------------------------------------------------------------------------------|
|                                                                          | endocrine centre; radiotherapy centre; radiation centre; optical centre; eye centre; renal unit; ward; department; dept; community health; family planning; education centre.                                                                                                                                                                                                                                                                                                                                                                                                       |
|                                                                          |                                                                                                                                                                                                                                                                                                                                                                                                                                                                                                                                                                                     |
| <b>PROFESSIONAL STATUS</b>                                               |                                                                                                                                                                                                                                                                                                                                                                                                                                                                                                                                                                                     |
| <ul style="list-style-type: none"> <li>• Primary care doctors</li> </ul> | GP; general practitioner; family medicine.                                                                                                                                                                                                                                                                                                                                                                                                                                                                                                                                          |
| <ul style="list-style-type: none"> <li>• Nurses</li> </ul>               | Nurse                                                                                                                                                                                                                                                                                                                                                                                                                                                                                                                                                                               |
| <ul style="list-style-type: none"> <li>• Pharmacists</li> </ul>          | Pharmacist                                                                                                                                                                                                                                                                                                                                                                                                                                                                                                                                                                          |
| <ul style="list-style-type: none"> <li>• Trainees</li> </ul>             | Registrar; resident; intern; student; advanced trainee; RMO; resident medical officer; JHO; SHO; senior house officer; PHO; principal house officer; fellow                                                                                                                                                                                                                                                                                                                                                                                                                         |
| <ul style="list-style-type: none"> <li>• Specialty care</li> </ul>       | <p>Specialist; consultant; senior medical officer; SMO; visiting medical officer; VMO; general medicine; general physician; *ology physician; *ology doctor;</p> <p>allergist; allergy physician; anesthesiologist; anesthetist; anaesthesiologist; anaesthetist; andrologist; cardiologist; dermatologist, diabetologist; emergency physician; emergency medicine physician; endocrinologist; epileptologist; gastroenterologist; geriatrician; getriatric physician; gynaecologist; obstetrician; OB/GYN; haematologist; hematologist; hepatologist; immunologist; infectious</p> |

|  |                                                                                                                                                                                                                                                                                                                                                                                                                                                                                                                                                                                                                                                          |
|--|----------------------------------------------------------------------------------------------------------------------------------------------------------------------------------------------------------------------------------------------------------------------------------------------------------------------------------------------------------------------------------------------------------------------------------------------------------------------------------------------------------------------------------------------------------------------------------------------------------------------------------------------------------|
|  | disease physician; infectious disease doctor; internal medicine physician; microbiologist; neonatologist; neurologist; nuclear medicine physician; nephrologist; renal physician; renal doctor; urologist; oncologist; pharmacologist; pulmonologist; psychogeriatrician; ophthalmologist; rheumatologist; radiologist; respiratory physician; respiratory medicine physician; respiratory medicine doctor; palliative care physician; pathologist; sexual health physician; sexual health doctor; psychiatrist; psychiatry doctor; paediatrician; surgeon; surgery doctor; intensive care doctor; intensivist; intensive care physician; cardiothoracic |
|--|----------------------------------------------------------------------------------------------------------------------------------------------------------------------------------------------------------------------------------------------------------------------------------------------------------------------------------------------------------------------------------------------------------------------------------------------------------------------------------------------------------------------------------------------------------------------------------------------------------------------------------------------------------|

|                |  |
|----------------|--|
| CLINICAL FOCUS |  |
|----------------|--|

|                      |                                                                                 |
|----------------------|---------------------------------------------------------------------------------|
| • Allergy/Immunology | Allergist; allergy; immunologist; immunology                                    |
| • Anaesthesiology    | Anesthesiologist; anesthetist; anaesthesiologist; anaesthetist; anaesthesiology |
| • Andrology          | Andrologist                                                                     |
| • Cardiology         | Cardiologist; cardiology                                                        |
| • Dermatology        | Dermatologist; dermatology                                                      |
| • Emergency          | Emergency                                                                       |
| • Endocrinology      | endocrinologist; endocrinology; diabetologist; diabetology; diabetes            |
| • Gastroenterology   | Gastroenterologist; gastroenterology; Hepatologist; hepatology                  |

|                          |                                                                 |
|--------------------------|-----------------------------------------------------------------|
| • Geriatrics             | Geriatrician; geriatric;<br>psychogeriatrician; elderly         |
| • Haematology            | Haematologist; haematology;<br>hematology; hematologist         |
| • Infectious Diseases    | Infectious disease; microbiologist;<br>microbiology             |
| • Internal Medicine      | Internal medicine                                               |
| • Intensive care         | Intensive care; intensivist; critical care                      |
| • Neonatology            | Neonatologist; neonatology; NICU;<br>neonatal                   |
| • Nuclear medicine       | Nuclear medicine                                                |
| • Nephrology             | Nephrologist, nephrology; renal; kidney                         |
| • Neurology              | Neurologist; neurology; epileptologist                          |
| • Obstetrics/Gynaecology | Gynaecologist; gynaecology;<br>obstetrician; OB/GYN; obstetrics |
| • Oncology               | Oncologist; oncology; cancer                                    |
| • Ophthalmology          | Ophthalmologist; ophthalmology                                  |
| • Otolaryngology         | Otolaryngology                                                  |
| • Palliative care        | Palliative care                                                 |
| • Pathology              | Pathologist; pathology                                          |
| • Pharmacology           | Pharmacologist; pharmacology                                    |
| • Paediatrics            | Paediatrician; paediatric*; pediatric*                          |
| • Psychiatry             | Psychiatrist; psychiatry; mental health                         |
| • Radiology              | Radiologist; radiology                                          |
| • Rheumatology           | Rheumatologist; rheumatology                                    |
| • Respiratory medicine   | Lung specialist; respiratory;<br>pulmonologist                  |
| • Sexual health          | Sexual health                                                   |
| • Surgery                | Surgeon; surgery; surgical; operating<br>theatre                |
| • Urology                | Urologist; urology                                              |

\*Note: the clinical focus is a proxy variable based on clinical specialty of attendees

| and/or event description.     |                                                                                                                                            |
|-------------------------------|--------------------------------------------------------------------------------------------------------------------------------------------|
| EVENT TYPE                    |                                                                                                                                            |
| • Meeting (all inclusive/NOS) | Search for generic word “meeting”                                                                                                          |
| • Journal club                | Journal club; journalclub                                                                                                                  |
| • Inservice                   | Inservice                                                                                                                                  |
| • Workshop                    | Workshop                                                                                                                                   |
| • Grand rounds                | Grand round; grandround                                                                                                                    |
| • Scientific meeting          | scientific meeting; congress; conference<br>AND NOT<br>videoconference/teleconference                                                      |
| • Clinical meeting            | internal meeting; departmental meeting;<br>clinical meeting; case review, case<br>conference; case study meeting; case<br>study conference |
| • Multidisciplinary meeting   | Multidisciplinary meeting                                                                                                                  |
